# Supplementary material for: Advanced airborne eDNA sampling allows robust spatiotemporal characterisation of vertebrate communities
Source: Research Square preprint supplement (doi:10.21203/rs.3.rs-5693469/v1), 2025-02-13
Supplement: Supplementary file 1 [file 38c1af543ca9089ac3febd75.xlsx]

## Sheet: Meta Data
Sample	Field_ID	Filter_Type	Filter clasification	Date
F1	S22_D3	M6	ISO ePM10 65%	D3
F10	S27_D3	M6	ISO ePM10 65%	D3
F13	S23_D2	F7_LF	ISO ePM 2.5 70%	D2
F14	S25_D1	F7_LF	ISO ePM 2.5 70%	D1
F15	S11_D1	M6	ISO ePM10 65%	D1
F16	S21_D3	M6	ISO ePM10 65%	D3
F17	S21_D2	F7_LF	ISO ePM 2.5 70%	D2
F18	S18_D3	M6	ISO ePM10 65%	D3
F19	S19_D3	F7_FB	ISO ePM1 65% (Company 2)	D3
F2	S16_D3	M6	ISO ePM10 65%	D3
F20	S16_D1	F7_LF	ISO ePM 2.5 70%	D1
F21	S26_D2	F8	ISO ePM1 65% (Company 1)	D2
F23	S12_D3	F7_LF	ISO ePM 2.5 70%	D3
F24	S15_D1	M6	ISO ePM10 65%	D1
F26	S25_D2	F8	ISO ePM1 65% (Company 1)	D2
F27	S24_D3	F7_FB	ISO ePM1 65% (Company 2)	D3
F28	S7_D2	F8	ISO ePM1 65% (Company 1)	D2
F29	S8_D1	F8	ISO ePM1 65% (Company 1)	D1
F3	S26_D1	F7_FB	ISO ePM1 65% (Company 2)	D1
F30	S14_D1	F7_FB	ISO ePM1 65% (Company 2)	D1
F31	S2_D2	F7_LF	ISO ePM 2.5 70%	D2
F32	S23_D1	F7_FB	ISO ePM1 65% (Company 2)	D1
F33	S9_D1	F8	ISO ePM1 65% (Company 1)	D1
F34	S17_D3	F8	ISO ePM1 65% (Company 1)	D3
F36	S26_D3	F7_FB	ISO ePM1 65% (Company 2)	D3
F37	S12_D1	F8	ISO ePM1 65% (Company 1)	D1
F39	S18_D2	F7_LF	ISO ePM 2.5 70%	D2
F40	S23_D3	F8	ISO ePM1 65% (Company 1)	D3
F41	S13_D3	F7_LF	ISO ePM 2.5 70%	D3
F42	S20_D2	F7_FB	ISO ePM1 65% (Company 2)	D2
F43	S6_D2	F7_FB	ISO ePM1 65% (Company 2)	D2
F44	S25_D3	F7_LF	ISO ePM 2.5 70%	D3
F45	S10_D1	F8	ISO ePM1 65% (Company 1)	D1
F46	S15_D3	F7_LF	ISO ePM 2.5 70%	D3
F47	S24_D2	M6	ISO ePM10 65%	D2
F48	S7_D3	F7_LF	ISO ePM 2.5 70%	D3
F5	S9_D2	M6	ISO ePM10 65%	D2
F50	S12_D2	F7_FB	ISO ePM1 65% (Company 2)	D2
F52	S11_D3	F7_FB	ISO ePM1 65% (Company 2)	D3
F53	S4_D1	F7_LF	ISO ePM 2.5 70%	D1
F54	S15_D2	F8	ISO ePM1 65% (Company 1)	D2
F55	S13_D1	M6	ISO ePM10 65%	D1
F56	S5_D3	F7_FB	ISO ePM1 65% (Company 2)	D3
F57	S27_D1	F7_FB	ISO ePM1 65% (Company 2)	D1
F58	S8_D3	F7_FB	ISO ePM1 65% (Company 2)	D3
F59	S6_D1	F7_LF	ISO ePM 2.5 70%	D1
F60	S9_D3	F7_LF	ISO ePM 2.5 70%	D3
F61	S7_D1	F8	ISO ePM1 65% (Company 1)	D1
F62	S16_D2	M6	ISO ePM10 65%	D2
F63	S3_D3	M6	ISO ePM10 65%	D3
F64	S4_D3	F8	ISO ePM1 65% (Company 1)	D3
F66	S28_D2	F7_FB	ISO ePM1 65% (Company 2)	D2
F68	S21_D1	F7_FB	ISO ePM1 65% (Company 2)	D1
F69	S3_D1	F7_FB	ISO ePM1 65% (Company 2)	D1
F7	S22_D1	F7_LF	ISO ePM 2.5 70%	D1
F70	S10_D3	F8	ISO ePM1 65% (Company 1)	D3
F71	S2_D3	F8	ISO ePM1 65% (Company 1)	D3
F72	S1_D2	F7_FB	ISO ePM1 65% (Company 2)	D2
F73	S20_D1	F7_LF	ISO ePM 2.5 70%	D1
F74	S11_D2	F7_LF	ISO ePM 2.5 70%	D2
F75	S1_D3	F8	ISO ePM1 65% (Company 1)	D3
F76	S13_D2	M6	ISO ePM10 65%	D2
F77	S1_D1	M6	ISO ePM10 65%	D1
F78	S5_D2	F7_FB	ISO ePM1 65% (Company 2)	D2
F79	S28_D1	M6	ISO ePM10 65%	D1
F8	S8_D2	F8	ISO ePM1 65% (Company 1)	D2
F80	S19_D2	M6	ISO ePM10 65%	D2
F81	S24_D1	F8	ISO ePM1 65% (Company 1)	D1
F82	S5_D1	M6	ISO ePM10 65%	D1
F83	S27_D2	F7_LF	ISO ePM 2.5 70%	D2
F84	S4_D2	M6	ISO ePM10 65%	D2
F9	S14_D2	F8	ISO ePM1 65% (Company 1)	D2

## Sheet: BirT Full OTU table (exp1)
OTU	Order	Family	Genus	Species	F5	F47	F43	F72	F24	F84	F76	F50	F42	F18	F16	F78	F15	F31	F62	F79	F77	F26	F82	F36	F74	F28	F7	F80	F44	F69	F9	F39	F10	F66	F55	F2	F83	F8	F32	F1	F21	F34	F56	F46	F68	F63	F37	F54	F33
OTU1	Galliformes	Phasianidae	Gallus	Gallus gallus	113388	96513	96553	82893	88510	81399	75963	68902	69375	64062	63744	59925	60291	59373	57646	58512	56433	55335	51031	51751	50696	44435	45419	48345	43523	42286	40995	40408	40941	39915	37572	37204	37079	36275	33888	34102	31935	31906	32995	30488	30002	29682	29753	34309	28912
OTU2	Anseriformes	Anatidae	Branta	Branta Sp.	26552	17400	13183	30354	16870	11076	20622	15126	34321	5327	4666	6603	24545	2023	6738	16194	7311	9803	11243	8451	8956	5293	16883	18487	0	9650	16002	5691	4579	4748	4716	16477	2605	0	22879	7632	0	0	2699	1797	8907	7103	15335	2581	7658
OTU4	Charadriiformes	Charadriidae	Pluvialis	Pluvialis apricaria	0	0	0	0	8058	0	0	0	0	7927	3180	0	6874	0	0	5343	11548	0	6380	1884	0	0	2354	0	0	8465	0	0	9126	0	0	10559	0	0	3985	4364	0	0	14001	7886	0	6682	0	0	6871
OTU10	Anseriformes	Anatidae	Anas	Anas crecca	7125	1576	12590	7060	4031	2847	5991	6137	7094	3955	3583	2281	10714	2306	5774	3196	3977	4849	2170	0	9520	0	3838	2051	0	582	0	936	889	1210	1034	1726	0	5497	0	1606	0	0	1337	0	1415	0	3360	0	0
OTU7	Galliformes	Phasianidae	Meleagris	Meleagris gallopavo	6002	3609	0	1802	0	2814	2029	0	4626	3768	2509	0	22846	1487	3986	3611	2510	0	2623	0	6459	0	0	6051	0	0	0	977	6721	4061	2012	4389	0	0	0	3392	0	0	3044	0	0	1392	2551	0	0
OTU8	Suliformes	Phalacrocoracidae	Phalacrocorax	Phalacrocorax carbo	3211	1049	0	1263	2394	0	1013	0	0	7492	5503	0	4607	1368	2228	0	2736	0	1734	1439	0	0	0	0	5057	0	0	1165	4598	0	1632	4421	0	0	0	6236	1933	6243	2841	7530	0	5026	0	0	0
OTU5	Galliformes	Phasianidae	Phasianus	Phasianus colchicus	0	0	0	0	1003	651	0	0	0	4267	3418	0	1795	0	957	1024	2483	0	5263	2740	0	0	0	0	2751	0	0	0	5134	0	0	3353	0	0	667	7300	0	21992	5230	983	1330	1670	0	0	0
OTU6	Galliformes	Phasianidae	Phasianus	Phasianus colchicus	0	0	0	0	970	658	0	0	0	4016	3258	0	1716	0	948	1029	2406	0	4879	2550	0	0	0	0	2600	0	0	0	4859	0	0	3183	0	0	674	6779	0	20848	5024	1034	1231	1678	0	0	0
OTU9	Columbiformes	Columbidae	Columba	Columba palumbus	0	0	0	0	2769	1794	0	0	0	5882	4654	0	3551	0	0	3991	1505	0	802	0	0	0	0	0	2615	5704	0	0	6930	0	0	0	0	0	0	7309	0	0	2552	0	0	0	0	0	0
OTU15	Charadriiformes	Laridae	Larus	Larus sp.	3022	1796	0	2236	3340	3221	8602	10108	3990	0	0	0	1988	3748	6719	0	0	6914	2567	0	1820	0	0	2842	0	0	0	4005	1790	3928	2219	4847	3340	0	0	1588	0	0	0	0	2973	0	0	0	0
OTU16	Passeriformes	Turdidae	Turdus	Turdus merula	0	0	0	0	1463	0	6215	0	0	0	0	0	0	3454	0	0	0	0	0	0	0	0	0	0	0	0	0	0	0	0	0	44028	0	0	0	0	0	0	0	0	0	0	0	2755	0
OTU14	Anseriformes	Anatidae	Anas	Anas platyrhynchos	2899	1419	3221	2706	0	925	1897	1292	2293	3684	1360	0	6289	0	1961	973	434	0	989	0	3506	0	0	1894	0	524	0	888	913	557	907	0	0	5309	0	1529	0	0	1277	0	0	0	0	0	0
OTU18	Passeriformes	Paridae	Parus	Parus major	0	3087	0	0	1263	0	0	0	5022	0	0	0	0	0	0	0	0	0	0	0	0	0	0	0	0	0	0	0	0	0	0	0	0	0	0	4519	0	0	0	0	0	0	0	0	0
OTU19	Passeriformes	Passeridae	Passer	Passer sp.	0	0	0	0	0	0	0	0	4986	0	0	0	0	0	0	0	2195	0	0	0	0	3627	0	0	0	0	0	0	0	0	0	0	0	0	0	0	0	0	0	0	0	0	0	0	0
OTU17	Pelecaniformes	Ardeidae	Ardea	Ardea cinerea	0	1873	0	0	0	943	0	2021	0	0	1616	0	0	0	0	0	1048	0	0	0	0	0	0	0	0	0	0	0	0	1799	0	0	0	0	2038	0	0	0	0	0	3063	0	0	0	0
OTU21	Gruiformes	Gruidae	Grus	Grus grus	0	2906	0	0	0	313	1167	0	0	0	0	2086	0	4921	900	0	0	1420	0	0	0	0	0	0	0	0	0	0	0	0	0	0	0	0	0	0	3762	0	0	0	0	0	0	0	0
OTU22	Passeriformes	Fringillidae	Fringilla	Fringilla coelebs	0	0	0	0	0	0	0	0	0	0	0	0	1173	0	0	2228	0	0	6568	0	0	0	0	0	0	0	0	0	4061	0	0	0	0	0	0	0	0	0	0	0	0	0	0	0	0
OTU20	Charadriiformes	Laridae	Chroicocephalus	Chroicocephalus ridibundus	0	0	0	0	454	0	0	0	0	0	0	0	0	0	0	0	0	0	2680	0	0	0	0	0	0	0	0	0	1679	0	0	4792	0	0	0	1591	0	0	0	0	0	0	0	0	0
OTU27	Accipitriformes	Accipitridae	Accipiter	Accipiter nisus	0	0	0	0	0	0	0	0	0	0	0	0	0	0	0	0	0	0	0	0	0	0	0	0	0	0	0	0	0	0	0	0	0	0	0	0	0	0	0	0	0	0	10665	0	0
OTU24	Columbiformes	Columbidae	Columba	Columba livia	1259	0	0	6123	0	577	0	0	0	0	0	0	0	2109	0	0	0	0	0	0	0	0	0	0	0	0	0	0	0	0	0	0	0	0	0	0	0	0	0	0	0	0	0	0	0
OTU26	Passeriformes	Turdidae	Turdus	Turdus philomelos	0	0	0	0	0	0	6267	0	0	0	0	0	0	0	0	0	0	0	0	0	0	0	0	0	0	0	0	0	0	0	0	174	0	0	0	0	0	0	0	0	0	0	0	3084	0
OTU31	Passeriformes	Fringillidae	N/A	N/A	0	0	0	0	6325	0	0	0	0	0	0	0	0	0	0	0	0	0	0	0	0	0	0	0	0	0	0	0	2261	342	0	0	0	0	0	0	0	0	0	0	0	0	0	0	0
OTU28	Columbiformes	Columbidae	Streptopelia	Streptopelia decaocto	0	0	0	0	0	0	0	0	7744	0	0	0	0	0	0	0	0	0	0	0	0	0	0	0	0	0	0	0	0	1111	0	0	0	0	0	0	0	0	0	0	0	0	0	0	0
OTU29	Passeriformes	Panuridae	Panurus	Panurus biarmicus	0	0	0	0	0	0	0	0	0	0	0	0	0	0	0	0	0	0	0	0	0	0	0	0	0	0	0	0	0	0	0	0	0	0	0	0	0	7133	0	0	0	0	0	0	0
OTU30	Charadriiformes	Scolopacidae	Numenius	Numenius sp.	0	0	0	0	0	0	0	0	0	0	0	0	0	0	0	0	0	0	0	0	0	0	0	0	0	0	0	0	0	0	0	0	0	0	0	0	0	0	0	0	0	0	0	0	0
OTU35	Passeriformes	Corvidae	Corvus	Corvus sp.	0	0	0	0	0	0	0	0	977	0	0	0	0	0	0	0	0	0	0	0	0	0	0	0	0	0	0	0	0	0	0	0	0	0	0	0	0	0	0	0	0	0	0	0	0
OTU44	Anseriformes	Anatidae	Aythya	Aythya sp.	0	0	0	0	0	0	2046	0	0	0	0	0	0	0	764	0	0	0	0	0	0	0	0	0	0	0	0	0	0	0	0	0	0	0	0	0	0	0	0	0	0	0	0	1719	0
OTU43	Anseriformes	Anatidae	Melanitta	Melanitta Sp.	0	0	0	0	0	0	0	0	0	0	2094	0	0	0	881	0	0	0	0	0	0	0	0	0	0	0	0	0	0	0	0	0	0	0	0	0	0	0	0	0	0	0	0	0	0
OTU45	Charadriiformes	Scolopacidae	Gallinago	Gallinago gallinago	0	0	0	0	0	0	1221	0	0	0	0	0	0	0	0	0	0	0	1462	0	0	0	0	0	0	0	0	0	0	0	0	0	0	0	0	0	0	0	0	0	0	0	0	0	0
OTU37	Passeriformes	Fringillidae	Chloris	Chloris chloris	0	0	0	0	0	0	0	0	0	0	0	0	0	0	0	0	0	0	0	0	0	0	0	0	0	0	0	0	2283	369	0	0	0	0	0	0	0	0	0	0	0	0	0	0	0
OTU49	Charadriiformes	Charadriidae	Vanellus	Vanellus vanellus	0	0	0	0	0	0	0	0	0	0	0	0	0	0	0	0	0	0	0	0	0	0	0	0	0	0	0	0	0	0	0	0	0	0	0	0	0	0	0	0	0	0	0	0	0
OTU55	Psittaciformes	Psittaculidae	Psittacula	Psittacula sp.	0	0	0	0	0	0	0	0	0	0	0	0	0	0	0	0	0	0	0	0	0	0	0	0	0	0	0	0	0	1704	0	0	0	0	0	0	0	0	0	0	0	0	0	0	0
OTU54	Passeriformes	Paridae	Poecile	Poecile sp.	0	1694	0	0	0	0	0	0	0	0	0	0	0	0	0	0	0	0	0	0	0	0	0	0	0	0	0	0	0	0	0	0	0	0	0	0	0	0	0	0	0	0	0	0	0
OTU57	Galliformes	Phasianidae	Pavo	Pavo cristatus	0	0	0	0	0	0	0	0	0	0	0	0	0	0	0	0	0	0	0	0	0	0	0	0	0	0	0	0	0	0	0	0	0	0	0	0	0	0	0	0	0	0	0	0	0
OTU59	Anseriformes	Anatidae	Cairina	Cairina moschata	0	0	0	0	0	0	0	0	0	0	0	0	1184	0	0	0	0	0	0	0	0	0	0	0	0	0	0	0	0	0	0	0	0	0	0	0	0	0	0	0	0	0	0	0	0
OTU62	Passeriformes	Sittidae	Sitta	Sitta europaea	0	0	0	0	0	0	1070	0	0	0	0	0	0	0	0	0	0	0	0	0	0	0	0	0	0	0	0	0	0	0	0	0	0	0	0	0	0	0	0	0	0	0	0	0	0
OTU58	Accipitriformes	Accipitridae	Buteo	Buteo buteo	0	0	0	0	0	0	0	0	0	0	0	0	0	0	0	727	0	0	275	0	0	0	0	0	0	0	0	0	0	0	0	0	0	0	0	0	0	0	0	0	0	0	0	0	0
OTU51	Passeriformes	Corvidae	Corvus	Corvus sp.	0	0	0	0	0	0	0	0	984	0	0	0	0	0	0	0	0	0	0	0	0	0	0	0	0	0	0	0	0	0	0	0	0	0	0	0	0	0	0	0	0	0	0	0	0
OTU64	Galliformes	Phasianidae	Lophura	Lophura nycthemera	0	639	0	0	0	0	0	0	0	0	0	0	0	0	0	0	0	0	0	0	0	0	0	0	0	0	0	0	0	0	0	0	0	0	0	0	0	0	0	0	0	0	0	0	0
OTU70	Psittaciformes	Psittaculidae	Melopsittacus	Melopsittacus undulatus	0	0	0	0	0	343	0	0	0	0	0	0	0	0	0	0	0	0	0	0	0	0	0	0	0	0	0	0	0	0	0	0	0	0	0	0	0	0	0	0	0	0	0	0	0
[truncated: 28 more columns]

## Sheet: BirT taxa table (exp1)
OTU	Taxa	Order	Family	Genus	Species	Sum	F5	F47	F43	F72	F24	F84	F76	F50	F42	F18	F16	F78	F15	F31	F62	F79	F77	F26	F82	F36	F74	F28	F7	F80	F44	F69	F9	F39	F10	F66	F55	F2	F83	F8	F32	F1	F21	F34	F56	F46	F68	F63	F37
OTU1	Taxa1	Galliformes	Phasianidae	Gallus	Gallus gallus	2790667	113388	96513	96553	82893	88510	81399	75963	68902	69375	64062	63744	59925	60291	59373	57646	58512	56433	55335	51031	51751	50696	44435	45419	48345	43523	42286	40995	40408	40941	39915	37572	37204	37079	36275	33888	34102	31935	31906	32995	30488	30002	29682	29753
OTU2	Taxa2	Anseriformes	Anatidae	Branta	Branta Sp.	620904	26552	17400	13183	30354	16870	11076	20622	15126	34321	5327	4666	6603	24545	2023	6738	16194	7311	9803	11243	8451	8956	5293	16883	18487	0	9650	16002	5691	4579	4748	4716	16477	2605	0	22879	7632	0	0	2699	1797	8907	7103	15335
OTU4	Taxa4	Charadriiformes	Charadriidae	Pluvialis	Pluvialis apricaria	189520	0	0	0	0	8058	0	0	0	0	7927	3180	0	6874	0	0	5343	11548	0	6380	1884	0	0	2354	0	0	8465	0	0	9126	0	0	10559	0	0	3985	4364	0	0	14001	7886	0	6682	0
OTU5_6	Taxa5	Galliformes	Phasianidae	Phasianus	Phasianus colchicus	210779	0	0	0	0	1973	1309	0	0	0	8283	6676	0	3511	0	1905	2053	4889	0	10142	5290	0	0	0	0	5351	0	0	0	9993	0	0	6536	0	0	1341	14079	0	42840	10254	2017	2561	3348	0
OTU10	Taxa6	Anseriformes	Anatidae	Anas	Anas crecca	154994	7125	1576	12590	7060	4031	2847	5991	6137	7094	3955	3583	2281	10714	2306	5774	3196	3977	4849	2170	0	9520	0	3838	2051	0	582	0	936	889	1210	1034	1726	0	5497	0	1606	0	0	1337	0	1415	0	3360
OTU7	Taxa7	Galliformes	Phasianidae	Meleagris	Meleagris gallopavo	134353	6002	3609	0	1802	0	2814	2029	0	4626	3768	2509	0	22846	1487	3986	3611	2510	0	2623	0	6459	0	0	6051	0	0	0	977	6721	4061	2012	4389	0	0	0	3392	0	0	3044	0	0	1392	2551
OTU8	Taxa9	Suliformes	Phalacrocoracidae	Phalacrocorax	Phalacrocorax carbo	113233	3211	1049	0	1263	2394	0	1013	0	0	7492	5503	0	4607	1368	2228	0	2736	0	1734	1439	0	0	0	0	5057	0	0	1165	4598	0	1632	4421	0	0	0	6236	1933	6243	2841	7530	0	5026	0
OTU9	Taxa11	Columbiformes	Columbidae	Columba	Columba palumbus	101713	0	0	0	0	2769	1794	0	0	0	5882	4654	0	3551	0	0	3991	1505	0	802	0	0	0	0	0	2615	5704	0	0	6930	0	0	0	0	0	0	7309	0	0	2552	0	0	0	0
OTU15	Taxa12	Charadriiformes	Laridae	Larus	Larus sp.	88838	3022	1796	0	2236	3340	3221	8602	10108	3990	0	0	0	1988	3748	6719	0	0	6914	2567	0	1820	0	0	2842	0	0	0	4005	1790	3928	2219	4847	3340	0	0	1588	0	0	0	0	2973	0	0
OTU14	Taxa13	Anseriformes	Anatidae	Anas	Anas platyrhynchos	54527	2899	1419	3221	2706	0	925	1897	1292	2293	3684	1360	0	6289	0	1961	973	434	0	989	0	3506	0	0	1894	0	524	0	888	913	557	907	0	0	5309	0	1529	0	0	1277	0	0	0	0
OTU16	Taxa14	Passeriformes	Turdidae	Turdus	Turdus merula	63235	0	0	0	0	1463	0	6215	0	0	0	0	0	0	3454	0	0	0	0	0	0	0	0	0	0	0	0	0	0	0	0	0	44028	0	0	0	0	0	0	0	0	0	0	0
OTU18	Taxa15	Passeriformes	Paridae	Parus	Parus major	31699	0	3087	0	0	1263	0	0	0	5022	0	0	0	0	0	0	0	0	0	0	0	0	0	0	0	0	0	0	0	0	0	0	0	0	0	0	4519	0	0	0	0	0	0	0
OTU17	Taxa16	Pelecaniformes	Ardeidae	Ardea	Ardea cinerea	18690	0	1873	0	0	0	943	0	2021	0	0	1616	0	0	0	0	0	1048	0	0	0	0	0	0	0	0	0	0	0	0	1799	0	0	0	0	2038	0	0	0	0	0	3063	0	0
OTU19	Taxa17	Passeriformes	Passeridae	Passer	Passer sp.	27284	0	0	0	0	0	0	0	0	4986	0	0	0	0	0	0	0	2195	0	0	0	0	3627	0	0	0	0	0	0	0	0	0	0	0	0	0	0	0	0	0	0	0	0	0
OTU21	Taxa19	Gruiformes	Gruidae	Grus	Grus grus	17475	0	2906	0	0	0	313	1167	0	0	0	0	2086	0	4921	900	0	0	1420	0	0	0	0	0	0	0	0	0	0	0	0	0	0	0	0	0	0	3762	0	0	0	0	0	0
OTU22	Taxa20	Passeriformes	Fringillidae	Fringilla	Fringilla coelebs	14030	0	0	0	0	0	0	0	0	0	0	0	0	1173	0	0	2228	0	0	6568	0	0	0	0	0	0	0	0	0	4061	0	0	0	0	0	0	0	0	0	0	0	0	0	0
OTU20	Taxa21	Charadriiformes	Laridae	Chroicocephalus	Chroicocephalus ridibundus	12448	0	0	0	0	454	0	0	0	0	0	0	0	0	0	0	0	0	0	2680	0	0	0	0	0	0	0	0	0	1679	0	0	4792	0	0	0	1591	0	0	0	0	0	0	0
OTU24	Taxa22	Columbiformes	Columbidae	Columba	Columba livia	10068	1259	0	0	6123	0	577	0	0	0	0	0	0	0	2109	0	0	0	0	0	0	0	0	0	0	0	0	0	0	0	0	0	0	0	0	0	0	0	0	0	0	0	0	0
OTU31	Taxa23	Passeriformes	Fringillidae	N/A	N/A	8928	0	0	0	0	6325	0	0	0	0	0	0	0	0	0	0	0	0	0	0	0	0	0	0	0	0	0	0	0	2261	342	0	0	0	0	0	0	0	0	0	0	0	0	0
OTU27	Taxa24	Accipitriformes	Accipitridae	Accipiter	Accipiter nisus	10665	0	0	0	0	0	0	0	0	0	0	0	0	0	0	0	0	0	0	0	0	0	0	0	0	0	0	0	0	0	0	0	0	0	0	0	0	0	0	0	0	0	0	10665
OTU26	Taxa25	Passeriformes	Turdidae	Turdus	Turdus philomelos	9525	0	0	0	0	0	0	6267	0	0	0	0	0	0	0	0	0	0	0	0	0	0	0	0	0	0	0	0	0	0	0	0	174	0	0	0	0	0	0	0	0	0	0	0
OTU28	Taxa26	Columbiformes	Columbidae	Streptopelia	Streptopelia decaocto	8855	0	0	0	0	0	0	0	0	7744	0	0	0	0	0	0	0	0	0	0	0	0	0	0	0	0	0	0	0	0	1111	0	0	0	0	0	0	0	0	0	0	0	0	0
OTU29	Taxa27	Passeriformes	Panuridae	Panurus	Panurus biarmicus	8774	0	0	0	0	0	0	0	0	0	0	0	0	0	0	0	0	0	0	0	0	0	0	0	0	0	0	0	0	0	0	0	0	0	0	0	0	0	7133	0	0	0	0	0
OTU30	Taxa29	Charadriiformes	Scolopacidae	Numenius	Numenius sp.	6886	0	0	0	0	0	0	0	0	0	0	0	0	0	0	0	0	0	0	0	0	0	0	0	0	0	0	0	0	0	0	0	0	0	0	0	0	0	0	0	0	0	0	0
OTU35	Taxa30	Passeriformes	Corvidae	Corvus	Corvus sp.	5868	0	0	0	0	0	0	0	0	977	0	0	0	0	0	0	0	0	0	0	0	0	0	0	0	0	0	0	0	0	0	0	0	0	0	0	0	0	0	0	0	0	0	0
OTU44	Taxa31	Anseriformes	Anatidae	Aythya	Aythya sp.	4529	0	0	0	0	0	0	2046	0	0	0	0	0	0	0	764	0	0	0	0	0	0	0	0	0	0	0	0	0	0	0	0	0	0	0	0	0	0	0	0	0	0	0	0
OTU41	Taxa32	Charadriiformes	Scolopacidae	Calidris	Calidris alpina	0	0	0	0	0	0	0	0	0	0	0	0	0	0	0	0	0	0	0	0	0	0	0	0	0	0	0	0	0	0	0	0	0	0	0	0	0	0	0	0	0	0	0	0
OTU43	Taxa33	Anseriformes	Anatidae	Melanitta	Melanitta Sp.	2975	0	0	0	0	0	0	0	0	0	0	2094	0	0	0	881	0	0	0	0	0	0	0	0	0	0	0	0	0	0	0	0	0	0	0	0	0	0	0	0	0	0	0	0
OTU45	Taxa34	Charadriiformes	Scolopacidae	Gallinago	Gallinago gallinago	2683	0	0	0	0	0	0	1221	0	0	0	0	0	0	0	0	0	0	0	1462	0	0	0	0	0	0	0	0	0	0	0	0	0	0	0	0	0	0	0	0	0	0	0	0
OTU37	Taxa35	Passeriformes	Fringillidae	Chloris	Chloris chloris	2652	0	0	0	0	0	0	0	0	0	0	0	0	0	0	0	0	0	0	0	0	0	0	0	0	0	0	0	0	2283	369	0	0	0	0	0	0	0	0	0	0	0	0	0
OTU49	Taxa36	Charadriiformes	Charadriidae	Vanellus	Vanellus vanellus	2207	0	0	0	0	0	0	0	0	0	0	0	0	0	0	0	0	0	0	0	0	0	0	0	0	0	0	0	0	0	0	0	0	0	0	0	0	0	0	0	0	0	0	0
OTU50	Taxa37	Gruiformes	Rallidae	Fulica	Fulica atra	0	0	0	0	0	0	0	0	0	0	0	0	0	0	0	0	0	0	0	0	0	0	0	0	0	0	0	0	0	0	0	0	0	0	0	0	0	0	0	0	0	0	0	0
OTU55	Taxa38	Psittaciformes	Psittaculidae	Psittacula	Psittacula sp.	1704	0	0	0	0	0	0	0	0	0	0	0	0	0	0	0	0	0	0	0	0	0	0	0	0	0	0	0	0	0	1704	0	0	0	0	0	0	0	0	0	0	0	0	0
OTU54	Taxa39	Passeriformes	Paridae	Poecile	Poecile sp.	1694	0	1694	0	0	0	0	0	0	0	0	0	0	0	0	0	0	0	0	0	0	0	0	0	0	0	0	0	0	0	0	0	0	0	0	0	0	0	0	0	0	0	0	0
OTU57	Taxa40	Galliformes	Phasianidae	Pavo	Pavo cristatus	1639	0	0	0	0	0	0	0	0	0	0	0	0	0	0	0	0	0	0	0	0	0	0	0	0	0	0	0	0	0	0	0	0	0	0	0	0	0	0	0	0	0	0	0
OTU59	Taxa41	Anseriformes	Anatidae	Cairina	Cairina moschata	1184	0	0	0	0	0	0	0	0	0	0	0	0	1184	0	0	0	0	0	0	0	0	0	0	0	0	0	0	0	0	0	0	0	0	0	0	0	0	0	0	0	0	0	0
OTU60	Taxa42	Gruiformes	Rallidae	Gallinula	Gallinula chloropus	0	0	0	0	0	0	0	0	0	0	0	0	0	0	0	0	0	0	0	0	0	0	0	0	0	0	0	0	0	0	0	0	0	0	0	0	0	0	0	0	0	0	0	0
OTU62	Taxa43	Passeriformes	Sittidae	Sitta	Sitta europaea	1070	0	0	0	0	0	0	1070	0	0	0	0	0	0	0	0	0	0	0	0	0	0	0	0	0	0	0	0	0	0	0	0	0	0	0	0	0	0	0	0	0	0	0	0
OTU58	Taxa44	Accipitriformes	Accipitridae	Buteo	Buteo buteo	1002	0	0	0	0	0	0	0	0	0	0	0	0	0	0	0	727	0	0	275	0	0	0	0	0	0	0	0	0	0	0	0	0	0	0	0	0	0	0	0	0	0	0	0
OTU51	Taxa45	Passeriformes	Corvidae	Corvus	Corvus sp.	984	0	0	0	0	0	0	0	0	984	0	0	0	0	0	0	0	0	0	0	0	0	0	0	0	0	0	0	0	0	0	0	0	0	0	0	0	0	0	0	0	0	0	0
OTU64	Taxa46	Galliformes	Phasianidae	Lophura	Lophura nycthemera	639	0	639	0	0	0	0	0	0	0	0	0	0	0	0	0	0	0	0	0	0	0	0	0	0	0	0	0	0	0	0	0	0	0	0	0	0	0	0	0	0	0	0	0
OTU70	Taxa48	Psittaciformes	Psittaculidae	Melopsittacus	Melopsittacus undulatus	343	0	0	0	0	0	343	0	0	0	0	0	0	0	0	0	0	0	0	0	0	0	0	0	0	0	0	0	0	0	0	0	0	0	0	0	0	0	0	0	0	0	0	0
						5646650	163458	133561	125547	134437	137450	107561	134103	103586	141412	110380	99585	70895	147573	80789	89502	96828	94586	78321	100666	68815	80957	53355	68494	79670	56546	67211	56997	54070	96764	59744	50092	135153	43024	47081	64131	87947	37630	88122	71000	49718	48921	53233	61664
[truncated: 29 more columns]

## Sheet: 16Smam Full OTU table (exp1)
OTU	Class	Order	Family	Genus	Species	F24	F10	F56	F16	F19	F1	F3	F60	F63	F77	F15	F27	F59	F18	F52	F32	F82	F2	F75	F30	F58	F68	F23	F79	F69	F48	F20	F44	F34	F57	F9	F41	F64	F36	F73	F8	F76	F46	F53	F7	F31	F71	F17	F70
OTU1	Mammalia	Artiodactyla	Suidae	Sus	Sus scrofa	339095	280464	269741	258673	252119	219733	218699	209634	194268	191214	196908	197811	189425	197594	190399	187385	178704	167122	152570	154098	150612	134070	134575	132137	131450	126014	124022	113889	108032	97694	95654	88336	85459	86971	105324	76114	79938	79329	77594	67462	67991	65408	63459	56430
OTU5	Mammalia	Carnivora	Canidae	Canis	Canis lupus	8483	4651	15904	8742	53489	0	7387	9915	14661	10485	0	18752	8038	14139	18347	5718	43590	8087	13329	0	11151	19595	3858	0	0	16461	9126	13850	0	0	0	9174	5788	0	17025	0	17966	14433	60131	6032	116049	16434	19447	0
OTU7	Mammalia	Artiodactyla	Bovidae	Bos	Bos taurus	76841	17179	0	4983	4178	4188	0	0	3117	5113	8680	0	7039	7205	0	17569	8054	0	3531	54291	22166	4574	0	12391	5056	0	4381	4928	6819	55617	0	0	0	15739	2280	0	6090	3368	7985	2277	8460	3448	6976	0
OTU9	Mammalia	Primates	Hominidae	Homo	Homo sapiens	10694	1811	853	1847	0	691	528	903	1141	1635	751	2081	5408	1321	320	408	2731	513	0	615	0	3591	1346	1332	968	669	2609	0	0	3479	2612	0	5214	0	0	1642	605	0	7708	10958	2729	2868	6439	24153
OTU10	Mammalia	Primates	Hominidae	Homo	Homo sapiens	9722	1660	741	1644	0	524	447	832	973	1528	591	1763	5411	1198	302	354	2537	472	0	538	0	3287	1220	1243	823	599	2372	0	0	3194	2639	0	4828	0	0	1343	516	0	7524	10032	2587	3051	5922	21633
OTU13	Mammalia	Rodentia	Cricetidae	Microtus	Microtus agrestis	0	0	0	24573	0	0	0	0	21201	0	0	0	0	0	0	0	2953	0	4736	0	0	0	0	0	0	0	0	4333	0	0	0	0	0	0	0	0	0	0	0	0	0	13456	0	0
OTU17	Mammalia	Rodentia	Cricetidae	Microtus	Microtus arvalis	0	0	0	0	0	0	0	0	0	0	24736	0	0	0	0	0	0	0	0	0	0	0	0	4314	0	0	0	0	0	0	0	14659	0	0	0	0	0	0	0	0	12080	0	0	0
OTU14	Mammalia	Rodentia	Sciuridae	Sciurus	Sciurus vulgaris	0	0	0	0	0	0	0	0	0	0	0	0	0	0	0	0	3868	0	0	0	24868	0	0	0	0	0	0	0	0	0	0	0	0	0	0	0	0	0	0	0	0	0	0	0
OTU11	Mammalia	Perissodactyla	Equidae	Equus	Equus caballus	12296	0	6705	0	0	0	0	0	0	961	0	0	0	0	0	0	0	0	0	31682	0	0	0	0	0	0	0	0	0	0	0	0	0	0	0	0	0	0	0	0	0	0	0	0
OTU19	Mammalia	Artiodactyla	Suidae	Sus	Sus scrofa	5061	2200	5308	3572	3282	0	0	0	2687	839	0	3605	2183	2137	0	0	1249	3433	0	5148	0	0	4884	0	0	0	0	0	0	0	0	0	3279	1493	0	0	0	0	0	0	0	0	0	0
OTU21	Mammalia	Carnivora	Canidae	Vulpes	Vulpes vulpes	0	0	0	0	0	0	0	0	0	0	0	0	0	0	0	0	0	0	0	0	0	0	0	0	0	0	0	0	0	0	0	0	0	0	0	0	0	0	0	0	0	0	0	0
OTU24	Mammalia	Carnivora	Felidae	Felis	Felis spp.	0	0	0	0	0	0	0	0	0	0	0	0	0	0	0	0	0	0	0	0	0	0	0	0	0	0	0	0	0	0	0	0	0	0	0	0	0	0	0	0	0	0	0	0
OTU26	Mammalia	Primates	Hominidae	Homo	Homo sapiens	0	0	0	0	0	0	0	2761	0	0	0	0	3533	0	0	0	0	0	0	0	0	0	0	0	0	0	0	0	0	0	0	0	0	0	0	0	0	0	0	0	0	0	0	21736
OTU28	Mammalia	Rodentia	Muridae	Apodemus	Apodemus sylvaticus	0	8219	0	4624	0	0	0	0	0	0	0	0	0	0	0	0	0	0	0	0	13639	0	0	0	0	0	0	0	0	0	0	0	0	0	0	0	0	0	0	0	0	0	0	0
OTU31	Mammalia	Rodentia	Cricetidae	Myodes	Myodes glareolus	0	0	0	0	0	0	0	6867	0	0	0	0	0	0	0	0	0	0	0	0	0	0	5234	0	0	0	0	0	0	0	0	0	0	0	0	0	0	0	0	0	0	0	0	0
OTU35	Mammalia	Rodentia	Muridae	Micromys	Micromys minutus	0	0	0	0	0	0	0	0	0	16672	0	0	0	0	0	0	0	0	0	0	0	0	0	0	0	0	0	0	0	0	0	0	0	0	0	0	0	0	0	0	0	0	0	0
OTU33	Mammalia	Primates	Hominidae	Homo	Homo sapiens	0	0	0	0	0	0	0	0	0	0	0	0	0	0	0	0	0	0	0	0	0	0	0	0	0	0	0	0	0	0	0	0	0	0	0	0	0	0	0	1518	0	0	0	11995
OTU22	Aves	Galliformes	Phasianidae	Gallus	Gallus gallus	389	0	0	0	0	0	3160	0	0	0	0	0	0	95	0	163	0	0	0	0	0	0	0	0	0	0	0	0	0	0	0	0	0	0	0	0	132	0	0	0	789	0	0	0
OTU40	Mammalia	Proboscidea	Elephantidae	Loxodonta	Loxodonta africana	0	0	0	0	0	8303	0	0	0	0	0	0	0	0	0	0	0	0	0	0	0	0	0	0	0	0	0	0	0	0	0	0	0	0	0	0	0	0	0	0	0	0	0	0
OTU25	Aves	Galliformes	Phasianidae	Gallus	Gallus gallus	355	0	0	0	0	0	2971	0	0	0	0	0	0	89	0	132	0	0	0	0	0	0	0	0	0	0	0	0	0	0	0	0	0	0	0	0	141	0	0	0	666	0	0	0
OTU45	Mammalia	Artiodactyla	Cervidae	Capreolus	Capreolus capreolus	0	0	0	0	0	0	0	0	0	0	0	0	0	0	0	0	0	0	0	0	0	0	0	0	0	0	0	0	0	0	0	0	0	0	0	0	0	0	0	0	0	0	0	0
OTU39	Mammalia	Primates	Hominidae	Homo	Homo sapiens	0	0	0	0	0	0	0	0	0	0	0	0	0	0	0	0	0	0	0	0	0	0	0	0	0	0	0	0	0	0	0	0	0	0	0	0	0	0	0	0	0	0	0	2591
OTU53	Mammalia	Rodentia	Muridae	Apodemus	Apodemus flavicollis	0	0	0	5218	0	0	0	0	0	0	0	0	0	0	0	0	0	0	0	0	0	0	0	0	0	0	0	0	0	0	0	0	0	0	0	0	0	0	0	0	0	0	0	0
OTU38	Mammalia	Lagomorpha	Leporidae	Lepus	Lepus europaeus	0	0	0	0	0	0	0	0	0	0	0	0	0	0	0	0	0	1758	0	0	0	0	0	0	0	0	0	0	3144	0	0	0	0	0	0	0	0	0	0	0	0	0	0	0
OTU37	Mammalia	Artiodactyla	Suidae	Sus	Sus scrofa	0	0	318	196	0	321	1400	0	0	0	0	0	0	0	0	546	0	369	0	103	0	0	595	96	0	0	105	169	0	0	0	0	0	0	0	0	0	0	0	0	0	0	0	0
OTU43	Mammalia	Rodentia	Muridae	Rattus	Rattus spp.	1790	0	0	0	0	0	0	0	0	0	2387	0	0	0	0	0	0	0	0	0	0	0	0	0	0	0	0	0	0	0	0	0	0	0	0	0	0	0	0	0	0	0	0	0
OTU44	Mammalia	Rodentia	Muridae	Rattus	Rattus spp.	1850	0	0	0	0	0	0	0	0	0	2254	0	0	0	0	0	0	0	0	0	0	0	0	0	0	0	0	0	0	0	0	0	0	0	0	0	0	0	0	0	0	0	0	0
OTU41	Mammalia	Artiodactyla	Suidae	Sus	Sus scrofa	0	151	286	151	0	258	1308	0	0	0	0	0	0	0	0	485	0	339	0	112	0	0	0	106	0	0	116	134	0	0	0	0	0	0	0	0	0	0	0	0	0	0	0	0
OTU78	Mammalia	Primates	Hominidae	Homo	Homo sapiens	0	0	0	0	0	0	0	0	0	0	0	0	0	0	0	0	0	0	0	0	0	0	0	0	0	0	0	0	0	0	0	0	0	0	0	0	0	0	0	0	0	0	0	1539
OTU67	Mammalia	Artiodactyla	Cervidae	Cervus	Cervus elaphus	0	0	0	497	0	0	0	0	0	0	0	0	0	0	0	0	0	0	0	0	0	0	0	0	0	0	0	0	0	0	0	0	0	0	0	0	0	0	0	0	0	0	0	0
OTU54	Mammalia	Primates	Hominidae	Homo	Homo sapiens	0	0	0	0	0	0	0	0	0	0	0	0	0	0	0	0	0	0	0	0	0	0	0	0	0	0	0	0	0	0	0	0	0	0	0	0	0	0	0	0	0	0	0	988
OTU55	Mammalia	Primates	Hominidae	Homo	Homo sapiens	0	0	0	0	0	0	0	0	0	0	0	0	586	0	0	0	0	0	0	0	0	0	0	0	0	0	0	0	0	0	0	0	0	0	0	0	0	595	0	0	0	0	0	1015
OTU58	Mammalia	Primates	Hominidae	Homo	Homo sapiens	0	0	0	0	0	0	0	0	0	0	0	0	0	0	0	0	0	0	0	0	0	0	0	0	0	0	0	0	0	0	0	0	0	0	0	0	0	0	0	0	0	0	0	912
OTU80	Mammalia	Lagomorpha	Leporidae	Oryctolagus	Oryctolagus cuniculus	0	0	0	0	0	0	0	0	0	0	0	0	0	0	0	0	0	0	0	0	0	0	0	0	0	0	0	0	0	0	0	0	0	0	0	0	0	0	0	1506	0	0	0	0
OTU64	Mammalia	Primates	Hominidae	Homo	Homo sapiens	0	0	0	0	0	0	0	0	0	0	0	0	509	0	0	0	0	0	0	0	0	0	0	0	0	0	0	0	0	0	0	0	0	0	0	0	0	553	0	0	0	0	0	0
OTU57	Aves	Anseriformes	Anatidae	N/A	N/A	0	0	0	0	0	0	1230	0	0	0	0	0	0	0	0	0	0	0	0	0	0	0	0	0	0	0	0	0	0	0	0	0	0	0	0	0	0	0	0	0	0	0	0	0
OTU90	Mammalia	Primates	Hominidae	Canis	Canis lupus	0	0	0	0	0	0	0	0	0	0	0	0	0	0	0	0	0	0	0	0	0	0	0	0	0	0	0	0	0	0	0	0	0	0	0	0	0	0	0	0	0	0	0	0
OTU91	Mammalia	Primates	Hominidae	Homo	Homo sapiens	0	0	0	0	0	0	0	0	0	0	0	0	0	0	0	0	0	0	0	0	0	0	0	0	0	0	0	0	0	0	0	0	0	0	0	0	0	0	0	0	0	0	0	481
OTU94	Aves	Anseriformes	Anatidae	N/A	N/A	0	0	0	0	0	0	0	0	0	0	0	0	0	0	0	0	0	0	0	0	0	0	0	0	0	0	0	0	0	0	0	0	0	0	0	0	0	0	0	0	0	0	0	0
OTU85	Aves	Passeriformes	Corvidae	Pica	Pica pica	0	212	0	0	0	0	0	0	0	0	0	0	0	0	0	0	0	0	0	0	0	0	0	0	0	0	0	0	0	0	0	0	0	0	0	0	0	0	0	0	0	0	0	0
OTU86	Aves	Passeriformes	Corvidae	Pica	Pica pica	0	212	0	0	0	0	0	0	0	0	0	0	0	0	0	0	0	0	0	0	0	0	0	0	0	0	0	0	0	0	0	0	0	0	0	0	0	0	0	0	0	0	0	0
OTU132	Aves	Anseriformes	Anatidae	Anas	Anas platyrhynchos	0	0	0	0	0	0	0	0	0	0	0	0	0	0	0	0	0	0	0	0	0	0	0	0	0	0	0	0	0	0	0	0	0	0	0	0	0	0	0	0	0	0	0	0
OTU135	Aves	Galliformes	Phasianidae	Phasianus	Phasianus colchicus	0	0	0	0	0	0	0	0	0	0	0	0	0	0	0	0	0	0	0	0	0	0	0	0	0	0	0	0	0	0	0	0	0	0	0	0	0	0	0	0	0	0	0	0
[truncated: 46 more columns]

## Sheet: 16Smam taxa table (exp1)
OTU	Taxa	Class	Order	Family	Genus	Species	Sum	F24	F10	F56	F16	F19	F1	F3	F60	F63	F77	F15	F27	F59	F18	F52	F32	F82	F2	F75	F30	F58	F68	F23	F79	F69	F48	F20	F44	F34	F57	F9	F41	F64	F36	F73	F8	F76	F46	F53	F7	F31	F71
OTU1_19_37_41	Taxa1	Mammalia	Artiodactyla	Suidae	Sus	Sus scrofa	7604737	344156	282815	275653	262592	255401	220312	221407	209634	196955	192053	196908	201416	191608	199731	190399	188416	179953	171263	152570	159461	150612	134070	140054	132339	131450	126014	124243	114192	108032	97694	95654	88336	88738	88464	105324	76114	79938	79329	77594	67462	67991	65408
OTU5_50_90	Taxa3	Mammalia	Carnivora	Canidae	Canis	Canis lupus	1161705	8483	4651	15904	8742	53489	0	7387	9915	14661	10485	0	18752	8038	14139	18347	5718	43590	8087	13329	0	11151	19595	3858	0	0	16461	9126	13850	0	0	0	9174	5788	0	17025	0	17966	14433	60131	6032	116049	16434
OTU7	Taxa4	Mammalia	Artiodactyla	Bovidae	Bos	Bos taurus	667609	76841	17179	0	4983	4178	4188	0	0	3117	5113	8680	0	7039	7205	0	17569	8054	0	3531	54291	22166	4574	0	12391	5056	0	4381	4928	6819	55617	0	0	0	15739	2280	0	6090	3368	7985	2277	8460	3448
OTU10_26_33_39_54_55_58_64_78_9_91	Taxa5	Mammalia	Primates	Hominidae	Homo	Homo sapiens	407886	20416	3471	1594	3491	0	1215	975	4496	2114	3163	1342	3844	15447	2519	622	762	5268	985	0	1153	0	6878	2566	2575	1791	1268	4981	0	0	6673	5251	0	10042	0	0	2985	1121	1148	15232	22508	5316	5919
OTU13	Taxa6	Mammalia	Rodentia	Cricetidae	Microtus	Microtus agrestis	130533	0	0	0	24573	0	0	0	0	21201	0	0	0	0	0	0	0	2953	0	4736	0	0	0	0	0	0	0	0	4333	0	0	0	0	0	0	0	0	0	0	0	0	0	13456
OTU11	Taxa7	Mammalia	Perissodactyla	Equidae	Equus	Equus caballus	54864	12296	0	6705	0	0	0	0	0	0	961	0	0	0	0	0	0	0	0	0	31682	0	0	0	0	0	0	0	0	0	0	0	0	0	0	0	0	0	0	0	0	0	0
OTU17	Taxa8	Mammalia	Rodentia	Cricetidae	Microtus	Microtus arvalis	87089	0	0	0	0	0	0	0	0	0	0	24736	0	0	0	0	0	0	0	0	0	0	0	0	4314	0	0	0	0	0	0	0	14659	0	0	0	0	0	0	0	0	12080	0
OTU14	Taxa9	Mammalia	Rodentia	Sciuridae	Sciurus	Sciurus vulgaris	66846	0	0	0	0	0	0	0	0	0	0	0	0	0	0	0	0	3868	0	0	0	24868	0	0	0	0	0	0	0	0	0	0	0	0	0	0	0	0	0	0	0	0	0
OTU21	Taxa10	Mammalia	Carnivora	Canidae	Vulpes	Vulpes vulpes	48696	0	0	0	0	0	0	0	0	0	0	0	0	0	0	0	0	0	0	0	0	0	0	0	0	0	0	0	0	0	0	0	0	0	0	0	0	0	0	0	0	0	0
OTU22_25	Taxa11	Aves	Galliformes	Phasianidae	Gallus	Gallus gallus	17432	744	0	0	0	0	0	6131	0	0	0	0	0	0	184	0	295	0	0	0	0	0	0	0	0	0	0	0	0	0	0	0	0	0	0	0	0	273	0	0	0	1455	0
OTU31	Taxa12	Mammalia	Rodentia	Cricetidae	Myodes	Myodes glareolus	21279	0	0	0	0	0	0	0	6867	0	0	0	0	0	0	0	0	0	0	0	0	0	0	5234	0	0	0	0	0	0	0	0	0	0	0	0	0	0	0	0	0	0	0
OTU24	Taxa13	Mammalia	Carnivora	Felidae	Felis	Felis spp.	35350	0	0	0	0	0	0	0	0	0	0	0	0	0	0	0	0	0	0	0	0	0	0	0	0	0	0	0	0	0	0	0	0	0	0	0	0	0	0	0	0	0	0
OTU28	Taxa14	Mammalia	Rodentia	Muridae	Apodemus	Apodemus sylvaticus	29051	0	8219	0	4624	0	0	0	0	0	0	0	0	0	0	0	0	0	0	0	0	13639	0	0	0	0	0	0	0	0	0	0	0	0	0	0	0	0	0	0	0	0	0
OTU35	Taxa15	Mammalia	Rodentia	Muridae	Micromys	Micromys minutus	16672	0	0	0	0	0	0	0	0	0	16672	0	0	0	0	0	0	0	0	0	0	0	0	0	0	0	0	0	0	0	0	0	0	0	0	0	0	0	0	0	0	0	0
OTU38	Taxa16	Mammalia	Lagomorpha	Leporidae	Lepus	Lepus europaeus	4902	0	0	0	0	0	0	0	0	0	0	0	0	0	0	0	0	0	1758	0	0	0	0	0	0	0	0	0	0	3144	0	0	0	0	0	0	0	0	0	0	0	0	0
OTU40	Taxa17	Mammalia	Proboscidea	Elephantidae	Loxodonta	Loxodonta africana	8303	0	0	0	0	0	8303	0	0	0	0	0	0	0	0	0	0	0	0	0	0	0	0	0	0	0	0	0	0	0	0	0	0	0	0	0	0	0	0	0	0	0	0
OTU45	Taxa18	Mammalia	Artiodactyla	Cervidae	Capreolus	Capreolus capreolus	7739	0	0	0	0	0	0	0	0	0	0	0	0	0	0	0	0	0	0	0	0	0	0	0	0	0	0	0	0	0	0	0	0	0	0	0	0	0	0	0	0	0	0
OTU53	Taxa20	Mammalia	Rodentia	Muridae	Apodemus	Apodemus flavicollis	5218	0	0	0	5218	0	0	0	0	0	0	0	0	0	0	0	0	0	0	0	0	0	0	0	0	0	0	0	0	0	0	0	0	0	0	0	0	0	0	0	0	0	0
OTU57	Taxa21	Aves	Anseriformes	Anatidae	N/A	N/A	1230	0	0	0	0	0	0	1230	0	0	0	0	0	0	0	0	0	0	0	0	0	0	0	0	0	0	0	0	0	0	0	0	0	0	0	0	0	0	0	0	0	0	0
OTU43	Taxa23	Mammalia	Rodentia	Muridae	Rattus	Rattus spp.	4177	1790	0	0	0	0	0	0	0	0	0	2387	0	0	0	0	0	0	0	0	0	0	0	0	0	0	0	0	0	0	0	0	0	0	0	0	0	0	0	0	0	0	0
OTU44	Taxa24	Mammalia	Rodentia	Muridae	Rattus	Rattus spp.	4104	1850	0	0	0	0	0	0	0	0	0	2254	0	0	0	0	0	0	0	0	0	0	0	0	0	0	0	0	0	0	0	0	0	0	0	0	0	0	0	0	0	0	0
OTU67	Taxa26	Mammalia	Artiodactyla	Cervidae	Cervus	Cervus elaphus	2823	0	0	0	497	0	0	0	0	0	0	0	0	0	0	0	0	0	0	0	0	0	0	0	0	0	0	0	0	0	0	0	0	0	0	0	0	0	0	0	0	0	0
OTU80	Taxa35	Mammalia	Lagomorpha	Leporidae	Oryctolagus	Oryctolagus cuniculus	1506	0	0	0	0	0	0	0	0	0	0	0	0	0	0	0	0	0	0	0	0	0	0	0	0	0	0	0	0	0	0	0	0	0	0	0	0	0	0	0	1506	0	0
OTU85_86	Taxa36	Aves	Passeriformes	Corvidae	Pica	Pica pica	424	0	424	0	0	0	0	0	0	0	0	0	0	0	0	0	0	0	0	0	0	0	0	0	0	0	0	0	0	0	0	0	0	0	0	0	0	0	0	0	0	0	0
OTU94	Taxa43	Aves	Anseriformes	Anatidae	N/A	N/A	439	0	0	0	0	0	0	0	0	0	0	0	0	0	0	0	0	0	0	0	0	0	0	0	0	0	0	0	0	0	0	0	0	0	0	0	0	0	0	0	0	0	0
OTU132	Taxa53	Aves	Anseriformes	Anatidae	Anas	Anas platyrhynchos	117	0	0	0	0	0	0	0	0	0	0	0	0	0	0	0	0	0	0	0	0	0	0	0	0	0	0	0	0	0	0	0	0	0	0	0	0	0	0	0	0	0	0
OTU135	Taxa57	Aves	Galliformes	Phasianidae	Phasianus	Phasianus colchicus	27	0	0	0	0	0	0	0	0	0	0	0	0	0	0	0	0	0	0	0	0	0	0	0	0	0	0	0	0	0	0	0	0	0	0	0	0	0	0	0	0	0	0
[truncated: 46 more columns]
