# Supplementary material for: Advanced airborne eDNA sampling allows robust spatiotemporal characterisation of vertebrate communities
Source: Research Square preprint supplement (doi:10.21203/rs.3.rs-5693469/v1), 2025-02-13
Supplement: Supplementary file 2 [file 5e5f7cc19683500085f40993.xlsx]

## Sheet: Metadata
OTU	SampleID	SampleSite	SampleType	Fan Voltage	Filter size	Filtration type	Date
AF1	I1_12VX5	I	12v_5	12V	Small	Active	Day1
AF10	J2_12VP	J	12vp	N/A	Large	Passive	Day2
AF100	H3_5VP	H	5vp	N/A	Small	Passive	Day3
AF101	B1_5VP	B	5vp	N/A	Small	Passive	Day1
AF102	A3_5VP	A	5vp	N/A	Small	Passive	Day3
AF103	G1_12VX5	G	12v_5	12V	Small	Active	Day1
AF104	C3_12VX5	C	12v_5	12V	Small	Active	Day3
AF105	J2_5VP	J	5vp	N/A	Small	Passive	Day2
AF106	H3_5V	H	5v	5V	Small	Active	Day3
AF107	G1_5VP	G	5vp	N/A	Small	Passive	Day1
AF108	E1_12VP	E	12vp	N/A	Large	Passive	Day1
AF109	H2_5VP	H	5vp	N/A	Small	Passive	Day2
AF11	F1_5VX12	F	5v_12	5V	Large	Active	Day1
AF110	I2_5V	I	5v	5V	Small	Active	Day2
AF111	A2_5V	A	5v	5V	Small	Active	Day2
AF112	B2_12VP	B	12vp	N/A	Large	Passive	Day2
AF113	H2_5VX12	H	5v_12	5V	Large	Active	Day2
AF114	E2_12V	E	12v	12V	Large	Active	Day2
AF115	G3_12V	G	12v	12V	Large	Active	Day3
AF116	A3_5VX12	A	5v_12	5V	Large	Active	Day3
AF117	D2_5VX12	D	5v_12	5V	Large	Active	Day2
AF118	C1_12VP	C	12vp	N/A	Large	Passive	Day1
AF119	F2_12VX5	F	12v_5	12V	Small	Active	Day2
AF12	I3_12V	I	12v	12V	Large	Active	Day1
AF120	A1_5V	A	5v	5V	Small	Active	Day1
AF121	C1_5VP	C	5vp	N/A	Small	Passive	Day1
AF122	A2_5VP	A	5vp	N/A	Small	Passive	Day2
AF123	J3_5VX12	J	5v_12	5V	Large	Active	Day3
AF124	C2_12VX5	C	12v_5	12V	Small	Active	Day2
AF125	F3_5VP	F	5vp	N/A	Small	Passive	Day3
AF127	E3_5V	E	5v	5V	Small	Active	Day3
AF128	H3_5VX12	H	5v_12	5V	Large	Active	Day3
AF129	G2_12VP		12vp	N/A	Large	Passive	Day2
AF13	J3_12V	J	12v	12V	Large	Active	Day3
AF130	B2_12V	B	12v	12V	Large	Active	Day2
AF131	H1_12V	H	12v	12V	Large	Active	Day1
AF132	I1_12VP	I	12vp	N/A	Large	Passive	Day1
AF133	I3_5V	I	5v	5V	Small	Active	Day3
AF134	D1_5V	D	5v	5V	Small	Active	Day1
AF135	B1_5V	B	5v	5V	Small	Active	Day1
AF136	E3_5VP	E	5vp	N/A	Small	Passive	Day3
AF137	A2_12V	A	12v	12V	Large	Active	Day2
AF138	E2_5VX12	E	5v_12	5V	Large	Active	Day2
AF139	D2_12VP	D	12vp	N/A	Large	Passive	Day2
AF14	D2_12VX5	D	12v_5	12V	Small	Active	Day2
AF140	F2_5VX12	F	5v_12	5V	Large	Active	Day2
AF141	F1_5VP	F	5vp	N/A	Small	Passive	Day1
AF142	D3_12VP	D	12vp	N/A	Large	Passive	Day3
AF143	D2_12V	D	12v	12V	Large	Active	Day2
AF144	A1_5VX12	A	5v_12	5V	Large	Active	Day1
AF145	G1_12VP	G	12vp	N/A	Large	Passive	Day1
AF146	H2_5V	H	5v	5V	Small	Active	Day2
AF147	E2_12VX5	E	12v_5	12V	Small	Active	Day2
AF148	I3_12VP	I	12vp	N/A	Large	Passive	Day3
AF149	A1_12VP	A	12vp	N/A	Large	Passive	Day1
AF15	B1_5VX12	B	5v_12	5V	Large	Active	Day1
AF150	F3_12VP	F	12vp	N/A	Large	Passive	Day3
AF151	B1_12V	B	12v	12V	Large	Active	Day1
AF152	I2_12V	I	12v	12V	Large	Active	Day2
AF153	C2_5V	C	5v	5V	Small	Active	Day2
AF154	I1_5VX12	I	5v_12	5V	Large	Active	Day1
AF155	E3_12V	E	12v	12V	Large	Active	Day3
AF156	C1_5VX12	C	5v_12	5V	Large	Active	Day1
AF157	C3_12VP	C	12vp	N/A	Large	Passive	Day3
AF158	I3_5VP	I	5vp	N/A	Small	Passive	Day3
AF159	G3_5VP	G	5vp	N/A	Small	Passive	Day3
AF16	I3_12VX5	I	12v_5	12V	Small	Active	Day3
AF160	F2_12V	F	12v	12V	Large	Active	Day2
AF161	E3_5VX12	E	5v_12	5V	Large	Active	Day3
AF162	J1_12V	J	12v	12V	Large	Active	Day1
AF163	D3_5VX12	D	5v_12	5V	Large	Active	Day3
AF164	G1_12V	G	12v	12V	Large	Active	Day1
AF165	D1_5VX12	D	5v_12	5V	Large	Active	Day1
AF166	C3_12V	C	12v	12V	Large	Active	Day3
AF167	F2_12VP	F	12vp	N/A	Large	Passive	Day2
AF168	H1_12VX5	H	12v_5	12V	Small	Active	Day1
AF169	F1_12VX5	F	12v_5	12V	Small	Active	Day1
AF17	B2_5VP	B	5vp	N/A	Small	Passive	Day2
AF170	D1_5VP	D	5vp	N/A	Small	Passive	Day1
AF171	I2_5VP	I	5vp	N/A	Small	Passive	Day2
AF172	F3_5V	F	5v	5V	Small	Active	Day3
AF173	H3_12V	H	12v	12V	Large	Active	Day3
AF174	C1_5V	C	5v	5V	Small	Active	Day1
AF175	J1_5VX12	J	5v_12	5V	Large	Active	Day1
AF176	H1_12VP	H	12vp	N/A	Large	Passive	Day1
AF177	D1_12VX5	D	12v_5	12V	Small	Active	Day1
AF178	D1_12VP	D	12vp	N/A	Large	Passive	Day1
AF179	D2_5V	D	5v	5V	Small	Active	Day2
AF18	C2_12VP	C	12vp	N/A	Large	Passive	Day2
AF180	E2_12VP	E	12vp	N/A	Large	Passive	Day2
AF181	C2_12V	C	12v	12V	Large	Active	Day2
AF182	H1_5VP	H	5vp	N/A	Small	Passive	Day1
AF19	B1_12VP	B	12vp	N/A	Large	Passive	Day1
AF2	B3_12V	B	12v	12V	Large	Active	Day3
AF20	D1_12V	D	12v	12V	Large	Active	Day1
AF21	B2_5V	B	5v	5V	Small	Active	Day2
AF22	G3_12VX5	G	12v_5	12V	Small	Active	Day3
AF23	H3_12VP	H	12vp	N/A	Large	Passive	Day3
AF24	I1_5VP	I	5vp	N/A	Small	Passive	Day1
AF25	J3_12VP	J	12vp	N/A	Large	Passive	Day3
AF26	G3_5V	G	5v	5V	Small	Active	Day3
AF27	C1_12VX5	C	12v_5	12V	Small	Active	Day1
AF28	J1_12VP	J	12vp	N/A	Large	Passive	Day1
AF29	C3_5V	C	5v	5V	Small	Active	Day3
AF3	H2_12VX5	H	12v_5	12V	Small	Active	Day2
AF30	A3_5V	A	5v	5V	Small	Active	Day3
AF31	A1_12V	A	12v	12V	Large	Active	Day1
AF32	E2_5VP	E	5vp	N/A	Small	Passive	Day2
AF33	E1_12VX5	E	12v_5	12V	Small	Active	Day1
AF34	C2_5VX12	C	5v_12	5V	Large	Active	Day2
AF35	G2_5VX12	G	5v_12	5V	Large	Active	Day2
AF36	A2_12VP	A	12vp	N/A	Large	Passive	Day2
AF37	H2_12V	H	12v	12V	Large	Active	Day2
AF38	G1_5V	G	5v	5V	Small	Active	Day1
AF39	G2_5V	G	5v	5V	Small	Active	Day2
AF4	E2_5V	E	5v	5V	Small	Active	Day2
AF40	F3_5VX12	F	5v_12	5V	Large	Active	Day3
AF41	H3_12VX5	H	12v_5	12V	Small	Active	Day3
AF42	C3_5VP	C	5vp	N/A	Small	Passive	Day3
AF43	A2_12VX5	A	12v_5	12V	Small	Active	Day2
AF44	J2_5VX12	J	5v_12	5V	Large	Active	Day2
AF45	C2_5VP	C	5vp	N/A	Small	Passive	Day2
AF46	F3_12VX5	F	12v_5	12V	Small	Active	Day3
AF47	G1_5VX12	G	5v_12	5V	Large	Active	Day1
AF48	A3_12V	A	12v	12V	Large	Active	Day3
AF49	C1_12V	C	12v	12V	Large	Active	Day1
AF5	E1_5V	E	5v	5V	Small	Active	Day1
AF50	I3_5VX12	I	5v_12	5V	Large	Active	Day3
AF51	A1_12VX5	A	12v_5	12V	Small	Active	Day1
AF52	G2_12V	G	12v	12V	Large	Active	Day2
AF53	I2_5VX12	I	5v_12	5V	Large	Active	Day2
AF54	G3_12VP	G	12vp	N/A	Large	Passive	Day3
AF55	J3_5V	J	5v	5V	Small	Active	Day3
AF56	H1_5VX12	H	5v_12	5V	Large	Active	Day1
AF57	J1_5VP	J	5vp	N/A	Small	Passive	Day1
AF58	I1_5V	I	5v	5V	Small	Active	Day1
AF59	B3_5VP	B	5vp	N/A	Small	Passive	Day3
AF6	G2_5VP	G	5vp	N/A	Small	Passive	Day2
AF60	B3_12VP	B	12vp	N/A	Large	Passive	Day3
AF61	J1_5V	J	5v	5V	Small	Active	Day1
AF62	B2_12VX5	B	12v_5	12V	Small	Active	Day2
AF64	J3_5VP	J	5vp	N/A	Small	Passive	Day3
AF65	E1_5VP	E	5vp	N/A	Small	Passive	Day1
AF66	I2_12VX5	I	12v_5	12V	Small	Active	Day2
AF67	F3_12V	F	12v	12V	Large	Active	Day3
AF68	F1_12VP	F	12vp	N/A	Large	Passive	Day1
AF69	E1_5VX12	E	5v_12	5V	Large	Active	Day1
AF7	D3_5V	D	5v	5V	Small	Active	Day3
AF70	J1_12VX5	J	12v_5	12V	Small	Active	Day1
AF71	H2_12VP	H	12vp	N/A	Large	Passive	Day2
AF72	J2_12V	J	12v	12V	Large	Active	Day2
AF73	C3_5VX12	C	5v_12	5V	Large	Active	Day3
AF74	I2_12VP	I	12vp	N/A	Large	Passive	Day2
AF75	H1_5V	H	5v	5V	Small	Active	Day1
AF76	B2_5VX12	B	5v_12	5V	Large	Active	Day2
AF77	J3_12VX5	J	12v_5	12V	Small	Active	Day3
AF78	B1_12VX5	B	12v_5	12V	Small	Active	Day1
AF79	B3_5V	B	5v	5V	Small	Active	Day3
AF8	J2_12VX5	J	12v_5	12V	Small	Active	Day2
AF80	F1_12V	F	12v	12V	Large	Active	Day1
AF81	A3_12VX5	A	12v_5	12V	Small	Active	Day3
AF82	D3_12VX5	D	12v_5	12V	Small	Active	Day3
AF83	E3_12VP	E	12vp	N/A	Large	Passive	Day3
AF84	F2_5VP	F	5vp	N/A	Small	Passive	Day2
AF85	G2_12VX5	G	12v_5	12V	Small	Active	Day2
AF86	I1_12V	I	12v	12V	Large	Active	Day1
AF87	A2_5VX12	A	5v_12	5V	Large	Active	Day2
AF88	A3_12VP	A	12vp	N/A	Large	Passive	Day3
AF89	F2_5V	F	5v	5V	Small	Active	Day2
AF9	D3_5VP	D	5vp	N/A	Small	Passive	Day3
AF90	D3_12V	D	12v	12V	Large	Active	Day3
AF91	E1_12V	E	12v	12V	Large	Active	Day1
AF92	B3_5VX12	B	5v_12	5V	Large	Active	Day3
AF93	F1_5V	F	5v	5V	Small	Active	Day1
AF94	J2_5V	J	5v	5V	Small	Active	Day2
AF95	B3_12VX5	B	12v_5	12V	Small	Active	Day3
AF96	G3_5VX12	G	5v_12	5V	Large	Active	Day3
AF97	E3_12VX5	E	12v_5	12V	Small	Active	Day3
AF98	D2_5VP	D	5vp	N/A	Small	Passive	Day2
AF99	A1_5VP	A	5vp	N/A	Small	Passive	Day1

## Sheet: BirT OTU table (exp3)
OTU	Order	Family	Genus	Species	AF99	AF65	AF142	AF178	AF20	AF61	AF49	AF14	AF80	AF156	AF38	AF31	AF5	AF175	AF177	AF164	AF169	AF131	AF154	AF70	AF103	AF37	AF47	AF11	AF151	AF51	AF78	AF58	AF168	AF89	AF181	AF91	AF15	AF162	AF33	AF52	AF173	AF134	AF27	AF120	AF165	AF56	AF152	AF69	AF87
OTU1	Galliformes	Phasianidae	Gallus	Gallus_gallus	782846	443343	194308	44972	32465	29813	28455	22357	18494	16055	17472	16943	14564	12759	12662	14556	13815	13695	12580	12774	11108	11553	11448	10433	12233	9961	11219	10184	11219	10821	10335	9965	7780	9490	8762	8282	7715	8438	8043	7843	6404	6111	6647	5492	5369
OTU10	Passeriformes	Turdidae	Turdus	Turdus_merula	0	0	0	0	0	0	0	0	0	0	0	0	0	0	0	963	0	0	0	0	2702	0	0	0	0	0	0	0	5709	0	16308	3881	0	0	0	0	3278	0	0	0	0	0	0	0	0
OTU102	Passeriformes	Troglodytidae	Troglodytes	Troglodytes_troglodytes	0	0	0	0	0	0	0	0	0	0	0	0	0	0	0	0	0	0	0	0	0	0	0	0	0	0	0	0	0	0	0	0	0	0	0	0	0	0	0	0	0	0	0	0	0
OTU104	Columbiformes	Columbidae	Columba	Columba_palumbus	0	0	0	0	0	0	0	0	0	0	0	0	0	0	0	0	0	0	0	0	0	0	0	0	83	0	0	0	0	0	0	0	0	0	0	0	0	0	0	0	0	0	0	0	0
OTU106	Passeriformes	Phylloscopidae	Phylloscopus	Phylloscopus_collybita	0	0	0	0	0	0	0	0	0	0	0	0	0	0	0	0	0	0	0	0	0	0	0	0	0	0	0	0	0	0	0	0	0	0	0	0	0	0	0	0	0	0	0	0	0
OTU107	Anseriformes	Anatidae	Melanitta	Melanitta_spp.	0	0	0	0	0	0	0	0	0	0	0	0	0	0	0	0	0	0	0	0	0	0	0	0	0	0	0	0	0	0	0	0	0	0	0	0	0	0	0	0	0	0	0	0	0
OTU11	Passeriformes	Alaudidae	Alauda	Alauda_gulgula	0	0	0	0	0	0	7297	0	5107	0	0	8954	0	0	3059	0	0	3367	0	0	0	0	0	0	0	4798	0	0	0	0	0	2226	0	6509	0	0	0	0	0	3158	0	3903	0	0	0
OTU110	Passeriformes	Alaudidae	Alauda	Alauda_gulgula	0	0	0	0	0	0	0	0	0	0	0	0	0	0	0	0	0	0	0	0	0	0	0	0	0	0	0	0	0	0	0	0	0	0	0	0	0	0	0	0	0	0	0	0	0
OTU115	Passeriformes	Phylloscopidae	Phylloscopus	Phylloscopus_collybita	0	0	0	0	0	0	0	0	0	0	0	0	0	0	0	0	0	0	0	0	0	0	0	0	0	0	0	0	0	0	0	0	0	0	0	0	0	0	0	0	0	0	0	0	0
OTU12	Passeriformes	Fringillidae	Pyrrhula	Pyrrhula_pyrrhula	0	0	0	0	0	0	6308	0	0	0	0	0	0	0	0	0	0	0	0	0	0	0	0	0	1758	0	0	0	0	0	8625	0	0	0	0	0	5028	0	1955	0	0	0	0	0	0
OTU121	Passeriformes	Muscicapidae	Erithacus	Erithacus_rubecula	0	0	0	0	0	0	0	0	0	0	0	0	0	0	0	0	0	0	0	0	0	0	0	0	0	0	0	0	0	0	0	0	0	0	0	0	0	0	0	0	0	0	0	0	0
OTU13	Passeriformes	Rhagologidae	Rhagologus	Rhagologus_leucostigma	0	0	0	0	0	0	0	0	0	0	0	0	0	0	0	0	0	0	0	0	0	0	0	0	0	0	0	0	0	0	0	0	0	0	0	0	0	0	0	0	0	0	0	0	0
OTU14	Suliformes	Sulidae	Phalacrocorax	Phalacrocorax_carbo	0	0	0	0	0	0	4003	0	0	0	0	0	2289	2437	0	0	1139	1146	2213	0	0	0	0	0	2278	0	0	0	0	0	0	1074	0	3040	0	0	2082	0	0	0	0	0	0	0	0
OTU15	Passeriformes	Sittidae	Sitta	Sitta_europaea	0	0	0	0	0	0	0	0	0	0	0	0	0	0	0	2529	0	0	0	0	0	0	0	0	0	0	0	3316	0	0	0	0	0	0	0	0	0	0	0	0	0	0	0	0	0
OTU16	Charadriiformes	Laridae	Larus	Larus_spp.	0	0	0	0	0	0	2953	0	0	0	0	0	0	0	3159	0	0	0	0	0	0	0	0	0	0	0	0	0	0	0	0	0	0	0	0	0	0	0	0	0	0	0	0	0	1816
OTU17	Passeriformes	Paridae	Cyanistes	Cyanistes_spp.	0	0	0	0	0	0	0	0	0	0	0	0	0	0	2395	0	0	3730	1051	8629	0	0	0	0	0	0	0	0	3713	0	0	8934	0	0	0	0	0	0	0	0	0	0	3389	0	0
OTU18	Piciformes	Picidae	Dendrocopos	Dendrocopos_major	0	0	0	0	0	0	0	0	0	0	10117	0	0	0	0	0	0	0	0	0	2514	0	0	0	0	0	0	0	0	0	0	0	1113	0	0	0	4475	0	0	0	0	0	0	0	0
OTU19	Passeriformes	Passeridae	Passer	Passer_montanus	0	0	0	0	0	5924	0	0	7726	0	0	0	0	0	0	0	1715	0	0	0	0	1692	0	0	0	0	0	0	0	0	0	0	0	0	0	0	0	0	0	6100	4147	0	0	0	0
OTU2	Anseriformes	Anatidae	Melanitta	Melanitta_spp.	0	0	0	0	4771	14400	9426	0	9980	5298	14554	26227	2666	6523	3032	8768	9728	8652	0	6521	9343	5917	0	7309	5204	8045	36996	11262	13003	2450	32919	12854	0	10422	4400	15877	6632	0	4471	6710	9272	8058	37972	11489	21242
OTU20	Piciformes	Picidae	Dendrocopos	Dendrocopos_major	0	0	0	0	0	0	0	0	0	0	8833	0	0	0	0	0	0	0	0	0	2445	0	0	0	0	0	0	0	0	0	0	0	1104	0	0	0	3732	0	0	0	0	0	0	0	0
OTU21	Anseriformes	Anatidae	Melanitta	Melanitta_deglandi	0	0	0	0	0	0	1144	0	0	0	0	1165	0	0	0	0	1195	0	0	0	0	0	0	1439	0	0	0	3270	0	0	0	0	0	3820	0	4190	781	0	0	0	0	4017	0	0	0
OTU23	Galliformes	Phasianidae	Phasianus	Phasianus_colchicus	0	0	0	0	0	0	0	0	0	0	0	0	0	0	0	0	0	0	0	0	818	556	1936	0	0	0	0	0	0	0	0	2941	0	2992	0	0	0	0	0	0	0	0	0	0	0
OTU24	Passeriformes	Fringillidae	N/A	N/A	0	0	0	0	0	0	0	0	0	0	0	0	0	0	0	0	0	0	0	0	0	0	0	0	0	0	0	0	0	0	1670	0	0	0	0	0	0	0	2133	0	0	0	0	0	0
OTU25	Galliformes	Phasianidae	Phasianus	Phasianus_colchicus	0	0	0	0	0	0	0	0	0	0	0	0	0	0	0	0	0	0	0	0	0	0	2093	0	0	0	0	0	0	0	0	2950	0	3084	0	0	0	0	0	0	0	0	0	0	0
OTU26	Passeriformes	Certhiidae	Certhia	Certhia_brachydactyla	0	0	0	0	0	0	0	0	0	0	0	0	0	0	0	2204	0	0	0	0	0	0	2642	0	0	0	0	0	0	0	0	0	0	0	0	0	0	0	0	0	0	0	0	0	0
OTU27	Passeriformes	Certhiidae	Certhia	Certhia_brachydactyla	0	0	0	0	0	0	0	0	0	0	0	0	0	0	0	2188	0	0	0	0	0	0	1639	0	0	0	0	0	0	0	0	0	0	0	0	0	0	0	0	0	0	0	0	0	0
OTU28	Passeriformes	Sylviidae	Sylvia	Sylvia_atricapilla	0	0	0	0	0	0	0	0	0	0	0	0	0	0	0	0	0	0	0	0	0	0	0	0	0	0	0	0	0	0	0	0	0	0	0	0	0	0	0	0	0	0	0	0	0
OTU29	Passeriformes	Corvidae	Corvus	Corvus_spp.	0	0	0	0	0	0	0	0	0	0	0	0	0	0	0	0	0	0	0	0	0	4306	0	0	0	0	0	0	3512	0	0	0	0	0	0	0	0	0	0	0	0	0	0	0	2669
OTU3	Passeriformes	Troglodytidae	Troglodytes	Troglodytes_troglodytes	0	0	0	0	0	9926	0	0	0	0	0	0	0	0	0	0	0	11411	0	0	0	36481	0	0	0	0	0	9382	0	0	0	0	0	11603	0	7881	37414	0	0	0	0	0	0	0	0
OTU30	Strigiformes	Strigidae	Strix	Strix_aluco	0	0	0	0	0	0	0	0	0	0	0	0	0	0	0	0	0	0	0	0	0	0	0	0	0	0	0	0	0	0	0	0	0	0	0	0	0	0	0	0	0	0	0	0	0
OTU31	Pelecaniformes	Ardeidae	Ardea	Ardea_cinerea	0	0	0	0	0	0	0	0	7634	0	0	0	0	0	0	0	0	0	0	0	0	0	0	0	1161	0	0	0	0	0	0	0	0	0	0	0	0	0	0	0	0	5777	0	0	0
OTU32	Anseriformes	Anatidae	Anser	Anser_anser	0	0	0	0	0	0	0	0	0	0	0	0	0	0	0	0	0	3545	0	0	3900	0	2545	0	0	0	0	0	0	0	0	0	0	0	0	0	0	0	0	0	0	0	0	0	0
OTU33	Passeriformes	Prunellidae	Prunella	Prunella_modularis	0	0	0	0	0	0	0	0	0	0	0	0	0	0	0	0	0	0	0	0	0	0	0	0	0	0	0	0	0	0	0	0	0	0	0	0	0	0	0	0	0	0	0	0	0
OTU34	Passeriformes	Regulidae	Regulus	Regulus_regulus	0	0	0	0	0	0	0	0	0	0	0	0	0	0	0	0	0	0	0	0	0	1404	0	0	0	0	0	0	0	0	0	0	0	0	0	0	0	0	0	0	0	0	0	0	0
OTU37	Columbiformes	Columbidae	Columba	Columba_livia	0	0	0	0	0	0	0	0	0	0	0	0	0	0	0	0	0	0	0	0	0	0	0	0	0	0	0	0	0	0	0	0	0	0	0	0	0	0	0	0	0	0	0	0	0
OTU38	Anseriformes	Anatidae	Somateria	Somateria_spp.	0	0	0	0	0	0	0	0	0	0	0	0	0	0	0	0	0	0	0	0	0	0	0	0	0	0	0	0	0	0	0	0	0	0	0	0	0	0	4300	0	0	0	0	0	0
OTU39	Anseriformes	Anatidae	Melanitta	Melanitta_spp.	0	0	0	0	0	0	381	0	0	0	0	0	0	0	0	0	0	0	0	0	0	0	0	1738	0	0	0	0	0	0	0	0	0	0	0	0	0	0	0	0	0	0	0	0	0
OTU4	Passeriformes	Oreoicidae	Aleadryas	Aleadryas_rufinucha	0	0	0	0	0	0	0	0	0	0	0	0	0	0	0	0	0	0	0	0	0	0	0	0	0	0	0	0	0	0	0	0	0	0	0	0	0	0	0	0	0	0	0	0	0
OTU40	Passeriformes	Hirundinidae	Delichon	Delichon_urbicum	0	0	0	0	0	0	0	0	0	0	0	0	0	0	0	9094	0	0	0	0	0	0	0	0	0	0	0	0	0	0	0	0	0	0	0	0	0	0	0	0	0	0	0	0	0
OTU41	Anseriformes	Anatidae	Anas	Anas_platyrhynchos	0	0	0	0	0	2063	0	0	0	0	0	0	0	0	0	0	0	2773	0	0	0	0	0	0	0	0	0	0	0	0	0	0	0	0	0	0	0	0	0	0	0	0	0	0	0
OTU43	Accipitriformes	Accipitridae	Buteo	Buteo_buteo	0	0	0	0	0	0	0	0	0	0	0	0	0	0	0	0	0	0	0	0	0	0	0	0	0	0	0	0	0	0	0	0	0	0	0	0	0	0	0	0	0	0	0	0	0
OTU45	Passeriformes	Sturnidae	Sturnus	Sturnus_vulgaris	0	0	0	0	0	0	0	0	0	0	0	1903	0	0	0	0	0	0	0	0	0	0	0	0	0	0	0	0	0	0	0	0	0	0	0	0	0	0	0	0	0	0	0	0	0
OTU46	Passeriformes	Sylviidae	Sylvia	Sylvia_spp.	0	0	0	0	0	0	6066	0	0	0	0	0	0	0	0	0	0	0	0	0	0	0	0	0	0	0	0	0	0	0	0	0	0	0	0	0	0	0	0	0	0	0	0	0	0
OTU47	Accipitriformes	Accipitridae	Accipiter	Accipiter_nisus	0	0	0	0	0	0	0	0	0	0	0	0	0	0	0	0	0	0	0	0	0	0	0	0	0	0	0	0	0	0	0	0	0	0	0	0	0	0	0	0	0	0	0	0	0
OTU5	Passeriformes	Fringillidae	Fringilla	Fringilla_coelebs	0	0	0	0	0	0	0	0	0	0	0	0	0	0	0	0	0	0	0	0	0	0	0	0	0	0	0	0	0	0	0	0	0	4636	0	0	4845	0	0	0	0	0	0	0	0
OTU50	Passeriformes	Paridae	Poecile	Poecile_spp.	0	0	0	0	0	0	0	0	0	0	0	0	0	0	0	0	0	0	0	0	0	0	0	0	0	0	0	0	0	0	0	0	0	0	0	0	0	0	0	0	2771	0	0	0	0
OTU55	Columbiformes	Columbidae	N/A	N/A	0	0	0	0	0	0	0	0	0	0	0	0	0	0	0	0	0	0	0	0	0	0	0	0	0	0	4435	0	0	0	0	0	0	0	0	0	0	0	0	0	0	0	0	0	0
OTU56	Suliformes	Sulidae	Morus	Morus_spp.	0	0	0	0	0	0	0	0	0	0	0	0	0	0	0	0	0	0	0	0	0	0	0	0	0	0	0	0	0	0	0	0	0	0	0	0	0	0	0	0	0	0	0	0	0
OTU57	Piciformes	Picidae	Picus	Picus_viridis	0	0	0	0	0	0	0	0	0	0	0	0	0	0	0	0	0	0	0	0	0	0	0	0	0	0	0	0	0	0	0	0	0	0	0	0	0	0	0	0	0	0	762	0	0
OTU58	Psittaciformes	Psittaculidae	Melopsittacus	Melopsittacus_undulatus	0	0	0	0	0	0	0	0	0	0	0	0	0	0	2330	0	0	0	0	0	0	0	0	0	0	0	0	0	0	0	0	0	0	0	0	0	0	0	0	0	0	0	0	0	0
OTU6	Passeriformes	Muscicapidae	Erithacus	Erithacus_rubecula	0	0	0	0	0	0	0	0	0	0	0	0	0	0	0	0	0	0	0	0	0	0	0	0	0	0	0	0	0	0	0	0	0	7993	0	0	7214	0	0	0	0	0	0	0	0
OTU60	Anseriformes	Anatidae	Melanitta	Melanitta_spp.	0	0	0	0	0	0	0	0	0	0	0	0	0	0	0	0	0	0	0	0	0	0	0	0	61	0	0	0	0	0	0	0	0	0	0	0	0	0	0	0	0	0	0	0	0
OTU7	Columbiformes	Columbidae	Columba	Columba_palumbus	0	0	0	0	2449	0	0	0	0	0	0	0	25053	0	0	0	0	0	0	0	4612	0	0	0	91173	0	0	5779	0	0	0	0	0	0	0	0	0	0	0	0	0	0	3984	0	0
OTU70	Strigiformes	Strigidae	Strix	Strix_aluco	0	0	0	0	0	0	0	0	0	0	0	0	0	0	0	0	0	0	0	0	0	0	0	0	0	0	0	0	0	0	0	0	0	0	0	0	0	0	0	0	0	0	0	0	0
OTU75	Passeriformes	Muscicapidae	Erithacus	Erithacus_rubecula	0	0	0	0	0	0	0	0	0	0	0	0	0	0	0	0	0	0	0	0	0	0	0	0	0	0	0	0	0	0	0	0	0	0	0	0	0	0	0	0	0	0	0	0	0
OTU76	Anseriformes	Anatidae	Melanitta	Melanitta_spp.	0	0	0	0	0	0	0	0	0	0	0	0	0	0	0	0	0	0	0	0	0	0	0	0	0	0	0	0	0	0	0	0	0	0	0	0	0	0	0	0	0	0	0	0	0
OTU77	Columbiformes	Columbidae	Columba	Columba_spp.	0	0	0	0	0	0	0	0	0	0	0	0	0	0	0	0	0	0	0	0	0	0	0	0	0	0	0	0	0	0	0	0	0	0	0	0	0	0	0	0	0	0	0	0	0
OTU8	Passeriformes	Phylloscopidae	Phylloscopus	Phylloscopus_collybita	0	0	0	0	0	0	3420	0	0	0	0	0	0	4397	0	0	0	1821	0	0	0	0	0	0	0	0	2737	0	0	0	0	0	4985	5837	0	0	2964	0	0	0	0	0	0	0	0
OTU82	Passeriformes	Troglodytidae	Troglodytes	Troglodytes_troglodytes	0	0	0	0	0	0	0	0	0	0	0	0	0	0	0	0	0	0	0	0	0	0	0	0	0	0	0	0	0	0	0	0	0	0	0	0	35	0	0	0	0	0	0	0	0
OTU86	Passeriformes	Phylloscopidae	Phylloscopus	Phylloscopus_collybita	0	0	0	0	0	0	0	0	0	0	0	0	0	0	0	0	0	0	0	0	0	0	0	0	0	0	0	0	0	0	0	0	0	0	0	0	0	0	0	0	0	0	0	0	0
OTU87	Passeriformes	Troglodytidae	Troglodytes	Troglodytes_spp.	0	0	0	0	0	0	0	0	0	0	0	0	0	0	0	0	0	0	0	0	0	0	0	0	0	0	0	0	0	0	0	0	0	0	0	0	0	0	0	0	0	0	0	0	0
OTU88	Passeriformes	Phylloscopidae	Phylloscopus	Phylloscopus_collybita	0	0	0	0	0	0	0	0	0	0	0	0	0	0	0	0	0	0	0	0	0	0	0	0	0	0	0	0	0	0	0	0	0	0	0	0	0	0	0	0	0	0	0	0	0
OTU9	Passeriformes	Paridae	Parus	Parus_major	0	0	0	0	0	0	9935	0	0	0	0	0	0	0	3346	0	0	3873	1475	11430	0	0	0	0	0	0	0	0	8563	0	0	9142	0	9286	3267	4025	2750	0	7443	0	0	0	6705	0	0
OTU90	Passeriformes	Muscicapidae	Erithacus	Erithacus_rubecula	0	0	0	0	0	0	0	0	0	0	0	0	0	0	0	0	0	0	0	0	0	0	0	0	0	0	0	0	0	0	0	0	0	0	0	0	20	0	0	0	0	0	0	0	0
OTU99	Galliformes	Phasianidae	Gallus	Gallus_gallus	0	0	0	0	0	0	0	0	0	0	0	0	0	0	0	0	0	0	0	0	0	0	0	0	76	0	0	0	0	0	0	0	0	0	0	0	0	0	0	0	0	0	0	0	0
[truncated: 77 more columns]

## Sheet: BirT Taxa table (exp3)
OTU	Tax	Order	Family	Genus	Species	Sum	AF99	AF65	AF142	AF178	AF20	AF61	AF49	AF14	AF80	AF156	AF38	AF31	AF5	AF175	AF177	AF164	AF169	AF131	AF154	AF70	AF103	AF37	AF47	AF11	AF151	AF51	AF78	AF58	AF168	AF89	AF181	AF91	AF15	AF162	AF33	AF52	AF173	AF134	AF27	AF120	AF165	AF56	AF152
OTU1_99	Taxa1	Galliformes	Phasianidae	Gallus	Gallus_gallus	2080610	782846	443343	194308	44972	32465	29813	28455	22357	18494	16055	17472	16943	14564	12759	12662	14556	13815	13695	12580	12774	11108	11553	11448	10433	12309	9961	11219	10184	11219	10821	10335	9965	7780	9490	8762	8282	7715	8438	8043	7843	6404	6111	6647
OTU2_60_76_39_107	Taxa2	Anseriformes	Anatidae	Melanitta	Melanitta_spp.	1292954	0	0	0	0	4771	14400	9807	0	9980	5298	14554	26227	2666	6523	3032	8768	9728	8652	0	6521	9343	5917	0	9047	5265	8045	36996	11262	13003	2450	32919	12854	0	10422	4400	15877	6632	0	4471	6710	9272	8058	37972
OTU3_82_87_102	Taxa3	Passeriformes	Troglodytidae	Troglodytes	Troglodytes_troglodytes	636292	0	0	0	0	0	9926	0	0	0	0	0	0	0	0	0	0	0	11411	0	0	0	36481	0	0	0	0	0	9382	0	0	0	0	0	11603	0	7881	37449	0	0	0	0	0	0
OTU4	Taxa4	Passeriformes	Oreoicidae	Aleadryas	Aleadryas_rufinucha	577572	0	0	0	0	0	0	0	0	0	0	0	0	0	0	0	0	0	0	0	0	0	0	0	0	0	0	0	0	0	0	0	0	0	0	0	0	0	0	0	0	0	0	0
OTU5	Taxa5	Passeriformes	Fringillidae	Fringilla	Fringilla_coelebs	544608	0	0	0	0	0	0	0	0	0	0	0	0	0	0	0	0	0	0	0	0	0	0	0	0	0	0	0	0	0	0	0	0	0	4636	0	0	4845	0	0	0	0	0	0
OTU6_75_90_121	Taxa6	Passeriformes	Muscicapidae	Erithacus	Erithacus_rubecula	325751	0	0	0	0	0	0	0	0	0	0	0	0	0	0	0	0	0	0	0	0	0	0	0	0	0	0	0	0	0	0	0	0	0	7993	0	0	7234	0	0	0	0	0	0
OTU7_104	Taxa7	Columbiformes	Columbidae	Columba	Columba_palumbus	270724	0	0	0	0	2449	0	0	0	0	0	0	0	25053	0	0	0	0	0	0	0	4612	0	0	0	91256	0	0	5779	0	0	0	0	0	0	0	0	0	0	0	0	0	0	3984
OTU9	Taxa8	Passeriformes	Paridae	Parus	Parus_major	215724	0	0	0	0	0	0	9935	0	0	0	0	0	0	0	3346	0	0	3873	1475	11430	0	0	0	0	0	0	0	0	8563	0	0	9142	0	9286	3267	4025	2750	0	7443	0	0	0	6705
OTU10	Taxa9	Passeriformes	Turdidae	Turdus	Turdus_merula	200498	0	0	0	0	0	0	0	0	0	0	0	0	0	0	0	963	0	0	0	0	2702	0	0	0	0	0	0	0	5709	0	16308	3881	0	0	0	0	3278	0	0	0	0	0	0
OTU8_86_88_106_115	Taxa10	Passeriformes	Phylloscopidae	Phylloscopus	Phylloscopus_collybita	169407	0	0	0	0	0	0	3420	0	0	0	0	0	0	4397	0	0	0	1821	0	0	0	0	0	0	0	0	2737	0	0	0	0	0	4985	5837	0	0	2964	0	0	0	0	0	0
OTU11_110	Taxa11	Passeriformes	Alaudidae	Alauda	Alauda_gulgula	139502	0	0	0	0	0	0	7297	0	5107	0	0	8954	0	0	3059	0	0	3367	0	0	0	0	0	0	0	4798	0	0	0	0	0	2226	0	6509	0	0	0	0	0	3158	0	3903	0
OTU12	Taxa12	Passeriformes	Fringillidae	Pyrrhula	Pyrrhula_pyrrhula	134000	0	0	0	0	0	0	6308	0	0	0	0	0	0	0	0	0	0	0	0	0	0	0	0	0	1758	0	0	0	0	0	8625	0	0	0	0	0	5028	0	1955	0	0	0	0
OTU13	Taxa13	Passeriformes	Rhagologidae	Rhagologus	Rhagologus_leucostigma	103033	0	0	0	0	0	0	0	0	0	0	0	0	0	0	0	0	0	0	0	0	0	0	0	0	0	0	0	0	0	0	0	0	0	0	0	0	0	0	0	0	0	0	0
OTU26_27	Taxa14	Passeriformes	Certhiidae	Certhia	Certhia_brachydactyla	73784	0	0	0	0	0	0	0	0	0	0	0	0	0	0	0	4392	0	0	0	0	0	0	4281	0	0	0	0	0	0	0	0	0	0	0	0	0	0	0	0	0	0	0	0
OTU14	Taxa15	Suliformes	Sulidae	Phalacrocorax	Phalacrocorax_carbo	70991	0	0	0	0	0	0	4003	0	0	0	0	0	2289	2437	0	0	1139	1146	2213	0	0	0	0	0	2278	0	0	0	0	0	0	1074	0	3040	0	0	2082	0	0	0	0	0	0
OTU16	Taxa16	Charadriiformes	Laridae	Larus	Larus_spp.	69962	0	0	0	0	0	0	2953	0	0	0	0	0	0	0	3159	0	0	0	0	0	0	0	0	0	0	0	0	0	0	0	0	0	0	0	0	0	0	0	0	0	0	0	0
OTU15	Taxa17	Passeriformes	Sittidae	Sitta	Sitta_europaea	65510	0	0	0	0	0	0	0	0	0	0	0	0	0	0	0	2529	0	0	0	0	0	0	0	0	0	0	0	3316	0	0	0	0	0	0	0	0	0	0	0	0	0	0	0
OTU19	Taxa18	Passeriformes	Passeridae	Passer	Passer_montanus	65197	0	0	0	0	0	5924	0	0	7726	0	0	0	0	0	0	0	1715	0	0	0	0	1692	0	0	0	0	0	0	0	0	0	0	0	0	0	0	0	0	0	6100	4147	0	0
OTU18_20	Taxa19	Piciformes	Picidae	Dendrocopos	Dendrocopos_major	59666	0	0	0	0	0	0	0	0	0	0	18950	0	0	0	0	0	0	0	0	0	4959	0	0	0	0	0	0	0	0	0	0	0	2217	0	0	0	8207	0	0	0	0	0	0
OTU17	Taxa20	Passeriformes	Paridae	Cyanistes	Cyanistes_spp.	56626	0	0	0	0	0	0	0	0	0	0	0	0	0	0	2395	0	0	3730	1051	8629	0	0	0	0	0	0	0	0	3713	0	0	8934	0	0	0	0	0	0	0	0	0	0	3389
OTU21	Taxa21	Anseriformes	Anatidae	Melanitta	Melanitta_deglandi	55608	0	0	0	0	0	0	1144	0	0	0	0	1165	0	0	0	0	1195	0	0	0	0	0	0	1439	0	0	0	3270	0	0	0	0	0	3820	0	4190	781	0	0	0	0	4017	0
OTU23_25	Taxa22	Galliformes	Phasianidae	Phasianus	Phasianus_colchicus	42658	0	0	0	0	0	0	0	0	0	0	0	0	0	0	0	0	0	0	0	0	818	556	4029	0	0	0	0	0	0	0	0	5891	0	6076	0	0	0	0	0	0	0	0	0
OTU29	Taxa23	Passeriformes	Corvidae	Corvus	Corvus_spp.	38319	0	0	0	0	0	0	0	0	0	0	0	0	0	0	0	0	0	0	0	0	0	4306	0	0	0	0	0	0	3512	0	0	0	0	0	0	0	0	0	0	0	0	0	0
OTU28	Taxa24	Passeriformes	Sylviidae	Sylvia	Sylvia_atricapilla	25637	0	0	0	0	0	0	0	0	0	0	0	0	0	0	0	0	0	0	0	0	0	0	0	0	0	0	0	0	0	0	0	0	0	0	0	0	0	0	0	0	0	0	0
OTU24	Taxa25	Passeriformes	Fringillidae	N/A	N/A	23407	0	0	0	0	0	0	0	0	0	0	0	0	0	0	0	0	0	0	0	0	0	0	0	0	0	0	0	0	0	0	1670	0	0	0	0	0	0	0	2133	0	0	0	0
OTU30_70	Taxa26	Strigiformes	Strigidae	Strix	Strix_aluco	20445	0	0	0	0	0	0	0	0	0	0	0	0	0	0	0	0	0	0	0	0	0	0	0	0	0	0	0	0	0	0	0	0	0	0	0	0	0	0	0	0	0	0	0
OTU32	Taxa27	Anseriformes	Anatidae	Anser	Anser_anser	16671	0	0	0	0	0	0	0	0	0	0	0	0	0	0	0	0	0	3545	0	0	3900	0	2545	0	0	0	0	0	0	0	0	0	0	0	0	0	0	0	0	0	0	0	0
OTU31	Taxa28	Pelecaniformes	Ardeidae	Ardea	Ardea_cinerea	14572	0	0	0	0	0	0	0	0	7634	0	0	0	0	0	0	0	0	0	0	0	0	0	0	0	1161	0	0	0	0	0	0	0	0	0	0	0	0	0	0	0	0	5777	0
OTU41	Taxa29	Anseriformes	Anatidae	Anas	Anas_platyrhynchos	12919	0	0	0	0	0	2063	0	0	0	0	0	0	0	0	0	0	0	2773	0	0	0	0	0	0	0	0	0	0	0	0	0	0	0	0	0	0	0	0	0	0	0	0	0
OTU33	Taxa30	Passeriformes	Prunellidae	Prunella	Prunella_modularis	11825	0	0	0	0	0	0	0	0	0	0	0	0	0	0	0	0	0	0	0	0	0	0	0	0	0	0	0	0	0	0	0	0	0	0	0	0	0	0	0	0	0	0	0
OTU34	Taxa31	Passeriformes	Regulidae	Regulus	Regulus_regulus	10517	0	0	0	0	0	0	0	0	0	0	0	0	0	0	0	0	0	0	0	0	0	1404	0	0	0	0	0	0	0	0	0	0	0	0	0	0	0	0	0	0	0	0	0
OTU37	Taxa32	Columbiformes	Columbidae	Columba	Columba_livia	9759	0	0	0	0	0	0	0	0	0	0	0	0	0	0	0	0	0	0	0	0	0	0	0	0	0	0	0	0	0	0	0	0	0	0	0	0	0	0	0	0	0	0	0
OTU38	Taxa33	Anseriformes	Anatidae	Somateria	Somateria_spp.	9338	0	0	0	0	0	0	0	0	0	0	0	0	0	0	0	0	0	0	0	0	0	0	0	0	0	0	0	0	0	0	0	0	0	0	0	0	0	0	4300	0	0	0	0
OTU40	Taxa34	Passeriformes	Hirundinidae	Delichon	Delichon_urbicum	9094	0	0	0	0	0	0	0	0	0	0	0	0	0	0	0	9094	0	0	0	0	0	0	0	0	0	0	0	0	0	0	0	0	0	0	0	0	0	0	0	0	0	0	0
OTU43	Taxa35	Accipitriformes	Accipitridae	Buteo	Buteo_buteo	7550	0	0	0	0	0	0	0	0	0	0	0	0	0	0	0	0	0	0	0	0	0	0	0	0	0	0	0	0	0	0	0	0	0	0	0	0	0	0	0	0	0	0	0
OTU46	Taxa36	Passeriformes	Sylviidae	Sylvia	Sylvia_spp.	6066	0	0	0	0	0	0	6066	0	0	0	0	0	0	0	0	0	0	0	0	0	0	0	0	0	0	0	0	0	0	0	0	0	0	0	0	0	0	0	0	0	0	0	0
OTU47	Taxa37	Accipitriformes	Accipitridae	Accipiter	Accipiter_nisus	5649	0	0	0	0	0	0	0	0	0	0	0	0	0	0	0	0	0	0	0	0	0	0	0	0	0	0	0	0	0	0	0	0	0	0	0	0	0	0	0	0	0	0	0
OTU45	Taxa38	Passeriformes	Sturnidae	Sturnus	Sturnus_vulgaris	5315	0	0	0	0	0	0	0	0	0	0	0	1903	0	0	0	0	0	0	0	0	0	0	0	0	0	0	0	0	0	0	0	0	0	0	0	0	0	0	0	0	0	0	0
OTU55	Taxa39	Columbiformes	Columbidae	N/A	N/A	4435	0	0	0	0	0	0	0	0	0	0	0	0	0	0	0	0	0	0	0	0	0	0	0	0	0	0	4435	0	0	0	0	0	0	0	0	0	0	0	0	0	0	0	0
OTU56	Taxa40	Suliformes	Sulidae	Morus	Morus_spp.	2835	0	0	0	0	0	0	0	0	0	0	0	0	0	0	0	0	0	0	0	0	0	0	0	0	0	0	0	0	0	0	0	0	0	0	0	0	0	0	0	0	0	0	0
OTU50	Taxa41	Passeriformes	Paridae	Poecile	Poecile_spp.	2771	0	0	0	0	0	0	0	0	0	0	0	0	0	0	0	0	0	0	0	0	0	0	0	0	0	0	0	0	0	0	0	0	0	0	0	0	0	0	0	0	2771	0	0
OTU58	Taxa42	Psittaciformes	Psittaculidae	Melopsittacus	Melopsittacus_undulatus	2330	0	0	0	0	0	0	0	0	0	0	0	0	0	0	2330	0	0	0	0	0	0	0	0	0	0	0	0	0	0	0	0	0	0	0	0	0	0	0	0	0	0	0	0
OTU57	Taxa43	Piciformes	Picidae	Picus	Picus_viridis	2140	0	0	0	0	0	0	0	0	0	0	0	0	0	0	0	0	0	0	0	0	0	0	0	0	0	0	0	0	0	0	0	0	0	0	0	0	0	0	0	0	0	0	762
OTU77	Taxa44	Columbiformes	Columbidae	Columba	Columba_spp.	1048	0	0	0	0	0	0	0	0	0	0	0	0	0	0	0	0	0	0	0	0	0	0	0	0	0	0	0	0	0	0	0	0	0	0	0	0	0	0	0	0	0	0	0
OTU87	Taxa45	Passeriformes	Troglodytidae	Troglodytes	Troglodytes_spp.	396	0	0	0	0	0	0	0	0	0	0	0	0	0	0	0	0	0	0	0	0	0	0	0	0	0	0	0	0	0	0	0	0	0	0	0	0	0	0	0	0	0	0	0
[truncated: 78 more columns]

## Sheet: 16Smam OTU table (exp3)
OTU	Class	Order	Family	Genus	Species	AF79	AF92	AF127	AF151	AF130	AF128	AF153	AF75	AF48	AF86	AF173	AF39	AF143	AF2	AF110	AF21	AF133	AF96	AF152	AF76	AF181	AF52	AF62	AF15	AF140	AF115	AF13	AF90	AF103	AF34	AF138	AF111	AF27	AF37	AF12	AF95	AF113	AF67	AF3	AF53	AF87	AF114	AF35	AF73
OTU1	Mammalia	Artiodactyla	Suidae	Sus	Sus_scrofa	196568	174240	159676	150142	145796	146426	144217	139486	120156	117349	115900	115671	112955	106313	109180	109374	109597	108934	107498	106686	105317	104120	105074	106547	104295	102179	102279	101172	101113	101801	98833	99069	101736	96514	96614	92583	93222	90718	90755	92851	88571	87126	87045	86029
OTU10	Mammalia	Artiodactyla	Bovidae	Bos	Bos_taurus	0	1931	0	0	0	0	0	0	0	0	0	5183	0	0	0	0	0	0	0	0	0	7417	0	0	15355	0	0	0	0	0	0	0	0	0	0	2185	0	3338	0	0	3083	0	0	0
OTU100	Mammalia	Carnivora	Canidae	Canis	Canis_lupus_familiaris	0	0	0	0	0	0	0	0	0	0	0	0	0	0	0	0	0	0	0	0	0	0	0	0	0	0	0	0	0	0	0	0	0	0	0	0	0	0	0	0	0	0	0	0
OTU101	Mammalia	Primates	Hominidae	Homo	Homo_sapiens	0	0	0	0	0	0	0	0	0	0	0	0	0	0	0	0	0	0	0	0	0	0	0	0	0	0	0	0	0	0	0	0	0	0	0	0	0	0	0	0	0	0	0	0
OTU103	Mammalia	Artiodactyla	Suidae	Sus	Sus_scrofa	0	0	0	0	0	41	0	0	0	0	0	0	0	0	0	0	0	0	0	0	0	0	0	0	0	0	0	0	0	0	0	0	0	0	27	0	0	0	0	0	0	0	0	0
OTU105	Mammalia	Primates	Hominidae	Homo	Homo_sapiens	0	0	0	0	0	0	0	0	0	0	0	0	0	0	0	0	0	0	0	0	0	0	0	0	0	0	0	0	0	0	0	0	0	0	0	0	0	0	0	0	0	0	0	0
OTU107	Mammalia	Primates	Hominidae	Homo	Homo_sapiens	0	0	0	0	0	0	0	0	0	0	0	0	0	0	0	0	0	0	0	0	0	0	0	0	0	0	0	0	0	0	0	0	0	0	0	0	0	0	0	0	0	0	0	0
OTU108	Mammalia	Primates	Hominidae	Homo	Homo_sapiens	0	0	0	0	0	0	0	0	0	0	0	0	0	0	0	0	0	0	0	0	0	0	0	0	0	0	0	0	0	0	0	0	0	0	0	0	0	0	0	0	0	0	0	0
OTU109	Mammalia	Carnivora	Canidae	Canis	Canis_lupus_familiaris	0	0	0	0	0	0	0	0	0	0	0	0	0	0	0	0	0	0	0	0	0	0	0	0	0	0	0	0	0	0	0	0	0	0	0	0	0	0	0	0	0	0	0	0
OTU11	Mammalia	Artiodactyla	Bovidae	Bos	Bos_taurus	0	1116	0	0	0	0	0	0	0	0	0	2994	0	0	0	0	0	0	0	0	0	6409	0	0	14645	0	0	0	0	0	0	0	0	0	0	2045	0	3179	0	0	1472	0	0	0
OTU111	Mammalia	Carnivora	Canidae	Canis	Canis_lupus_familiaris	0	0	0	0	0	0	0	0	0	0	0	0	0	0	0	0	0	0	0	0	0	0	0	0	0	0	0	0	0	0	0	0	0	0	0	0	0	0	0	0	0	0	0	0
OTU112	Mammalia	Primates	Hominidae	Homo	Homo_sapiens	0	0	0	0	0	0	0	0	0	0	0	0	0	0	0	0	0	0	0	0	0	0	0	0	0	0	0	0	0	0	0	0	0	0	0	0	0	0	0	0	0	0	0	0
OTU115	Mammalia	Primates	N/A	N/A	N/A	0	0	0	0	0	0	0	0	0	0	0	0	0	0	0	0	0	0	0	0	0	0	0	0	0	0	0	0	0	0	0	0	0	0	0	0	0	0	0	0	0	0	0	0
OTU116	Mammalia	Primates	Hominidae	Homo	Homo_sapiens	0	0	0	0	0	0	0	0	0	0	0	0	0	0	0	0	0	0	0	0	0	0	0	0	0	0	0	0	0	0	0	0	0	0	0	0	0	0	0	0	0	0	0	0
OTU117	Mammalia	Primates	Hominidae	Homo	Homo_sapiens	0	0	0	0	0	0	0	0	0	0	0	0	0	0	0	0	0	0	0	0	0	0	0	0	0	0	0	0	0	0	0	0	0	0	0	0	0	0	0	0	0	0	0	0
OTU118	Mammalia	Carnivora	Canidae	Canis	Canis_lupus_familiaris	0	0	0	0	0	0	0	0	0	0	0	0	0	0	0	0	0	0	0	0	0	0	0	0	0	0	0	0	0	0	0	0	0	0	0	0	0	0	0	0	0	0	0	0
OTU119	Mammalia	Primates	Hominidae	N/A	N/A	0	0	0	0	0	0	0	0	0	0	0	0	0	0	0	0	0	0	0	0	0	0	0	0	0	0	0	0	0	0	0	0	0	0	0	0	0	0	0	0	0	0	0	0
OTU12	Mammalia	Primates	Hominidae	Homo	Homo_sapiens	0	0	1778	1796	0	0	0	0	0	0	0	0	10016	0	0	0	0	0	0	0	0	0	0	0	0	0	0	0	0	0	0	0	0	0	0	0	0	0	1309	0	0	0	1214	0
OTU120	Mammalia	Carnivora	Canidae	Canis	Canis_lupus_familiaris	0	0	0	0	0	0	0	0	0	0	0	0	0	0	0	0	0	0	0	0	0	0	0	0	0	0	0	0	0	0	0	0	0	0	0	0	0	0	0	0	0	0	0	0
OTU122	Aves	Passeriformes	Corvidae	Pica	Pica_pica	0	0	0	0	0	0	0	0	0	0	0	0	0	0	0	0	0	0	0	0	0	0	0	0	0	0	0	0	0	0	0	0	0	0	0	0	0	0	0	0	0	0	0	0
OTU123	Mammalia	Rodentia	Cricetidae	Microtus	Microtus_spp.	0	0	0	0	0	0	0	0	0	0	0	0	0	0	0	0	0	0	0	0	0	0	0	0	0	0	0	0	0	0	0	0	0	0	0	0	0	0	0	0	0	0	0	0
OTU124	Mammalia	Artiodactyla	Bovidae	Ovis	Ovis_spp.	0	0	0	0	0	0	0	0	0	0	0	0	0	0	0	0	0	0	0	64	0	0	0	0	0	0	0	0	0	0	0	0	0	0	0	0	0	0	0	0	0	0	0	0
OTU125	Mammalia	Primates	Hominidae	Homo	Homo_sapiens	0	0	0	0	0	0	0	0	0	0	0	0	0	0	0	0	0	0	0	0	0	0	0	0	0	0	0	0	0	0	0	0	0	0	0	0	0	0	0	0	0	0	0	0
OTU126	Mammalia	Carnivora	Canidae	Canis	Canis_lupus_familiaris	0	0	0	0	0	0	0	0	0	0	0	0	0	0	0	0	0	0	0	0	0	0	0	0	0	0	0	0	0	0	0	0	0	0	0	0	0	0	0	0	0	0	0	0
OTU127	Aves	Passeriformes	Corvidae	Garrulus	Garrulus_glandarius	0	0	0	0	0	0	0	0	0	0	0	0	0	0	0	0	0	0	0	0	0	0	0	0	0	0	0	0	0	0	0	0	0	0	0	0	0	0	0	0	0	0	0	0
OTU128	Mammalia	Artiodactyla	Suidae	Sus	Sus_spp.	0	0	0	0	36	0	0	0	0	0	0	0	0	0	0	0	0	0	0	28	0	0	0	0	0	0	0	0	0	0	0	0	0	0	0	0	0	0	0	0	0	0	0	0
OTU129	Mammalia	Primates	Hominidae	Homo	Homo_spp.	0	0	0	0	0	0	0	0	0	0	0	0	0	0	0	0	0	0	0	0	0	0	0	0	0	0	0	0	0	0	0	0	0	0	0	0	0	0	0	0	0	0	0	0
OTU13	Mammalia	Artiodactyla	Cervidae	Cervus	Cervus_elaphus	0	2440	0	0	12948	0	0	0	0	0	0	0	0	2035	0	2234	0	0	0	0	0	0	0	0	0	0	0	0	0	0	0	0	0	24054	0	9988	0	0	0	0	16017	0	0	0
OTU130	Mammalia	Primates	N/A	N/A	N/A	0	0	0	0	0	0	0	0	0	0	0	0	0	0	0	0	0	0	0	0	0	0	0	0	0	0	0	0	0	0	0	0	0	0	0	0	0	0	0	0	0	0	0	0
OTU131	Mammalia	Carnivora	Canidae	Canis	Canis_lupus_familiaris	0	0	0	0	0	0	0	0	0	0	0	0	0	0	0	0	0	0	0	35	0	0	0	0	0	0	0	0	0	0	0	0	0	0	0	0	0	0	0	0	0	0	0	0
OTU132	Mammalia	Carnivora	Canidae	Canis	Canis_spp.	0	0	0	0	0	0	0	0	0	0	0	0	0	0	0	0	0	0	0	0	0	0	0	0	0	0	0	0	0	0	0	0	0	0	0	0	0	0	0	0	0	0	0	0
OTU133	Mammalia	Primates	N/A	N/A	N/A	0	0	0	0	0	0	0	0	0	0	0	0	0	0	0	0	0	0	0	0	0	0	0	0	0	0	0	0	0	0	0	0	0	0	0	0	0	0	0	0	0	0	0	0
OTU134	Mammalia	Carnivora	Canidae	Canis	Canis_lupus_familiaris	0	0	0	0	0	0	0	0	0	0	0	0	0	0	0	0	0	0	0	0	0	0	0	0	0	0	0	0	0	0	0	0	0	0	0	0	0	0	0	0	0	0	0	0
OTU135	Mammalia	Artiodactyla	Suidae	Sus	Sus_scrofa	0	0	0	0	0	0	0	0	0	0	0	0	0	0	0	0	0	0	0	0	0	0	0	0	0	0	0	0	0	0	0	0	0	0	0	0	0	0	0	0	0	0	0	0
OTU136	Mammalia	Primates	Hominidae	Homo	Homo_spp.	0	0	0	0	0	0	0	0	0	0	0	0	0	0	0	0	0	0	0	0	0	0	0	0	0	0	0	0	0	0	0	0	0	0	0	0	0	0	0	0	0	0	0	0
OTU138	Mammalia	Primates	N/A	N/A	N/A	0	0	0	0	0	0	0	0	0	0	0	0	0	0	0	0	0	0	0	0	0	0	0	0	0	0	0	0	0	0	0	0	0	0	0	0	0	0	0	0	0	0	0	0
OTU139	Mammalia	Artiodactyla	Bovidae	Ovis	Ovis_spp.	0	0	0	0	0	0	0	0	0	0	0	0	0	0	0	0	0	0	0	26	0	0	0	0	0	0	0	0	0	0	0	0	0	0	0	0	0	0	0	0	0	0	0	0
OTU14	Mammalia	Primates	Hominidae	Pan	Pan_troglodytes	0	0	0	1322	0	0	0	0	0	0	0	0	2478	0	0	0	0	0	0	0	0	0	0	0	0	0	0	0	0	0	0	0	0	0	0	0	0	0	0	0	0	0	730	0
OTU141	Mammalia	Artiodactyla	Suidae	Sus	Sus_scrofa	0	0	0	0	0	0	0	0	0	0	0	0	0	0	0	0	0	0	0	0	0	0	0	0	0	0	0	0	0	0	0	0	0	0	0	0	0	0	0	0	0	0	0	0
OTU143	Mammalia	Primates	N/A	N/A	N/A	0	0	0	0	0	0	0	0	0	0	0	0	0	0	0	0	0	0	0	0	0	0	0	0	0	0	0	0	0	0	0	0	0	0	0	0	0	0	0	0	0	0	0	0
OTU15	Mammalia	Artiodactyla	Cervidae	Cervus	Cervus_elaphus	0	1822	0	0	12587	0	0	0	0	0	0	0	0	2149	0	1113	0	0	0	0	0	0	0	0	0	0	0	0	0	0	0	0	0	19068	0	7018	0	0	0	0	13913	0	0	0
OTU16	Mammalia	Primates	Hominidae	Pan	Pan_troglodytes	0	0	0	1304	0	0	0	0	0	0	0	0	2460	0	0	0	0	0	0	0	0	0	0	0	0	0	0	0	0	0	0	0	0	0	0	0	0	0	0	0	0	0	446	0
OTU17	Mammalia	Rodentia	Muridae	Apodemus	Apodemus_flavicollis	0	0	0	0	0	20076	0	0	0	0	4211	0	0	0	0	0	0	0	0	0	0	0	0	0	0	0	0	0	0	0	0	0	0	0	38133	0	5205	0	0	0	0	0	0	0
OTU18	Mammalia	Rodentia	Muridae	Mus	Mus_spp.	0	0	0	0	0	0	0	0	0	0	0	0	0	0	0	0	0	0	0	0	0	0	0	0	0	0	0	0	0	0	6285	0	0	0	0	0	0	0	0	0	0	0	0	0
OTU19	Amphibia	Anura	Bufonidae	Bufo	Bufo_bufo	0	0	0	0	0	0	0	0	0	0	0	0	0	0	0	0	0	0	2563	0	0	3743	0	1346	0	2690	0	0	361	0	0	0	0	2367	0	0	0	0	1173	0	0	0	0	0
OTU2	Mammalia	Artiodactyla	Suidae	Sus	Sus_scrofa	144459	146317	153685	145090	143070	121439	111828	113628	95133	104621	90486	81439	110815	106072	105489	80368	104542	93481	103616	85546	81788	90184	88387	91889	89063	102630	78589	92128	83736	71474	86804	95280	89578	77463	77158	68851	77791	85794	78776	77659	74363	84141	70865	67421
OTU20	Mammalia	Artiodactyla	Bovidae	Bison	Bison_bonasus	0	0	0	0	0	0	0	0	0	0	0	0	0	0	0	0	0	0	0	0	0	0	0	0	0	0	0	0	0	0	0	0	0	0	6615	0	0	0	0	0	0	0	0	0
OTU21	Mammalia	Rodentia	Muridae	Apodemus	Apodemus_flavicollis	0	0	0	0	0	17807	0	0	0	0	4138	0	0	0	0	0	0	0	0	0	0	0	0	0	0	0	0	0	0	0	0	0	0	0	28661	0	5289	0	0	0	0	0	0	0
OTU22	Mammalia	Primates	Hominidae	Homo	Homo_sapiens	0	0	0	562	0	0	0	0	0	0	0	0	3812	0	0	0	0	0	0	0	0	0	0	0	0	0	0	0	0	0	0	0	0	0	0	0	0	0	0	0	0	0	1030	0
OTU25	Amphibia	Anura	Bufonidae	Bufo	Bufo_bufo	0	0	0	0	0	0	0	0	0	0	0	0	0	0	0	0	0	0	2529	0	0	3436	0	1351	0	2727	0	0	341	0	0	0	0	0	0	0	0	0	1170	0	0	0	0	0
OTU26	Mammalia	Primates	Hominidae	Homo	Homo_sapiens	0	0	0	479	0	0	0	0	0	0	0	0	3731	0	0	0	0	0	0	0	0	0	0	0	0	0	0	0	0	0	0	0	0	0	0	0	0	0	0	0	0	0	786	0
OTU27	Mammalia	Rodentia	Cricetidae	Microtus	Microtus_agrestis	0	0	0	0	0	0	0	0	0	0	0	0	0	0	10165	0	0	0	0	0	0	0	0	0	0	0	0	0	0	0	8609	0	0	0	0	0	0	0	0	0	0	0	0	0
OTU28	Mammalia	Artiodactyla	Suidae	Sus	Sus_scrofa	0	803	0	0	727	2156	0	0	0	6785	2263	0	2722	318	0	0	0	0	2865	876	0	0	294	0	0	0	0	662	0	0	0	0	0	0	0	0	0	0	655	0	0	0	0	0
OTU29	Mammalia	Primates	Hominidae	Homo	Homo_sapiens	0	0	0	400	0	0	0	0	0	0	0	0	400	0	0	0	0	0	0	0	0	430	0	0	0	0	0	0	0	0	0	0	0	0	0	0	0	0	120	0	0	0	1126	0
OTU3	Mammalia	Carnivora	Canidae	Canis	Canis_lupus_familiaris	5719	755	41670	0	0	0	10297	0	0	14141	0	15352	4707	0	10033	10439	6795	6172	2020	43306	0	4452	565	5174	0	0	0	0	1463	10299	5537	10279	3914	15713	0	6572	6304	3388	42608	2214	5493	8647	0	5455
OTU31	Mammalia	Chiroptera	Vespertilionidae	Pipistrellus	Pipistrellus_pygmaeus	0	0	0	0	0	0	0	0	0	0	0	0	0	0	0	0	0	0	0	0	0	0	0	0	0	0	0	0	0	27232	0	0	0	0	0	0	0	0	0	0	0	0	0	0
OTU32	Mammalia	Artiodactyla	Suidae	Sus	Sus_scrofa	0	626	0	0	696	1584	0	0	0	5921	2188	0	2724	316	0	0	0	0	2746	499	0	0	0	0	0	0	0	0	0	0	0	0	0	0	0	0	0	0	414	0	0	0	0	0
OTU33	Mammalia	Artiodactyla	Bovidae	Capra	Capra_spp.	0	0	0	0	0	0	0	0	0	0	0	0	0	0	0	0	0	0	0	0	0	0	0	0	0	0	0	0	0	0	0	0	0	0	0	0	0	0	0	0	0	0	0	0
OTU34	Mammalia	Primates	Hominidae	Homo	Homo_sapiens	0	0	0	361	0	0	0	0	0	0	0	0	373	0	0	0	0	0	0	0	0	0	0	0	0	0	0	0	0	0	0	0	0	0	0	0	0	0	0	0	0	0	1001	0
OTU35	Mammalia	Artiodactyla	Bovidae	Ovis	Ovis_spp.	0	0	0	0	0	0	0	0	0	0	0	0	0	0	0	0	0	0	0	29524	0	0	0	0	0	0	0	0	0	0	0	0	10198	0	0	0	0	0	0	0	0	0	0	0
OTU38	Mammalia	Rodentia	Sciuridae	Sciurus	Sciurus_vulgaris	7799	0	0	4612	0	0	0	0	0	0	0	0	0	0	0	0	0	0	0	0	0	0	0	0	0	0	0	0	0	0	0	0	0	0	0	0	0	0	0	0	0	0	0	0
OTU39	Mammalia	Rodentia	Muridae	Apodemus	Apodemus_sylvaticus	0	0	0	0	0	0	0	0	0	0	0	0	0	0	0	0	0	0	0	0	0	0	0	0	0	0	0	0	0	0	0	0	0	0	0	0	0	0	0	0	0	0	0	0
OTU4	Mammalia	Carnivora	Canidae	Canis	Canis_lupus_familiaris	4082	488	40530	0	0	0	9022	0	0	12842	0	13354	4496	0	9888	6157	6460	5522	1960	34823	0	3899	545	5060	0	0	0	0	1394	10860	4773	9616	3712	11627	0	4785	5353	2069	35325	2094	3391	8577	0	3327
OTU40	Mammalia	Eulipotyphla	Erinaceidae	Erinaceus	Erinaceus_europaeus	0	0	0	0	0	16726	0	0	0	0	0	0	0	0	0	0	0	0	0	0	0	0	0	0	0	0	0	0	0	0	0	0	0	0	0	0	0	10924	0	0	0	0	0	0
OTU41	Mammalia	Chiroptera	Vespertilionidae	Myotis	Myotis_spp.	0	0	0	0	0	0	0	0	0	0	0	0	0	0	0	0	0	0	0	0	0	0	0	0	0	0	0	0	0	0	0	0	0	0	0	0	0	0	0	0	0	0	0	0
OTU45	Mammalia	Primates	Hominidae	Homo	Homo_sapiens	0	0	0	0	0	0	0	0	0	0	0	0	233	0	0	0	0	0	0	0	0	0	0	0	0	0	0	0	0	0	0	0	0	0	0	0	0	0	0	0	0	0	0	0
OTU46	Mammalia	Carnivora	Canidae	Canis	Canis_lupus_familiaris	0	0	0	0	0	0	0	0	0	0	0	0	0	0	0	0	0	0	0	0	0	0	0	0	0	0	0	0	0	0	0	0	0	0	0	0	0	0	0	0	0	0	0	0
OTU47	Mammalia	Primates	Hominidae	Homo	Homo_sapiens	0	0	0	0	0	0	0	0	0	0	0	0	0	0	0	0	0	0	0	0	0	0	0	0	0	0	0	0	0	0	0	0	0	0	0	0	0	0	0	0	0	0	0	0
OTU49	Mammalia	Carnivora	Canidae	Canis	Canis_lupus_familiaris	0	0	0	0	0	0	0	0	0	0	0	0	0	0	0	0	0	0	0	0	0	0	0	0	0	0	0	0	0	0	0	0	0	0	0	0	0	0	0	0	0	0	0	0
OTU5	Mammalia	Chiroptera	Phyllostomidae	Desmodus	Desmodus_rotundus	0	0	0	0	0	0	0	0	0	0	0	0	0	0	0	0	0	0	0	0	0	0	0	0	0	0	0	0	0	0	0	0	0	0	0	0	0	0	0	0	0	0	0	0
OTU50	Mammalia	Primates	Hominidae	Homo	Homo_sapiens	0	0	0	0	0	0	0	0	0	0	0	0	243	0	0	0	0	0	0	0	0	0	0	0	0	0	0	0	0	0	0	0	0	0	0	0	0	0	0	0	0	0	0	0
OTU52	Mammalia	Carnivora	Canidae	Canis	Canis_lupus_familiaris	0	0	0	0	0	0	0	0	0	0	0	0	0	0	0	0	0	0	0	0	0	0	0	0	0	0	0	0	0	0	2425	0	0	0	0	0	0	0	0	0	0	0	0	0
OTU54	Mammalia	Primates	Hominidae	Homo	Homo_sapiens	0	0	0	0	0	0	0	0	0	0	0	0	0	0	0	0	0	0	0	0	0	0	0	0	0	0	0	0	0	0	0	0	0	0	0	0	0	0	0	0	0	0	0	0
OTU57	Mammalia	Perissodactyla	Equidae	Equus	Equus_caballus	0	0	0	0	0	0	0	0	0	0	0	0	0	0	0	0	0	0	0	0	0	0	0	0	0	0	0	0	0	0	0	0	0	0	5419	0	0	0	0	0	0	0	0	0
OTU59	Mammalia	Carnivora	Canidae	Canis	Canis_lupus_familiaris	0	0	0	0	0	0	0	0	0	0	0	0	0	0	0	0	0	0	0	0	0	0	0	0	0	0	0	0	0	0	0	0	0	0	0	0	0	0	0	0	0	0	0	0
OTU60	Mammalia	Carnivora	Canidae	Vulpes	Vulpes_vulpes	0	0	0	0	0	0	0	0	0	0	0	0	0	0	0	0	0	0	0	0	0	0	0	0	0	0	0	0	0	0	0	0	0	0	0	0	0	0	0	0	0	0	0	0
OTU61	Mammalia	Carnivora	Canidae	Canis	Canis_lupus_familiaris	0	0	0	0	0	0	0	0	0	0	0	0	0	0	0	0	0	0	0	0	0	0	0	0	0	0	0	0	0	0	0	0	0	0	0	0	0	0	0	0	0	0	0	0
OTU62	Mammalia	Carnivora	Canidae	Canis	Canis_lupus_familiaris	0	0	0	0	0	0	0	0	0	0	0	0	0	0	0	0	0	0	0	0	0	0	0	0	0	0	0	0	0	0	0	0	0	0	0	0	0	0	0	0	0	0	0	0
OTU63	Mammalia	Artiodactyla	Suidae	Sus	Sus_scrofa	323	529	0	53	125	0	0	0	0	0	48	0	0	0	0	1464	0	146	0	64	0	0	0	0	0	240	0	0	0	0	0	0	295	68	0	49	0	0	0	227	70	0	0	0
OTU64	Mammalia	Carnivora	Canidae	Canis	Canis_lupus_familiaris	0	0	0	0	0	0	0	0	0	0	0	0	0	0	0	0	0	0	0	0	0	0	0	0	0	0	0	0	0	0	0	0	0	0	0	0	0	0	0	0	0	0	0	0
OTU66	Mammalia	Artiodactyla	Suidae	Sus	Sus_scrofa	280	493	0	53	131	0	0	0	0	0	0	0	0	0	0	1545	0	143	0	45	0	0	0	0	0	250	0	0	0	0	0	0	278	56	0	0	0	0	0	225	61	0	0	0
OTU67	Mammalia	Rodentia	Cricetidae	Microtus	Microtus_arvalis	0	0	0	0	0	0	0	0	0	0	0	0	0	0	0	0	0	0	0	0	0	0	0	0	0	0	0	0	0	0	0	0	0	0	0	0	0	0	0	0	0	0	0	0
OTU69	Mammalia	Eulipotyphla	Soricidae	Sorex	Sorex_araneus	0	0	0	0	0	0	0	0	0	0	0	0	0	0	0	0	0	0	0	0	0	0	0	0	0	0	0	0	0	0	0	0	0	0	0	5965	0	0	0	0	0	0	0	0
OTU7	Mammalia	Rodentia	Cricetidae	Myodes	Myodes_glareolus	0	0	0	0	0	0	0	11105	0	3051	0	0	8088	0	0	0	0	40678	0	0	0	15518	0	0	5920	21056	0	10823	2291	0	3679	0	0	7389	0	0	0	15816	0	0	4328	4688	16125	0
OTU70	Mammalia	Primates	Hominidae	N/A	N/A	0	0	0	0	0	0	0	0	0	0	0	0	0	0	0	0	0	0	0	0	0	0	0	0	260	0	0	0	0	0	0	0	0	0	0	0	0	0	0	0	0	0	0	0
OTU72	Mammalia	Primates	Hominidae	N/A	N/A	0	0	0	0	0	0	0	0	0	0	0	0	0	0	0	0	0	0	0	0	0	0	0	0	0	0	0	0	0	0	0	0	0	0	0	0	0	0	0	0	0	0	0	0
OTU73	Mammalia	Primates	Hominidae	Homo	Homo_sapiens	0	0	0	0	0	0	0	0	0	0	0	0	0	0	0	0	0	0	0	0	0	0	0	0	0	0	0	0	0	0	0	0	0	0	0	0	0	0	0	0	0	0	0	0
OTU74	Mammalia	Carnivora	Canidae	Canis	Canis_lupus_familiaris	0	0	0	0	0	0	0	0	0	0	0	0	0	0	0	0	0	0	0	0	0	0	0	0	0	0	0	0	0	0	0	0	0	0	0	0	0	0	0	0	0	0	0	0
OTU76	Mammalia	Primates	Hominidae	Homo	Homo_sapiens	0	0	0	0	0	0	0	0	0	0	0	0	0	0	0	0	0	0	0	0	0	0	0	0	0	0	0	0	0	0	0	0	0	0	0	0	0	0	0	0	0	0	0	0
OTU77	Mammalia	Primates	Hominidae	Homo	Homo_sapiens	0	0	0	0	0	0	0	0	0	0	0	0	0	0	0	0	0	0	0	0	0	0	0	0	0	0	0	0	0	0	0	0	0	0	0	0	0	0	0	0	0	0	0	0
OTU79	Mammalia	Primates	Hominidae	Homo	Homo_sapiens	0	0	0	0	0	0	0	0	0	0	0	0	0	0	0	0	0	0	0	0	0	0	0	0	0	0	0	0	0	0	0	0	0	0	0	0	0	0	0	0	0	0	0	0
OTU8	Mammalia	Rodentia	Cricetidae	Myodes	Myodes_glareolus	0	0	0	0	0	0	0	9888	0	3010	0	0	8179	0	0	0	0	34605	0	0	0	14531	0	0	4640	21020	0	9262	2199	0	3528	0	0	6600	0	0	0	14193	0	0	1324	4684	13206	0
OTU81	Mammalia	Primates	Hominidae	Homo	Homo_sapiens	0	0	0	0	0	0	0	0	0	0	0	0	0	0	0	0	0	0	0	0	0	0	0	0	0	0	0	0	0	0	0	0	0	0	0	0	0	0	0	0	0	0	0	0
OTU82	Aves	Passeriformes	Corvidae	Corvus	Corvus_corax	0	0	0	0	0	0	0	0	0	0	0	0	0	0	0	0	0	0	0	0	0	0	0	0	0	0	0	0	0	0	0	0	0	0	0	0	0	0	0	0	0	0	0	0
OTU83	Mammalia	Artiodactyla	Cervidae	Cervus	Cervus_spp.	0	0	0	0	138	0	0	0	0	0	0	0	0	0	0	0	0	0	0	0	0	0	0	0	0	0	0	0	0	0	0	0	0	58	0	39	0	0	0	0	32	0	0	0
OTU84	Mammalia	Artiodactyla	Suidae	Sus	Sus_spp.	0	0	0	0	0	0	0	0	0	0	0	0	0	0	0	0	0	0	0	64	0	0	0	0	0	0	0	0	0	0	0	0	0	0	0	0	0	0	38	0	0	0	0	0
OTU85	Mammalia	Primates	Hominidae	Homo	Homo_sapiens	0	0	0	0	0	0	0	0	0	0	0	0	0	0	0	0	0	0	0	0	0	0	0	0	0	0	0	0	0	0	0	0	0	0	0	0	0	0	0	0	0	0	0	0
OTU87	Mammalia	Primates	Hominidae	Homo	Homo_sapiens	0	0	0	0	0	0	0	0	0	0	0	0	0	0	0	0	0	0	0	0	0	0	0	0	0	0	0	0	0	0	0	0	0	0	0	0	0	0	0	0	0	0	0	0
OTU88	Mammalia	Carnivora	Canidae	Canis	Canis_lupus_familiaris	0	0	0	0	0	0	0	0	0	0	0	0	0	0	0	0	0	0	0	0	0	0	0	0	0	0	0	0	0	0	0	0	0	0	0	0	0	0	0	0	0	0	0	0
OTU89	Mammalia	Primates	N/A	N/A	N/A	0	0	0	0	0	0	0	0	0	0	0	0	0	0	0	0	0	0	0	0	0	0	0	0	0	0	0	0	0	0	0	0	0	0	0	0	0	0	0	0	0	0	0	0
OTU9	Mammalia	Primates	Hominidae	Homo	Homo_sapiens	0	0	1793	1812	0	0	0	0	0	0	0	0	9998	0	0	0	0	0	0	0	0	0	0	0	0	0	0	0	0	0	0	0	0	0	0	0	0	0	1787	0	0	0	1747	0
OTU90	Mammalia	Primates	N/A	N/A	N/A	0	0	0	0	0	0	0	0	0	0	0	0	0	0	0	0	0	0	0	0	0	0	0	0	0	0	0	0	0	0	0	0	0	0	0	0	0	0	0	0	0	0	0	0
OTU91	Mammalia	Carnivora	Canidae	Canis	Canis_familiaris	0	0	0	0	0	0	0	0	0	0	0	0	0	0	0	0	0	0	0	0	0	0	0	0	0	0	0	0	0	0	0	0	0	0	0	0	0	0	0	0	0	0	0	0
OTU92	Mammalia	Carnivora	Canidae	Canis	Canis_lupus_familiaris	0	0	0	0	0	0	0	0	0	0	0	0	0	0	0	0	0	0	0	51	0	0	0	0	0	0	0	0	0	0	0	0	0	0	0	0	0	0	30	0	0	0	0	0
OTU93	Mammalia	Primates	N/A	N/A	N/A	0	0	0	0	0	0	0	0	0	0	0	0	0	0	0	0	0	0	0	0	0	0	0	0	0	0	0	0	0	0	0	0	0	0	0	0	0	0	0	0	0	0	0	0
OTU94	Mammalia	Primates	N/A	N/A	N/A	0	0	0	0	0	0	0	0	0	0	0	0	0	0	0	0	0	0	0	0	0	0	0	0	0	0	0	0	0	0	0	0	0	0	0	0	0	0	0	0	0	0	0	0
OTU95	Mammalia	Carnivora	Canidae	Canis	Canis_lupus_familiaris	0	0	0	0	0	0	0	0	0	0	0	0	0	0	0	0	0	0	0	0	0	0	0	0	0	0	0	0	0	0	0	0	0	0	0	0	0	0	0	0	0	0	0	0
OTU97	Mammalia	Artiodactyla	Suidae	Sus	Sus_spp.	0	143	0	0	0	0	0	0	0	0	0	0	0	0	0	24	0	0	0	0	0	0	0	0	0	0	0	0	0	0	0	0	0	0	0	0	0	0	0	0	0	0	0	0
OTU98	Mammalia	Artiodactyla	Suidae	Sus	Sus_spp.	0	89	0	0	0	0	0	0	0	0	0	0	0	0	0	0	0	0	0	0	0	0	0	0	0	0	0	0	0	0	0	0	0	0	0	0	0	0	0	0	0	0	0	0
OTU99	Mammalia	Primates	Hominidae	Homo	Homo_spp.	0	0	0	0	0	0	0	0	0	0	0	0	0	0	0	0	0	0	0	0	0	0	0	0	0	0	0	0	0	0	0	0	0	0	0	0	0	0	0	0	0	0	0	0
[truncated: 134 more columns]

## Sheet: 16S mam Taxa table
OTU	Taxa	Class	Order	Family	Genus	Species	Sum	AF79	AF92	AF127	AF151	AF130	AF128	AF153	AF75	AF48	AF86	AF173	AF39	AF143	AF2	AF110	AF21	AF133	AF96	AF152	AF76	AF181	AF52	AF62	AF15	AF140	AF115	AF13	AF90	AF103	AF34	AF138	AF111	AF27	AF37	AF12	AF95	AF113	AF67	AF3	AF53	AF87	AF114
OTU1_103_135_141_2_28_32_63_66	Tax1	Mammalia	Artiodactyla	Suidae	Sus	Sus_scrofa	16448655	341630	323008	313361	295338	290545	271646	256045	253114	215289	234676	210885	197110	229216	213019	214669	192751	214139	202704	216725	193716	187105	194304	193755	198436	193358	205299	180868	193962	184849	173275	185637	194349	191887	174101	173799	161483	171013	176512	170600	170962	163065	171267
OTU111_91_100_109_118_3_4_46_49_52_59_61_62_64_74_88_120_126_131_134_92_95	Tax2	Mammalia	Carnivora	Canidae	Canis	Canis_lupus_familiaris	5526262	9801	1243	82200	0	0	0	19319	0	0	26983	0	28706	9203	0	19921	16596	13255	11694	3980	78215	0	8351	1110	10234	0	0	0	0	2857	21159	12735	19895	7626	27340	0	11357	11657	5457	77963	4308	8884	17224
OTU101_105_107_108_112_116_117_12_125_22_26_29_34_45_47_50_54_73_76_77_79_81_85_87_9	Tax4	Mammalia	Primates	Hominidae	Homo	Homo_sapiens	692026	0	0	3571	5410	0	0	0	0	0	0	0	0	28806	0	0	0	0	0	0	0	0	430	0	0	0	0	0	0	0	0	0	0	0	0	0	0	0	0	3216	0	0	0
OTU7_8	Tax5	Mammalia	Rodentia	Cricetidae	Myodes	Myodes_glareolus	610733	0	0	0	0	0	0	0	20993	0	6061	0	0	16267	0	0	0	0	75283	0	0	0	30049	0	0	10560	42076	0	20085	4490	0	7207	0	0	13989	0	0	0	30009	0	0	5652	9372
OTU10_11	Tax6	Mammalia	Artiodactyla	Bovidae	Bos	Bos_taurus	338295	0	3047	0	0	0	0	0	0	0	0	0	8177	0	0	0	0	0	0	0	0	0	13826	0	0	30000	0	0	0	0	0	0	0	0	0	0	4230	0	6517	0	0	4555	0
OTU13_15_83	Tax7	Mammalia	Artiodactyla	Cervidae	Cervus	Cervus_elaphus	214253	0	4262	0	0	25673	0	0	0	0	0	0	0	0	4184	0	3347	0	0	0	0	0	0	0	0	0	0	0	0	0	0	0	0	0	43180	0	17045	0	0	0	0	29962	0
OTU14_16	Tax8	Mammalia	Primates	Hominidae	Pan	Pan_troglodytes	190699	0	0	0	2626	0	0	0	0	0	0	0	0	4938	0	0	0	0	0	0	0	0	0	0	0	0	0	0	0	0	0	0	0	0	0	0	0	0	0	0	0	0	0
OTU_17_21	Tax9	Mammalia	Rodentia	Muridae	Apodemus	Apodemus_flavicollis	142717	0	0	0	0	0	37883	0	0	0	0	8349	0	0	0	0	0	0	0	0	0	0	0	0	0	0	0	0	0	0	0	0	0	0	0	66794	0	10494	0	0	0	0	0
OTU18	Tax10	Mammalia	Rodentia	Muridae	Mus	Mus_spp.	128778	0	0	0	0	0	0	0	0	0	0	0	0	0	0	0	0	0	0	0	0	0	0	0	0	0	0	0	0	0	0	6285	0	0	0	0	0	0	0	0	0	0	0
OTU20	Tax11	Mammalia	Artiodactyla	Bovidae	Bison	Bison_bonasus	123313	0	0	0	0	0	0	0	0	0	0	0	0	0	0	0	0	0	0	0	0	0	0	0	0	0	0	0	0	0	0	0	0	0	0	6615	0	0	0	0	0	0	0
OTU19_25	Tax12	Amphibia	Anura	Bufonidae	Bufo	Bufo_bufo	116835	0	0	0	0	0	0	0	0	0	0	0	0	0	0	0	0	0	0	5092	0	0	7179	0	2697	0	5417	0	0	702	0	0	0	0	2367	0	0	0	0	2343	0	0	0
OTU27_123	Tax13	Mammalia	Rodentia	Cricetidae	Microtus	Microtus_agrestis	99756	0	0	0	0	0	0	0	0	0	0	0	0	0	0	10165	0	0	0	0	0	0	0	0	0	0	0	0	0	0	0	8609	0	0	0	0	0	0	0	0	0	0	0
OTU33	Tax14	Mammalia	Artiodactyla	Bovidae	Capra	Capra_spp.	45843	0	0	0	0	0	0	0	0	0	0	0	0	0	0	0	0	0	0	0	0	0	0	0	0	0	0	0	0	0	0	0	0	0	0	0	0	0	0	0	0	0	0
OTU31	Tax15	Mammalia	Chiroptera	Vespertilionidae	Pipistrellus	Pipistrellus_pygmaeus	41249	0	0	0	0	0	0	0	0	0	0	0	0	0	0	0	0	0	0	0	0	0	0	0	0	0	0	0	0	0	27232	0	0	0	0	0	0	0	0	0	0	0	0
OTU124_139_35	Tax16	Mammalia	Artiodactyla	Bovidae	Ovis	Ovis_spp.	39812	0	0	0	0	0	0	0	0	0	0	0	0	0	0	0	0	0	0	0	29614	0	0	0	0	0	0	0	0	0	0	0	0	10198	0	0	0	0	0	0	0	0	0
OTU38	Tax17	Mammalia	Rodentia	Sciuridae	Sciurus	Sciurus_vulgaris	29764	7799	0	0	4612	0	0	0	0	0	0	0	0	0	0	0	0	0	0	0	0	0	0	0	0	0	0	0	0	0	0	0	0	0	0	0	0	0	0	0	0	0	0
OTU40	Tax18	Mammalia	Eulipotyphla	Erinaceidae	Erinaceus	Erinaceus_europaeus	27650	0	0	0	0	0	16726	0	0	0	0	0	0	0	0	0	0	0	0	0	0	0	0	0	0	0	0	0	0	0	0	0	0	0	0	0	0	0	10924	0	0	0	0
OTU39	Tax19	Mammalia	Rodentia	Muridae	Apodemus	Apodemus_sylvaticus	24901	0	0	0	0	0	0	0	0	0	0	0	0	0	0	0	0	0	0	0	0	0	0	0	0	0	0	0	0	0	0	0	0	0	0	0	0	0	0	0	0	0	0
OTU41	Tax20	Mammalia	Chiroptera	Vespertilionidae	Myotis	Myotis_spp.	23929	0	0	0	0	0	0	0	0	0	0	0	0	0	0	0	0	0	0	0	0	0	0	0	0	0	0	0	0	0	0	0	0	0	0	0	0	0	0	0	0	0	0
OTU57	Tax21	Mammalia	Perissodactyla	Equidae	Equus	Equus_caballus	13633	0	0	0	0	0	0	0	0	0	0	0	0	0	0	0	0	0	0	0	0	0	0	0	0	0	0	0	0	0	0	0	0	0	0	5419	0	0	0	0	0	0	0
OTU60	Tax22	Mammalia	Carnivora	Canidae	Vulpes	Vulpes_vulpes	9936	0	0	0	0	0	0	0	0	0	0	0	0	0	0	0	0	0	0	0	0	0	0	0	0	0	0	0	0	0	0	0	0	0	0	0	0	0	0	0	0	0	0
OTU67	Tax23	Mammalia	Rodentia	Cricetidae	Microtus	Microtus_arvalis	6994	0	0	0	0	0	0	0	0	0	0	0	0	0	0	0	0	0	0	0	0	0	0	0	0	0	0	0	0	0	0	0	0	0	0	0	0	0	0	0	0	0	0
OTU69	Tax24	Mammalia	Eulipotyphla	Soricidae	Sorex	Sorex_araneus	5965	0	0	0	0	0	0	0	0	0	0	0	0	0	0	0	0	0	0	0	0	0	0	0	0	0	0	0	0	0	0	0	0	0	0	0	5965	0	0	0	0	0	0
OTU119_70_72	Tax25	Mammalia	Primates	Hominidae	N/A	N/A	4948	0	0	0	0	0	0	0	0	0	0	0	0	0	0	0	0	0	0	0	0	0	0	0	0	260	0	0	0	0	0	0	0	0	0	0	0	0	0	0	0	0	0
OTU94_115_130_133_138_143_89_90_93_94	Tax26	Mammalia	Primates	N/A	N/A	N/A	1506	0	0	0	0	0	0	0	0	0	0	0	0	0	0	0	0	0	0	0	0	0	0	0	0	0	0	0	0	0	0	0	0	0	0	0	0	0	0	0	0	0	0
OTU128_84_97_98	Tax27	Mammalia	Artiodactyla	Suidae	Sus	Sus_spp.	546	0	232	0	0	36	0	0	0	0	0	0	0	0	0	0	24	0	0	0	92	0	0	0	0	0	0	0	0	0	0	0	0	0	0	0	0	0	0	38	0	0	0
OTU129_136_99	Tax28	Mammalia	Primates	Hominidae	Homo	Homo_spp.	304	0	0	0	0	0	0	0	0	0	0	0	0	0	0	0	0	0	0	0	0	0	0	0	0	0	0	0	0	0	0	0	0	0	0	0	0	0	0	0	0	0	0
OTU82	Tax29	Aves	Passeriformes	Corvidae	Corvus	Corvus_corax	273	0	0	0	0	0	0	0	0	0	0	0	0	0	0	0	0	0	0	0	0	0	0	0	0	0	0	0	0	0	0	0	0	0	0	0	0	0	0	0	0	0	0
OTU122	Tax30	Aves	Passeriformes	Corvidae	Pica	Pica_pica	44	0	0	0	0	0	0	0	0	0	0	0	0	0	0	0	0	0	0	0	0	0	0	0	0	0	0	0	0	0	0	0	0	0	0	0	0	0	0	0	0	0	0
OTU127	Tax31	Aves	Passeriformes	Corvidae	Garrulus	Garrulus_glandarius	37	0	0	0	0	0	0	0	0	0	0	0	0	0	0	0	0	0	0	0	0	0	0	0	0	0	0	0	0	0	0	0	0	0	0	0	0	0	0	0	0	0	0
OTU132	Tax32	Mammalia	Carnivora	Canidae	Canis	Canis_spp.	32	0	0	0	0	0	0	0	0	0	0	0	0	0	0	0	0	0	0	0	0	0	0	0	0	0	0	0	0	0	0	0	0	0	0	0	0	0	0	0	0	0	0
[truncated: 134 more columns]
