# Supplementary material for: Advanced airborne eDNA sampling allows robust spatiotemporal characterisation of vertebrate communities
Source: Research Square preprint supplement (doi:10.21203/rs.3.rs-5693469/v1), 2025-02-13
Supplement: Supplementary file 3 [file 611a718bdfacab5f6243e3e5.xlsx]

## Sheet: Meta data
OTU	Sample	Sample type	Taxa
A1_B	A1	Buffer	A1_B
A1_D	A1	Frozen	A1_D
A1_W	A1	LB	A1_W
A10_B	A10	Buffer	A10_B
A10_D	A10	Frozen	A10_D
A10_W	A10	LB	A10_W
A11_B	A11	Buffer	A11_B
A11_D	A11	Frozen	A11_D
A11_W	A11	LB	A11_W
A12_B	A12	Buffer	A12_B
A12_D	A12	Frozen	A12_D
A12_W	A12	LB	A12_W
A13_B	A13	Buffer	A13_B
A13_D	A13	Frozen	A13_D
A13_W	A13	LB	A13_W
A14_B	A14	Buffer	A14_B
A14_D	A14	Frozen	A14_D
A14_W	A14	LB	A14_W
A15_B	A15	Buffer	A15_B
A15_D	A15	Frozen	A15_D
A15_W	A15	LB	A15_W
A16_B	A16	Buffer	A16_B
A16_D	A16	Frozen	A16_D
A16_W	A16	LB	A16_W
A17_B	A17	Buffer	A17_B
A17_D	A17	Frozen	A17_D
A17_W	A17	LB	A17_W
A18_B	A18	Buffer	A18_B
A18_D	A18	Frozen	A18_D
A18_W	A18	LB	A18_W
A19_B	A19	Buffer	A19_B
A19_D	A19	Frozen	A19_D
A19_W	A19	LB	A19_W
A2_B	A2	Buffer	A2_B
A2_D	A2	Frozen	A2_D
A2_W	A2	LB	A2_W
A20_B	A20	Buffer	A20_B
A20_D	A20	Frozen	A20_D
A20_W	A20	LB	A20_W
A3_B	A3	Buffer	A3_B
A3_D	A3	Frozen	A3_D
A3_W	A3	LB	A3_W
A4_B	A4	Buffer	A4_B
A4_D	A4	Frozen	A4_D
A4_W	A4	LB	A4_W
A5_B	A5	Buffer	A5_B
A5_D	A5	Frozen	A5_D
A5_W	A5	LB	A5_W
A6_B	A6	Buffer	A6_B
A6_D	A6	Frozen	A6_D
A6_W	A6	LB	A6_W
A7_B	A7	Buffer	A7_B
A7_D	A7	Frozen	A7_D
A7_W	A7	LB	A7_W
A8_B	A8	Buffer	A8_B
A8_D	A8	Frozen	A8_D
A8_W	A8	LB	A8_W
A9_B	A9	Buffer	A9_B
A9_D	A9	Frozen	A9_D
A9_W	A9	LB	A9_W

## Sheet: BirT OTU Table (exp2)
OTU	Order	Family	Genus	Species	A20_W	A16_B	A14_W	A12_D	A7_D	A9_W	A19_B	A5_W	A6_W	A16_D	A20_D	A4_W	A15_B	A13_W	A18_W	A8_B	A2_W	A14_D	A19_D	A16_W	A4_D	A1_D	A18_D	A13_D	A1_B	A7_W	A12_W	A2_D	A15_D	A1_W	A10_D	A3_W	A11_W	A3_B	A8_W	A8_D	A19_W	A10_W	A14_B	A17_D	A18_B	A17_W	A9_D	A6_D	A3_D
OTU1	Galliformes	Phasianidae	Gallus	Gallus_gallus	60557	58536	47987	46269	40938	31554	28006	25491	23461	23719	20034	21007	18854	19172	18819	16660	17158	17483	16247	16312	16391	15350	13319	14340	14473	13355	13405	13835	13894	12368	12073	11424	11482	11597	10819	10465	14475	9377	7060	8020	9172	6829	6586	6240	5979
OTU10	Pelicaniformes	Ardeidae	Ardea	Ardea_cinerea	0	0	0	1277	0	0	0	2305	0	2825	1542	7814	0	8247	0	0	0	963	4822	0	4930	3144	817	2590	15501	3771	8227	2040	2598	0	0	3877	0	0	0	0	0	0	0	1319	0	0	0	753	1168
OTU12	Anseriformes	Anatidae	Anser	Anser_anser	0	0	3354	0	3066	2259	0	0	0	2707	5786	0	0	0	0	0	10708	5356	2201	0	1642	2016	0	1786	0	0	0	2132	2989	0	2862	0	0	0	0	343	0	0	0	2077	0	0	0	0	3295
OTU13	Passeriformes	Paridae	Parus	Parus_major	0	0	0	2925	902	0	0	5990	5993	797	1585	4074	0	0	3099	0	0	1768	0	0	10602	3703	2274	2441	0	0	0	11566	8756	3516	2699	0	0	0	0	0	0	0	0	2316	0	0	1162	0	607
OTU14	Passeriformes	Fringillidae	Fringilla	Fringilla_coelebs	0	0	0	0	0	0	0	0	0	0	0	0	0	0	0	25115	14455	0	0	3762	0	1548	0	0	0	0	0	0	0	0	0	0	0	0	0	0	0	0	0	0	0	0	0	0	0
OTU15	Accipitriformes	Accipitridae	Buteo	Buteo_buteo	0	0	0	0	1731	0	0	0	0	2834	0	0	0	0	0	0	5387	0	0	3617	0	1139	0	0	0	0	0	2295	8594	0	4518	874	9668	0	14230	0	0	0	0	0	0	0	0	0	3190
OTU16	Passeriformes	Phylloscopidae	Phylloscopus	Phylloscopus_collybita	0	0	0	798	1074	0	0	0	36851	0	0	0	0	0	0	0	0	2356	0	0	0	0	0	0	0	0	0	0	0	0	0	0	0	0	0	0	0	0	0	0	0	0	875	0	0
OTU17	Anseriformes	Anatidae	Anas	Anas_platyrhynchos	0	0	0	0	0	0	0	0	5113	1320	0	10267	0	0	0	0	0	0	0	0	1846	1823	0	2608	0	0	0	1588	0	0	0	0	0	0	0	0	0	0	0	967	0	0	2972	0	0
OTU18	Passeriformes	Emberizidae	Emberiza	Emberiza_schoeniclus	3800	0	0	0	0	0	0	0	0	0	3537	0	0	0	0	0	0	0	585	0	10016	0	0	0	0	0	0	0	4068	0	0	0	0	0	0	7147	0	0	0	0	0	0	0	0	0
OTU19	Passeriformes	Corvidae	Corvus	Corvus_spp.	0	0	0	0	4165	0	0	0	0	6391	1752	0	0	0	0	0	0	0	0	0	1037	0	0	0	0	0	0	1359	871	17015	0	0	0	0	0	1275	0	0	0	0	0	0	0	0	2962
OTU2	Columbiformes	Columbidae	Columba	Columba_palumbus	0	0	0	1816	2716	0	0	0	0	3900	2000	0	0	0	0	0	0	9445	6926	0	0	0	3399	0	0	0	19738	2531	0	13838	861	202624	0	0	0	0	0	0	0	0	0	5379	0	0	0
OTU20	Passeriformes	Muscicapidae	Erithacus	Erithacus_rubecula	0	0	0	0	0	0	0	5134	0	0	0	0	0	0	0	0	6812	973	0	0	1405	2411	0	874	0	0	0	1500	0	0	0	0	0	0	0	0	0	0	0	0	0	0	0	0	2235
OTU21	Anseriformes	Anatidae	Anser	Anser_anser	0	0	0	0	0	0	0	0	0	0	1033	0	0	0	0	0	0	0	0	0	774	0	0	0	0	0	0	0	0	0	0	0	0	0	0	0	0	0	0	0	0	17060	0	0	0
OTU22	Columbiformes	Columbidae	Columba	Columba_oenas	4476	0	0	0	0	0	0	0	0	0	12476	0	0	0	0	0	0	0	0	0	0	1607	0	0	0	0	0	0	0	0	0	0	0	0	6711	0	0	0	0	0	0	0	0	0	0
OTU23	Passeriformes	Sylviidae	Sylvia	Sylvia_atricapilla	0	0	0	0	0	0	0	11116	0	0	0	0	0	0	0	0	2010	0	0	0	0	2414	0	0	0	0	0	0	2967	0	0	0	0	0	0	0	0	0	0	0	0	0	0	0	0
OTU24	Charadriiformes	Laridae	Chroicocephalus	Chroicocephalus_ridibundus	0	0	7732	0	1144	0	0	0	0	0	0	4442	0	0	0	0	0	447	0	3387	1093	0	0	0	0	0	0	2128	0	0	0	1591	0	0	0	1796	0	0	0	0	0	0	0	0	1752
OTU26	Passeriformes	Sylviidae	Sylvia	Sylvia_borin	0	0	0	0	0	0	0	0	0	0	0	0	0	0	0	0	0	0	0	0	0	0	0	0	0	0	0	13575	0	0	0	0	0	0	0	0	0	0	0	0	0	0	0	0	0
OTU27	Charadriiformes	Charadriidae	Pluvialis	Pluvialis_apricaria	0	0	0	0	0	0	0	0	0	0	0	0	0	0	0	0	0	550	0	0	0	0	0	0	0	9995	0	0	0	0	0	0	0	0	0	0	0	0	0	0	0	0	0	1827	0
OTU28	Strigiformes	Strigidae	Asio	Asio_otus	0	0	0	0	0	0	0	0	0	0	0	0	0	0	0	0	0	0	110	0	0	1509	0	0	0	0	0	0	0	10838	0	0	0	0	0	0	0	0	0	0	0	0	0	0	0
OTU29	Passeriformes	Passeridae	Passer	Passer_montanus	0	0	0	0	0	0	0	0	0	0	635	0	0	0	0	0	0	0	0	0	1766	0	1450	0	0	0	0	0	0	0	930	0	0	0	0	2668	0	0	0	0	0	0	0	1804	0
OTU3	Passeriformes	Oreoicidae	Aleadryas	Aleadryas_rufinucha	0	0	0	0	0	0	0	0	0	0	0	0	0	0	0	0	0	0	0	0	0	0	0	0	0	0	0	0	0	0	0	0	0	0	0	0	0	0	0	0	0	0	0	0	0
OTU30	Columbiformes	Columbidae	N/A	N/A	0	0	0	0	0	0	0	0	0	0	0	0	0	0	0	0	0	29893	0	0	0	0	0	0	0	0	0	0	0	3284	0	0	0	0	0	0	0	0	0	0	0	0	0	0	0
OTU31	Galliformes	Phasianidae	Meleagris	Meleagris_gallopavo	0	0	0	0	0	0	0	0	0	0	0	0	0	0	0	0	0	0	0	0	0	0	0	0	0	0	0	0	0	0	2495	0	0	0	0	0	0	0	0	6995	0	0	0	0	0
OTU33	Accipitriformes	Accipitridae	Haliaeetus	Haliaeetus_albicilla	0	0	0	0	0	0	0	0	0	0	0	0	0	0	0	0	0	0	894	0	0	0	2615	0	0	0	0	0	2649	0	0	0	0	0	0	0	0	0	0	2366	0	0	0	0	0
OTU34	Passeriformes	Prunellidae	Prunella	Prunella_modularis	0	0	0	0	0	0	0	0	0	0	0	0	0	0	0	0	0	0	0	0	0	0	0	0	0	0	0	0	0	0	0	6729	0	0	0	0	0	0	0	0	0	0	0	0	0
OTU35	Gruiformes	Ralidae	Rallus	Rallus spp.	0	0	0	0	0	0	0	0	0	0	0	0	0	0	0	0	0	0	0	0	0	0	0	0	0	0	0	0	0	5670	0	0	0	0	0	0	0	0	0	0	0	0	0	0	613
OTU37	Passeriformes	Sylviidae	Sylvia	Sylvia_spp.	0	0	0	0	0	0	0	0	0	0	0	0	0	0	0	0	0	0	0	0	0	0	0	0	0	0	0	0	0	0	1140	3561	0	0	0	0	0	0	0	0	0	0	0	0	1334
OTU39	Passeriformes	Fringillidae	N/A	N/A	2277	0	0	0	0	0	0	0	0	0	0	0	0	0	0	0	0	240	0	0	0	0	0	0	0	0	0	0	2824	0	0	0	0	0	0	0	0	0	0	0	0	0	0	0	0
OTU4	Suliformes	Phalacrocoracidae	Phalacrocorax	Phalacrocorax_carbo	0	0	0	0	1542	0	0	8256	4291	1781	3155	16404	0	0	2307	0	10435	498	608	3428	12185	9387	0	0	26280	5680	0	13939	935	12139	0	7658	0	0	0	0	0	0	0	0	0	0	6069	0	4438
OTU42	Passeriformes	Sturnidae	Sturnus	Sturnus_vulgaris	0	0	0	0	0	0	0	0	0	1166	0	0	0	0	0	0	0	0	0	0	0	0	0	0	0	0	0	0	0	0	0	1483	0	0	0	0	0	0	0	0	0	0	0	0	0
OTU43	Passeriformes	Hirundinidae	Hirundo	Hirundo_rustica	0	0	0	0	0	0	0	0	0	0	0	0	0	0	0	0	0	0	0	0	1469	2812	0	0	0	0	0	0	0	0	0	0	0	0	0	0	0	0	0	0	0	0	0	0	0
OTU44	Passeriformes	Certhidae	Certhia	Certhia_brachydactyla	0	0	0	0	0	0	0	0	0	0	0	0	0	0	0	0	0	0	2290	0	0	0	0	0	0	0	0	0	0	0	0	0	0	0	0	0	0	0	0	0	0	0	0	0	0
OTU46	Passeriformes	Muscicapidae	Muscicapa	Muscicapa_striata	0	0	0	0	0	0	0	0	0	0	0	0	0	0	0	0	0	0	0	0	0	0	0	2319	0	0	0	0	0	0	0	0	0	0	0	0	0	0	0	0	0	0	0	0	0
OTU48	Passeriformes	Corvidae	Garrulus	Garrulus_glandarius	0	0	0	0	0	0	0	0	0	0	0	0	0	0	0	0	0	0	0	0	0	1299	0	0	0	0	0	0	0	0	0	0	0	0	0	0	0	0	0	0	0	0	0	0	0
OTU5	Passeriformes	Corvidae	Pica	Pica_pica	0	0	0	0	507	0	0	0	0	0	0	112028	0	0	0	0	0	0	0	0	0	0	0	0	0	0	0	0	0	0	0	0	0	0	0	0	0	0	0	0	0	0	0	0	0
OTU51	Psittaciformes	Psittaculidae	Psittacula	Psittacula_krameri	0	0	0	0	0	0	0	0	0	0	0	0	0	0	0	0	0	925	0	0	0	0	0	0	0	0	0	0	0	0	0	0	0	0	0	0	0	0	0	0	0	0	0	0	0
OTU52	Passeriformes	Fringillidae	Chloris	Chloris_chloris	0	0	0	0	0	0	0	0	0	0	0	0	0	0	0	0	0	421	0	0	0	0	0	0	0	0	0	0	0	0	0	0	0	0	0	0	0	0	0	0	0	0	0	0	0
OTU58	Columbiformes	Columbidae	N/A	N/A	0	0	0	0	0	0	0	0	0	0	0	0	0	0	0	0	0	227	0	0	0	0	0	0	0	0	0	0	0	0	0	0	0	0	0	0	0	0	0	0	0	0	0	0	0
OTU6	Passeriformes	Turdidae	Turdus	Turdus_merula	0	0	0	6666	2597	5095	5954	9724	0	1967	2393	3477	0	0	0	13319	0	2631	5492	0	18719	1879	0	2730	0	0	4573	4952	0	7288	2960	0	7873	0	0	6019	2999	0	0	0	0	0	2353	0	0
OTU60	Galliformes	Phasianidae	Gallus	Gallus_gallus	0	0	0	0	0	0	0	0	0	0	0	0	0	0	0	0	0	0	0	0	0	0	0	0	0	0	0	0	0	0	0	29	0	0	0	0	0	0	0	0	0	0	0	0	0
OTU62	Passeriformes	Prunellidae	Prunella	Prunella_spp.	0	0	0	0	0	0	0	0	0	0	0	0	0	0	0	0	0	0	0	0	0	0	0	0	0	0	0	0	0	0	0	21	0	0	0	0	0	0	0	0	0	0	0	0	0
OTU7	Passeriformes	Troglodytidae	Troglodytes	Troglodytes troglodytes	0	0	0	4262	4728	0	9061	0	0	3754	0	0	0	4320	3689	0	10491	4690	3149	0	4729	3537	0	2552	0	17270	0	3572	7425	0	0	0	7485	0	0	0	21029	0	0	0	0	0	1408	0	0
OTU8	Galliformes	Phasianidae	Phasianus	Phasianus_colchicus	0	0	3533	2244	2579	0	0	0	0	1776	3680	1531	0	0	0	18648	0	1459	0	0	8031	3383	6424	2131	0	0	5998	3036	2786	6081	2598	0	0	0	7982	3953	0	0	0	0	0	0	1221	0	0
OTU9	Anseriformes	Anatidae	Somateria	Somateria_mollissima	0	0	2647	3111	2528	0	0	0	0	2196	1666	5881	0	4149	0	0	3288	1407	2236	0	1488	4072	0	788	0	0	2797	3714	3967	0	1464	5006	0	0	0	2457	0	0	0	2811	0	0	6866	4098	1186
[truncated: 10 more columns]

## Sheet: BirT Taxa table (exp2)
OTU	Taxa	Order	Family	Genus	Species	Sum	A20_W	A16_B	A14_W	A12_D	A7_D	A9_W	A19_B	A5_W	A6_W	A16_D	A20_D	A4_W	A15_B	A13_W	A18_W	A8_B	A2_W	A14_D	A19_D	A16_W	A4_D	A1_D	A18_D	A13_D	A1_B	A7_W	A12_W	A2_D	A15_D	A1_W	A10_D	A3_W	A11_W	A3_B	A8_W	A8_D	A19_W	A10_W	A14_B	A17_D	A18_B	A17_W	A9_D
OTU1_60	Taxa1	Galliformes	Phasianidae	Gallus	Gallus_gallus	867704	60557	58536	47987	46269	40938	31554	28006	25491	23461	23719	20034	21007	18854	19172	18819	16660	17158	17483	16247	16312	16391	15350	13319	14340	14473	13355	13405	13835	13894	12368	12073	11453	11482	11597	10819	10465	14475	9377	7060	8020	9172	6829	6586
OTU2	Taxa2	Columbiformes	Columbidae	Columba	Columba_palumbus	275173	0	0	0	1816	2716	0	0	0	0	3900	2000	0	0	0	0	0	0	9445	6926	0	0	0	3399	0	0	0	19738	2531	0	13838	861	202624	0	0	0	0	0	0	0	0	0	5379	0
OTU3	Taxa3	Passeriformes	Oreoicidae	Aleadryas	Aleadryas_rufinucha	203624	0	0	0	0	0	0	0	0	0	0	0	0	0	0	0	0	0	0	0	0	0	0	0	0	0	0	0	0	0	0	0	0	0	0	0	0	0	0	0	0	0	0	0
OTU4	Taxa4	Suliformes	Phalacrocoracidae	Phalacrocorax	Phalacrocorax_carbo	174574	0	0	0	0	1542	0	0	8256	4291	1781	3155	16404	0	0	2307	0	10435	498	608	3428	12185	9387	0	0	26280	5680	0	13939	935	12139	0	7658	0	0	0	0	0	0	0	0	0	0	6069
OTU5	Taxa5	Passeriformes	Corvidae	Pica	Pica_pica	168014	0	0	0	0	507	0	0	0	0	0	0	112028	0	0	0	0	0	0	0	0	0	0	0	0	0	0	0	0	0	0	0	0	0	0	0	0	0	0	0	0	0	0	0
OTU6	Taxa6	Passeriformes	Turdidae	Turdus	Turdus_merula	144094	0	0	0	6666	2597	5095	5954	9724	0	1967	2393	3477	0	0	0	13319	0	2631	5492	0	18719	1879	0	2730	0	0	4573	4952	0	7288	2960	0	7873	0	0	6019	2999	0	0	0	0	0	2353
OTU8	Taxa7	Galliformes	Phasianidae	Phasianus	Phasianus_colchicus	134686	0	0	3533	2244	2579	0	0	0	0	1776	3680	1531	0	0	0	18648	0	1459	0	0	8031	3383	6424	2131	0	0	5998	3036	2786	6081	2598	0	0	0	7982	3953	0	0	0	0	0	0	1221
OTU7	Taxa8	Passeriformes	Troglodytidae	Troglodytes	Troglodytes troglodytes	133654	0	0	0	4262	4728	0	9061	0	0	3754	0	0	0	4320	3689	0	10491	4690	3149	0	4729	3537	0	2552	0	17270	0	3572	7425	0	0	0	7485	0	0	0	21029	0	0	0	0	0	1408
OTU9	Taxa9	Anseriformes	Anatidae	Somateria	Somateria_mollissima	90687	0	0	2647	3111	2528	0	0	0	0	2196	1666	5881	0	4149	0	0	3288	1407	2236	0	1488	4072	0	788	0	0	2797	3714	3967	0	1464	5006	0	0	0	2457	0	0	0	2811	0	0	6866
OTU10	Taxa10	Pelicaniformes	Ardeidae	Ardea	Ardea_cinerea	89622	0	0	0	1277	0	0	0	2305	0	2825	1542	7814	0	8247	0	0	0	963	4822	0	4930	3144	817	2590	15501	3771	8227	2040	2598	0	0	3877	0	0	0	0	0	0	0	1319	0	0	0
OTU12_21	Taxa11	Anseriformes	Anatidae	Anser	Anser_anser	82731	0	0	3354	0	3066	2259	0	0	0	2707	6819	0	0	0	0	0	10708	5356	2201	0	2416	2016	0	1786	0	0	0	2132	2989	0	2862	0	0	0	0	343	0	0	0	2077	0	17060	0
OTU13	Taxa12	Passeriformes	Paridae	Parus	Parus_major	76775	0	0	0	2925	902	0	0	5990	5993	797	1585	4074	0	0	3099	0	0	1768	0	0	10602	3703	2274	2441	0	0	0	11566	8756	3516	2699	0	0	0	0	0	0	0	0	2316	0	0	1162
OTU15	Taxa13	Accipitriformes	Accipitridae	Buteo	Buteo_buteo	63090	0	0	0	0	1731	0	0	0	0	2834	0	0	0	0	0	0	5387	0	0	3617	0	1139	0	0	0	0	0	2295	8594	0	4518	874	9668	0	14230	0	0	0	0	0	0	0	0
OTU14	Taxa14	Passeriformes	Fringillidae	Fringilla	Fringilla_coelebs	45621	0	0	0	0	0	0	0	0	0	0	0	0	0	0	0	25115	14455	0	0	3762	0	1548	0	0	0	0	0	0	0	0	0	0	0	0	0	0	0	0	0	0	0	0	0
OTU16	Taxa15	Passeriformes	Phylloscopidae	Phylloscopus	Phylloscopus_collybita	41954	0	0	0	798	1074	0	0	0	36851	0	0	0	0	0	0	0	0	2356	0	0	0	0	0	0	0	0	0	0	0	0	0	0	0	0	0	0	0	0	0	0	0	0	875
OTU19	Taxa16	Passeriformes	Corvidae	Corvus	Corvus_spp.	36827	0	0	0	0	4165	0	0	0	0	6391	1752	0	0	0	0	0	0	0	0	0	1037	0	0	0	0	0	0	1359	871	17015	0	0	0	0	0	1275	0	0	0	0	0	0	0
OTU18	Taxa17	Passeriformes	Emberizidae	Emberiza	Emberiza_schoeniclus	34405	3800	0	0	0	0	0	0	0	0	0	3537	0	0	0	0	0	0	0	585	0	10016	0	0	0	0	0	0	0	4068	0	0	0	0	0	0	7147	0	0	0	0	0	0	0
OTU30	Taxa18	Columbiformes	Columbidae	N/A	N/A	33177	0	0	0	0	0	0	0	0	0	0	0	0	0	0	0	0	0	29893	0	0	0	0	0	0	0	0	0	0	0	3284	0	0	0	0	0	0	0	0	0	0	0	0	0
OTU24	Taxa19	Charadriiformes	Laridae	Chroicocephalus	Chroicocephalus_ridibundus	30656	0	0	7732	0	1144	0	0	0	0	0	0	4442	0	0	0	0	0	447	0	3387	1093	0	0	0	0	0	0	2128	0	0	0	1591	0	0	0	1796	0	0	0	0	0	0	0
OTU17	Taxa20	Anseriformes	Anatidae	Anas	Anas_platyrhynchos	28504	0	0	0	0	0	0	0	0	5113	1320	0	10267	0	0	0	0	0	0	0	0	1846	1823	0	2608	0	0	0	1588	0	0	0	0	0	0	0	0	0	0	0	967	0	0	2972
OTU22	Taxa21	Columbiformes	Columbidae	Columba	Columba_oenas	25817	4476	0	0	0	0	0	0	0	0	0	12476	0	0	0	0	0	0	0	0	0	0	1607	0	0	0	0	0	0	0	0	0	0	0	0	6711	0	0	0	0	0	0	0	0
OTU20	Taxa22	Passeriformes	Muscicapidae	Erithacus	Erithacus_rubecula	21344	0	0	0	0	0	0	0	5134	0	0	0	0	0	0	0	0	6812	973	0	0	1405	2411	0	874	0	0	0	1500	0	0	0	0	0	0	0	0	0	0	0	0	0	0	0
OTU23	Taxa23	Passeriformes	Sylviidae	Sylvia	Sylvia_atricapilla	18507	0	0	0	0	0	0	0	11116	0	0	0	0	0	0	0	0	2010	0	0	0	0	2414	0	0	0	0	0	0	2967	0	0	0	0	0	0	0	0	0	0	0	0	0	0
OTU29	Taxa24	Passeriformes	Passeridae	Passer	Passer_montanus	17964	0	0	0	0	0	0	0	0	0	0	635	0	0	0	0	0	0	0	0	0	1766	0	1450	0	0	0	0	0	0	0	930	0	0	0	0	2668	0	0	0	0	0	0	0
OTU26	Taxa25	Passeriformes	Sylviidae	Sylvia	Sylvia_borin	13575	0	0	0	0	0	0	0	0	0	0	0	0	0	0	0	0	0	0	0	0	0	0	0	0	0	0	0	13575	0	0	0	0	0	0	0	0	0	0	0	0	0	0	0
OTU28	Taxa26	Strigiformes	Strigidae	Asio	Asio_otus	12457	0	0	0	0	0	0	0	0	0	0	0	0	0	0	0	0	0	0	110	0	0	1509	0	0	0	0	0	0	0	10838	0	0	0	0	0	0	0	0	0	0	0	0	0
OTU27	Taxa27	Charadriiformes	Charadriidae	Pluvialis	Pluvialis_apricaria	12372	0	0	0	0	0	0	0	0	0	0	0	0	0	0	0	0	0	550	0	0	0	0	0	0	0	9995	0	0	0	0	0	0	0	0	0	0	0	0	0	0	0	0	0
OTU31	Taxa28	Galliformes	Phasianidae	Meleagris	Meleagris_gallopavo	9490	0	0	0	0	0	0	0	0	0	0	0	0	0	0	0	0	0	0	0	0	0	0	0	0	0	0	0	0	0	0	2495	0	0	0	0	0	0	0	0	6995	0	0	0
OTU33	Taxa29	Accipitriformes	Accipitridae	Haliaeetus	Haliaeetus_albicilla	8524	0	0	0	0	0	0	0	0	0	0	0	0	0	0	0	0	0	0	894	0	0	0	2615	0	0	0	0	0	2649	0	0	0	0	0	0	0	0	0	0	2366	0	0	0
OTU34	Taxa30	Passeriformes	Prunellidae	Prunella	Prunella_modularis	6729	0	0	0	0	0	0	0	0	0	0	0	0	0	0	0	0	0	0	0	0	0	0	0	0	0	0	0	0	0	0	0	6729	0	0	0	0	0	0	0	0	0	0	0
OTU35	Taxa31	Gruiformes	Ralidae	Rallus	Rallus spp.	6283	0	0	0	0	0	0	0	0	0	0	0	0	0	0	0	0	0	0	0	0	0	0	0	0	0	0	0	0	0	5670	0	0	0	0	0	0	0	0	0	0	0	0	0
OTU37	Taxa32	Passeriformes	Sylviidae	Sylvia	Sylvia_spp.	6035	0	0	0	0	0	0	0	0	0	0	0	0	0	0	0	0	0	0	0	0	0	0	0	0	0	0	0	0	0	0	1140	3561	0	0	0	0	0	0	0	0	0	0	0
OTU39	Taxa33	Passeriformes	Fringillidae	N/A	N/A	5341	2277	0	0	0	0	0	0	0	0	0	0	0	0	0	0	0	0	240	0	0	0	0	0	0	0	0	0	0	2824	0	0	0	0	0	0	0	0	0	0	0	0	0	0
OTU43	Taxa34	Passeriformes	Hirundinidae	Hirundo	Hirundo_rustica	4281	0	0	0	0	0	0	0	0	0	0	0	0	0	0	0	0	0	0	0	0	1469	2812	0	0	0	0	0	0	0	0	0	0	0	0	0	0	0	0	0	0	0	0	0
OTU42	Taxa35	Passeriformes	Sturnidae	Sturnus	Sturnus_vulgaris	2649	0	0	0	0	0	0	0	0	0	1166	0	0	0	0	0	0	0	0	0	0	0	0	0	0	0	0	0	0	0	0	0	1483	0	0	0	0	0	0	0	0	0	0	0
OTU46	Taxa36	Passeriformes	Muscicapidae	Muscicapa	Muscicapa_striata	2319	0	0	0	0	0	0	0	0	0	0	0	0	0	0	0	0	0	0	0	0	0	0	0	2319	0	0	0	0	0	0	0	0	0	0	0	0	0	0	0	0	0	0	0
OTU44	Taxa37	Passeriformes	Certhidae	Certhia	Certhia_brachydactyla	2290	0	0	0	0	0	0	0	0	0	0	0	0	0	0	0	0	0	0	2290	0	0	0	0	0	0	0	0	0	0	0	0	0	0	0	0	0	0	0	0	0	0	0	0
OTU48	Taxa38	Passeriformes	Corvidae	Garrulus	Garrulus_glandarius	1299	0	0	0	0	0	0	0	0	0	0	0	0	0	0	0	0	0	0	0	0	0	1299	0	0	0	0	0	0	0	0	0	0	0	0	0	0	0	0	0	0	0	0	0
OTU51	Taxa39	Psittaciformes	Psittaculidae	Psittacula	Psittacula_krameri	925	0	0	0	0	0	0	0	0	0	0	0	0	0	0	0	0	0	925	0	0	0	0	0	0	0	0	0	0	0	0	0	0	0	0	0	0	0	0	0	0	0	0	0
OTU52	Taxa40	Passeriformes	Fringillidae	Chloris	Chloris_chloris	421	0	0	0	0	0	0	0	0	0	0	0	0	0	0	0	0	0	421	0	0	0	0	0	0	0	0	0	0	0	0	0	0	0	0	0	0	0	0	0	0	0	0	0
OTU58	Taxa41	Columbiformes	Columbidae	N/A	N/A	227	0	0	0	0	0	0	0	0	0	0	0	0	0	0	0	0	0	227	0	0	0	0	0	0	0	0	0	0	0	0	0	0	0	0	0	0	0	0	0	0	0	0	0
OTU62	Taxa42	Passeriformes	Prunellidae	Prunella	Prunella_spp.	21	0	0	0	0	0	0	0	0	0	0	0	0	0	0	0	0	0	0	0	0	0	0	0	0	0	0	0	0	0	0	0	21	0	0	0	0	0	0	0	0	0	0	0
[truncated: 11 more columns]

## Sheet: 16Smam OTU table (exp2)
OTU	Class	Order	Family	Genus	Species	Sum	A9_D	A5_D	A5_W	A2_W	A8_D	A19_W	A1_W	A9_W	A2_D	A7_D	A14_D	A20_D	A6_W	A7_W	A1_D	A16_D	A13_D	A12_W	A3_D	A4_D	A3_W	A17_D	A6_D	A15_D	A12_D	A19_D	A18_W	A14_W	A20_W	A11_D	A10_W	A18_D	A17_W	A11_W	A8_W	A10_D	A13_W	A3_B	A6_B	A4_W	A16_W	A1_B	A15_W
OTU1	Mammalia	Artiodactyla	Suidae	Sus	Sus_scrofa	3621605	150374	129190	127285	126668	120658	121620	112324	101087	100777	97677	89257	86665	95727	93310	90614	88021	84446	76981	78950	80847	76549	73700	74081	70335	71140	62518	62250	60901	53711	53529	44820	43328	45615	42561	46001	42207	40511	41175	38955	36637	36034	40575	36480
OTU5	Mammalia	Carnivora	Canidae	Canis	Canis_lupus	454337	0	7045	11388	17767	37831	8650	0	6547	6961	0	16195	3798	0	3687	3376	0	10003	4860	13346	9418	21162	14340	8883	4723	8872	6368	0	0	11996	7320	42127	7240	4345	14236	9947	15579	36828	0	0	4991	4818	0	4106
OTU4	Mammalia	Rodentia	Muridae	Mus	Mus_musculus	291358	0	0	7287	14781	0	15360	12890	14003	0	0	0	0	8154	12206	0	0	0	9496	0	0	12496	0	0	0	0	0	14089	8022	15559	0	18676	0	20517	17039	15275	0	13351	0	0	1123	12577	5864	9892
OTU9	Mammalia	Artiodactyla	Bovidae	Bos	Bos_indicus	216277	19822	25555	0	7962	1569	13483	6825	5851	1499	0	4016	0	2818	0	3499	3212	9028	10960	4575	9408	2183	2136	3620	7366	3536	3895	12452	0	3477	7555	6741	11038	0	7236	0	9789	0	0	0	1316	0	0	0
OTU7	Mammalia	Rodentia	Muridae	Mus	Mus_musculus	163988	0	0	3876	7607	0	7897	6880	7566	0	0	0	0	4842	6371	0	0	0	4717	0	0	7082	0	0	0	0	0	7567	4381	6308	0	9536	0	10923	8809	9965	0	8374	0	0	664	5170	5373	5887
OTU11	Mammalia	Rodentia	Cricetidae	Microtus	Microtus_agrestis	114424	0	4668	0	10468	0	15103	0	0	10285	0	0	0	0	0	1652	10034	5754	0	0	0	0	10904	0	6453	13551	5481	0	0	0	0	0	0	0	0	0	0	0	0	0	0	0	0	14218
OTU12	Mammalia	Artiodactyla	Bovidae	Ovis	Ovis_spp.	93109	1571	0	0	3368	0	0	0	0	0	0	0	0	0	0	0	0	0	0	0	11306	0	0	0	0	0	0	0	72691	0	4173	0	0	0	0	0	0	0	0	0	0	0	0	0
OTU13	Mammalia	Primates	Hominidae	Homo	Homo_sapiens	77116	0	0	0	0	0	0	0	0	0	0	1987	0	0	0	0	0	0	0	0	0	0	0	0	0	0	0	0	0	0	5797	0	0	0	2922	0	1003	0	0	0	40079	0	0	0
OTU15	Amphibian	Anura	Bufonidae	Bufo	Bufo_bufo	53100	0	1361	13226	0	0	5342	0	0	1229	1083	4628	2686	0	0	2062	924	0	0	0	2952	0	0	0	8781	1691	3982	0	0	0	0	0	900	0	0	0	0	0	0	0	0	0	0	0
OTU23	Mammalia	Primates	Hominidae	Pan	Pan_troglodytes	43476	0	0	0	0	0	0	0	0	0	0	805	0	0	0	0	0	0	0	0	0	0	0	0	0	0	0	0	0	0	2361	0	0	0	0	0	0	0	0	0	25066	0	0	0
OTU17	Mammalia	Rodentia	Cricetidae	Myodes	Myodes_glareolus	35696	0	0	0	11005	0	0	0	0	0	0	0	0	0	0	1852	0	0	0	5830	0	0	0	0	0	0	0	0	0	17009	0	0	0	0	0	0	0	0	0	0	0	0	0	0
OTU19	Mammalia	Eulipotyphla	Erinaceidae	Erinaceus	Erinaceus_europaeus	32037	0	0	0	13314	0	0	0	0	0	0	0	0	13626	5097	0	0	0	0	0	0	0	0	0	0	0	0	0	0	0	0	0	0	0	0	0	0	0	0	0	0	0	0	0
OTU21	Mammalia	Primates	Hominidae	Homo	Homo_sapiens	27693	0	0	0	0	0	0	0	0	0	0	418	0	0	0	0	0	0	0	0	0	0	0	0	0	0	0	0	0	0	889	0	0	1817	3208	0	0	0	0	0	12999	0	0	0
OTU22	Mammalia	Primates	Hominidae	Homo	Homo_sapiens	22405	0	0	0	0	0	0	0	0	0	0	272	0	0	0	0	0	0	0	0	0	0	0	0	0	0	0	0	0	0	2100	0	0	0	0	0	0	0	0	0	9884	0	0	0
OTU27	Mammalia	Perissodactyla	Equidae	Equus	Equus_caballus	13460	3430	0	0	0	0	0	0	0	0	0	5745	2053	0	0	972	0	0	0	0	1260	0	0	0	0	0	0	0	0	0	0	0	0	0	0	0	0	0	0	0	0	0	0	0
OTU30	Mammalia	Chiroptera	Vespertilionidae	Pipistrellus	Pipistrellus_pygmaeus	12428	0	0	0	0	0	0	0	0	0	11152	0	0	0	0	0	0	0	0	0	1276	0	0	0	0	0	0	0	0	0	0	0	0	0	0	0	0	0	0	0	0	0	0	0
OTU31	Mammalia	Artiodactyla	Suidae	Sus	Sus_scrofa	10953	1705	0	0	0	537	0	0	0	0	1539	1451	2725	0	0	713	683	0	0	0	0	0	0	0	698	902	0	0	0	0	0	0	0	0	0	0	0	0	0	0	0	0	0	0
OTU33	Mammalia	Primates	Hominidae	Homo	Homo_sapiens	7943	0	0	0	0	0	0	0	0	0	0	0	0	0	0	0	0	0	0	0	0	0	0	0	0	0	0	0	0	0	870	0	0	0	0	0	0	0	0	0	4732	0	0	0
OTU32	Mammalia	Artiodactyla	Bovidae	Capra	Capra_hircus	7636	0	0	0	0	7636	0	0	0	0	0	0	0	0	0	0	0	0	0	0	0	0	0	0	0	0	0	0	0	0	0	0	0	0	0	0	0	0	0	0	0	0	0	0
OTU38	Mammalia	Primates	Hominidae	Homo	Homo_sapiens	4669	0	0	0	322	0	0	0	0	0	0	0	0	0	0	0	0	0	0	0	0	0	0	0	0	0	0	0	0	0	0	0	0	0	0	0	0	0	0	0	2654	0	0	0
OTU37	Mammalia	Carnivora	Felidae	Felis	Felis_silvestris	4394	0	0	0	0	0	0	0	0	0	0	0	0	0	0	0	0	0	0	0	0	0	0	0	0	0	0	0	0	0	0	0	0	0	0	0	0	0	0	0	4394	0	0	0
OTU42	Mammalia	Carnivora	Canidae	Vulpes	Vulpes_vulpes	3607	0	0	0	0	0	0	0	0	0	0	0	0	0	0	0	0	3607	0	0	0	0	0	0	0	0	0	0	0	0	0	0	0	0	0	0	0	0	0	0	0	0	0	0
OTU43	Mammalia	Chiroptera	Vespertilionidae	Eptesicus	Eptesicus_spp.	3261	0	3261	0	0	0	0	0	0	0	0	0	0	0	0	0	0	0	0	0	0	0	0	0	0	0	0	0	0	0	0	0	0	0	0	0	0	0	0	0	0	0	0	0
OTU45	Mammalia	Lagomorpha	Leporidae	Lepus	Lepus_europaeus	3075	0	0	0	0	0	0	0	0	0	0	0	0	0	0	0	0	0	0	0	0	0	0	3075	0	0	0	0	0	0	0	0	0	0	0	0	0	0	0	0	0	0	0	0
OTU44	Mammalia	Rodentia	Sciuridae	Sciurus	Sciurus_spp.	2840	0	0	0	0	0	0	0	0	0	629	0	2211	0	0	0	0	0	0	0	0	0	0	0	0	0	0	0	0	0	0	0	0	0	0	0	0	0	0	0	0	0	0	0
OTU46	Mammalia	Primates	Hominidae	Homo	Homo_sapiens	2789	0	0	0	0	0	0	0	0	0	0	0	0	0	0	0	0	0	0	0	0	0	0	0	0	0	0	0	0	0	163	0	0	0	0	0	0	0	0	0	1647	0	0	0
OTU47	Mammalia	Artiodactyla	Suidae	Sus	Sus_scrofa	2589	410	186	0	0	362	0	0	0	0	542	0	90	334	0	257	0	354	0	0	0	0	0	0	0	0	54	0	0	0	0	0	0	0	0	0	0	0	0	0	0	0	0	0
OTU54	Mammalia	Primates	Hominidae	Homo	Homo_sapiens	1776	0	0	0	0	0	0	0	0	0	0	834	0	0	0	0	0	0	0	0	0	0	0	0	0	0	0	0	0	0	0	0	0	0	139	0	0	0	0	0	574	0	0	0
OTU57	Mammalia	Rodentia	Muridae	Rattus	Rattus_norvegicus	1536	0	0	0	0	0	0	0	0	0	0	0	0	0	0	0	0	0	0	0	0	0	0	0	0	1536	0	0	0	0	0	0	0	0	0	0	0	0	0	0	0	0	0	0
OTU61	Mammalia	Artiodactyla	Cervidae	Dama	Dama_dama	1452	0	0	0	0	0	0	0	1068	0	0	0	0	0	0	0	0	0	0	0	0	0	0	0	0	0	45	0	0	0	0	0	0	0	0	127	0	0	0	0	0	0	0	0
OTU62	Mammalia	Rodentia	Muridae	Apodemus	Apodemus_flavicollis	1424	0	0	0	0	0	0	0	0	0	0	0	0	0	0	0	0	0	0	0	0	0	0	1424	0	0	0	0	0	0	0	0	0	0	0	0	0	0	0	0	0	0	0	0
OTU79	Aves	Passeriformes	Corvidae	Pica	Pica_pica	1133	0	0	0	0	0	0	0	0	0	0	0	77	0	0	0	326	0	0	0	0	0	0	0	56	0	0	0	0	0	0	0	0	0	0	0	0	0	0	0	388	0	0	0
OTU93	Mammalia	Primates	Hominidae	Homo	Homo_sapiens	264	0	0	0	0	0	0	0	0	0	0	0	0	0	0	0	0	0	0	0	0	0	0	0	0	0	0	0	0	0	0	0	0	0	0	0	0	0	0	0	264	0	0	0
OTU87	Mammalia	Primates	Hominidae	Homo	Homo_sapiens	224	0	0	0	0	0	0	0	0	0	0	0	0	0	0	0	0	0	0	0	0	0	0	0	0	0	0	0	0	0	0	0	0	0	0	0	0	0	0	0	224	0	0	0
OTU90	Mammalia	Primates	Hominidae	Homo	Homo_sapiens	202	0	0	0	0	0	0	0	0	0	0	0	0	0	0	0	0	0	0	0	0	0	0	0	0	0	0	0	0	0	0	0	0	0	0	0	0	0	0	0	131	0	0	0
OTU100	Mammalia	Primates	Hominidae	Homo	Homo_sapiens	171	0	0	0	0	0	0	0	0	0	0	0	0	0	0	0	0	0	0	0	0	0	0	0	0	0	0	0	0	0	0	0	0	0	0	0	0	0	0	0	69	0	0	0
OTU118	Aves	Galliforme	Phasianidae	Gallus	Gallus_gallus	113	0	0	0	0	0	0	0	0	0	0	0	0	0	0	0	0	0	0	0	0	0	0	0	0	0	0	0	0	0	113	0	0	0	0	0	0	0	0	0	0	0	0	0
OTU140	Mammalia	Primates	Hominidae	Homo	Homo_sapiens	36	0	0	0	0	0	0	0	0	0	0	0	0	0	0	0	0	0	0	0	0	0	0	0	0	0	0	0	0	0	0	0	0	0	0	0	0	0	0	0	36	0	0	0
[truncated: 18 more columns]

## Sheet: 16Smam Taxa table (exp2)
OTU	Taxa	Class	Order	Family	Genus	Species	Sum	A9_D	A5_D	A5_W	A2_W	A8_D	A19_W	A1_W	A9_W	A2_D	A7_D	A14_D	A20_D	A6_W	A7_W	A1_D	A16_D	A13_D	A12_W	A3_D	A4_D	A3_W	A17_D	A6_D	A15_D	A12_D	A19_D	A18_W	A14_W	A20_W	A11_D	A10_W	A18_D	A17_W	A11_W	A8_W	A10_D	A13_W	A3_B	A6_B	A4_W	A16_W	A1_B
OTU1_31_47	Taxa1	Mammalia	Artiodactyla	Suidae	Sus	Sus_scrofa	3635147	152489	129376	127285	126668	121557	121620	112324	101087	100777	99758	90708	89480	96061	93310	91584	88704	84800	76981	78950	80847	76549	73700	74081	71033	72042	62572	62250	60901	53711	53529	44820	43328	45615	42561	46001	42207	40511	41175	38955	36637	36034	40575
OTU4_7	Taxa3	Mammalia	Rodentia	Muridae	Mus	Mus_musculus	455346	0	0	11163	22388	0	23257	19770	21569	0	0	0	0	12996	18577	0	0	0	14213	0	0	19578	0	0	0	0	0	21656	12403	21867	0	28212	0	31440	25848	25240	0	21725	0	0	1787	17747	11237
OTU5	Taxa4	Mammalia	Carnivora	Canidae	Canis	Canis_lupus	454337	0	7045	11388	17767	37831	8650	0	6547	6961	0	16195	3798	0	3687	3376	0	10003	4860	13346	9418	21162	14340	8883	4723	8872	6368	0	0	11996	7320	42127	7240	4345	14236	9947	15579	36828	0	0	4991	4818	0
OTU9	Taxa5	Mammalia	Artiodactyla	Bovidae	Bos	Bos_indicus	216277	19822	25555	0	7962	1569	13483	6825	5851	1499	0	4016	0	2818	0	3499	3212	9028	10960	4575	9408	2183	2136	3620	7366	3536	3895	12452	0	3477	7555	6741	11038	0	7236	0	9789	0	0	0	1316	0	0
OTU100_13_140_21_22_33_38_46_54_87_90_93	Taxa6	Mammalia	Primates	Hominidae	Homo	Homo_sapiens	145288	0	0	0	322	0	0	0	0	0	0	3511	0	0	0	0	0	0	0	0	0	0	0	0	0	0	0	0	0	0	9819	0	0	1817	6269	0	1003	0	0	0	73293	0	0
OTU11	Taxa7	Mammalia	Rodentia	Cricetidae	Microtus	Microtus_agrestis	114424	0	4668	0	10468	0	15103	0	0	10285	0	0	0	0	0	1652	10034	5754	0	0	0	0	10904	0	6453	13551	5481	0	0	0	0	0	0	0	0	0	0	0	0	0	0	0	0
OTU12	Taxa8	Mammalia	Artiodactyla	Bovidae	Ovis	Ovis_spp.	93109	1571	0	0	3368	0	0	0	0	0	0	0	0	0	0	0	0	0	0	0	11306	0	0	0	0	0	0	0	72691	0	4173	0	0	0	0	0	0	0	0	0	0	0	0
OTU15	Taxa9	Amphibian	Anura	Bufonidae	Bufo	Bufo_bufo	53100	0	1361	13226	0	0	5342	0	0	1229	1083	4628	2686	0	0	2062	924	0	0	0	2952	0	0	0	8781	1691	3982	0	0	0	0	0	900	0	0	0	0	0	0	0	0	0	0
OTU23	Taxa10	Mammalia	Primates	Hominidae	Pan	Pan_troglodytes	43476	0	0	0	0	0	0	0	0	0	0	805	0	0	0	0	0	0	0	0	0	0	0	0	0	0	0	0	0	0	2361	0	0	0	0	0	0	0	0	0	25066	0	0
OTU17	Taxa11	Mammalia	Rodentia	Cricetidae	Myodes	Myodes_glareolus	35696	0	0	0	11005	0	0	0	0	0	0	0	0	0	0	1852	0	0	0	5830	0	0	0	0	0	0	0	0	0	17009	0	0	0	0	0	0	0	0	0	0	0	0	0
OTU19	Taxa12	Mammalia	Eulipotyphla	Erinaceidae	Erinaceus	Erinaceus_europaeus	32037	0	0	0	13314	0	0	0	0	0	0	0	0	13626	5097	0	0	0	0	0	0	0	0	0	0	0	0	0	0	0	0	0	0	0	0	0	0	0	0	0	0	0	0
OTU27	Taxa14	Mammalia	Perissodactyla	Equidae	Equus	Equus_caballus	13460	3430	0	0	0	0	0	0	0	0	0	5745	2053	0	0	972	0	0	0	0	1260	0	0	0	0	0	0	0	0	0	0	0	0	0	0	0	0	0	0	0	0	0	0
OTU30	Taxa15	Mammalia	Chiroptera	Vespertilionidae	Pipistrellus	Pipistrellus_pygmaeus	12428	0	0	0	0	0	0	0	0	0	11152	0	0	0	0	0	0	0	0	0	1276	0	0	0	0	0	0	0	0	0	0	0	0	0	0	0	0	0	0	0	0	0	0
OTU32	Taxa16	Mammalia	Artiodactyla	Bovidae	Capra	Capra_hircus	7636	0	0	0	0	7636	0	0	0	0	0	0	0	0	0	0	0	0	0	0	0	0	0	0	0	0	0	0	0	0	0	0	0	0	0	0	0	0	0	0	0	0	0
OTU37	Taxa17	Mammalia	Carnivora	Felidae	Felis	Felis_silvestris	4394	0	0	0	0	0	0	0	0	0	0	0	0	0	0	0	0	0	0	0	0	0	0	0	0	0	0	0	0	0	0	0	0	0	0	0	0	0	0	0	4394	0	0
OTU42	Taxa18	Mammalia	Carnivora	Canidae	Vulpes	Vulpes_vulpes	3607	0	0	0	0	0	0	0	0	0	0	0	0	0	0	0	0	3607	0	0	0	0	0	0	0	0	0	0	0	0	0	0	0	0	0	0	0	0	0	0	0	0	0
OTU43	Taxa19	Mammalia	Chiroptera	Vespertilionidae	Eptesicus	Eptesicus_spp.	3261	0	3261	0	0	0	0	0	0	0	0	0	0	0	0	0	0	0	0	0	0	0	0	0	0	0	0	0	0	0	0	0	0	0	0	0	0	0	0	0	0	0	0
OTU45	Taxa20	Mammalia	Lagomorpha	Leporidae	Lepus	Lepus_europaeus	3075	0	0	0	0	0	0	0	0	0	0	0	0	0	0	0	0	0	0	0	0	0	0	3075	0	0	0	0	0	0	0	0	0	0	0	0	0	0	0	0	0	0	0
OTU44	Taxa21	Mammalia	Rodentia	Sciuridae	Sciurus	Sciurus_spp.	2840	0	0	0	0	0	0	0	0	0	629	0	2211	0	0	0	0	0	0	0	0	0	0	0	0	0	0	0	0	0	0	0	0	0	0	0	0	0	0	0	0	0	0
OTU57	Taxa23	Mammalia	Rodentia	Muridae	Rattus	Rattus_norvegicus	1536	0	0	0	0	0	0	0	0	0	0	0	0	0	0	0	0	0	0	0	0	0	0	0	0	1536	0	0	0	0	0	0	0	0	0	0	0	0	0	0	0	0	0
OTU61	Taxa24	Mammalia	Artiodactyla	Cervidae	Dama	Dama_dama	1452	0	0	0	0	0	0	0	1068	0	0	0	0	0	0	0	0	0	0	0	0	0	0	0	0	0	45	0	0	0	0	0	0	0	0	127	0	0	0	0	0	0	0
OTU62	Taxa25	Mammalia	Rodentia	Muridae	Apodemus	Apodemus_flavicollis	1424	0	0	0	0	0	0	0	0	0	0	0	0	0	0	0	0	0	0	0	0	0	0	1424	0	0	0	0	0	0	0	0	0	0	0	0	0	0	0	0	0	0	0
OTU79	Taxa27	Aves	Passeriformes	Corvidae	Pica	Pica_pica	1133	0	0	0	0	0	0	0	0	0	0	0	77	0	0	0	326	0	0	0	0	0	0	0	56	0	0	0	0	0	0	0	0	0	0	0	0	0	0	0	388	0	0
OTU118	Taxa30	Aves	Galliforme	Phasianidae	Gallus	Gallus_gallus	113	0	0	0	0	0	0	0	0	0	0	0	0	0	0	0	0	0	0	0	0	0	0	0	0	0	0	0	0	0	113	0	0	0	0	0	0	0	0	0	0	0	0
[truncated: 18 more columns]
