# Supplementary material for: Advanced airborne eDNA sampling allows robust spatiotemporal characterisation of vertebrate communities
Source: Research Square preprint supplement (doi:10.21203/rs.3.rs-5693469/v1), 2025-02-13
Supplement: Supplementary file 5 [file bb21d41523417b0c0d903c00.xlsx]

## Sheet: Sample information
Sample site	Sample ID	Day	Mounting date	Removing date	Timer start	Timer end	Time run
Site A	A1_12V	Day1	2023-09-06	2023-09-07	615,9	639.9	24
	A1_12VX5	Day1	2023-09-06	2023-09-07	615.9	639.9	24
	A1_5V	Day1	2023-09-06	2023-09-07	48	72.1	24.1
	A1_5VX12	Day1	2023-09-06	2023-09-07	48	72.1	24.1
	A1_12VP	Day1	2023-09-06	2023-09-07	N/A	N/A
	A1_5VP	Day1	2023-09-06	2023-09-07	N/A	N/A
Site B	B1_12V	Day1	2023-09-06	2023-09-07	659.6	683.6	24
	B1_12VX5	Day1	2023-09-06	2023-09-07	659.6	683.6	24
	B1_5V	Day1	2023-09-06	2023-09-07	40.2	64.2	24
	B1_5VX12	Day1	2023-09-06	2023-09-07	40.2	64.2	24
	B1_12VP	Day1	2023-09-06	2023-09-07	N/A	N/A
	B1_5VP	Day1	2023-09-06	2023-09-07	N/A	N/A
Site C	C1_12V	Day1	2023-09-06	2023-09-07	631.4	655.3	23.9
	C1_12VX5	Day1	2023-09-06	2023-09-07	631.4	655.3	23.9
	C1_5V	Day1	2023-09-06	2023-09-07	34.2	58.7	24.5
	C1_5VX12	Day1	2023-09-06	2023-09-07	34.2	58.7	24.5
	C1_12VP	Day1	2023-09-06	2023-09-07	N/A	N/A
	C1_5VP	Day1	2023-09-06	2023-09-07	N/A	N/A
Site D	D1_12V	Day1	2023-09-06	2023-09-07	639.1	662.8	23.7
	D1_12VX5	Day1	2023-09-06	2023-09-07	639.1	662.8	23.7
	D1_5V	Day1	2023-09-06	2023-09-07	35.9	59.7	23.8
	D1_5VX12	Day1	2023-09-06	2023-09-07	35.9	59.7	23.8
	D1_12VP	Day1	2023-09-06	2023-09-07	N/A	N/A
	D1_5VP	Day1	2023-09-06	2023-09-07	N/A	N/A
Site E	E1_12V	Day1	2023-09-06	2023-09-07	516	539.7	23.7
	E1_12VX5	Day1	2023-09-06	2023-09-07	516	539.7	23.7
	E1_5V	Day1	2023-09-06	2023-09-07	34.9	58.6	23.7
	E1_5VX12	Day1	2023-09-06	2023-09-07	34.9	58.6	23.7
	E1_12VP	Day1	2023-09-06	2023-09-07	N/A	N/A
	E1_5VP	Day1	2023-09-06	2023-09-07	N/A	N/A
Site F	F1_12V	Day1	2023-09-06	2023-09-07	664	687.9	23.9
	F1_12VX5	Day1	2023-09-06	2023-09-07	664	687.9	23.9
	F1_5V	Day1	2023-09-06	2023-09-07	40.6	64.6	24
	F1_5VX12	Day1	2023-09-06	2023-09-07	40.6	64.6	24
	F1_12VP	Day1	2023-09-06	2023-09-07	N/A	N/A
	F1_5VP	Day1	2023-09-06	2023-09-07	N/A	N/A
Site G	G1_12V	Day1	2023-09-06	2023-09-07	620.5	644.3	23.8
	G1_12VX5	Day1	2023-09-06	2023-09-07	620.5	644.3	23.8
	G1_5V	Day1	2023-09-06	2023-09-07	38.3	62.2	23.9
	G1_5VX12	Day1	2023-09-06	2023-09-07	38.3	62.2	23.9
	G1_12VP	Day1	2023-09-06	2023-09-07	N/A	N/A
	G1_5VP	Day1	2023-09-06	2023-09-07	N/A	N/A
Site H	H1_12V	Day1	2023-09-06	2023-09-07	44.7	68.4	23.7
	H1_12VX5	Day1	2023-09-06	2023-09-07	44.7	68.4	23.7
	H1_5V	Day1	2023-09-06	2023-09-07	40.3	64.2	23.9
	H1_5VX12	Day1	2023-09-06	2023-09-07	40.3	64.2	23.9
	H1_12VP	Day1	2023-09-06	2023-09-07	N/A	N/A
	H1_5VP	Day1	2023-09-06	2023-09-07	N/A	N/A
Site I	I1_12V	Day1	2023-09-06	2023-09-07	24.6	48.4	23.8
	I1_12VX5	Day1	2023-09-06	2023-09-07	24.6	48.4	23.8
	I1_5V	Day1	2023-09-06	2023-09-07	37.4	61.2	23.8
	I1_5VX12	Day1	2023-09-06	2023-09-07	37.4	61.2	23.8
	I1_12VP	Day1	2023-09-06	2023-09-07	N/A	N/A
	I1_5VP	Day1	2023-09-06	2023-09-07	N/A	N/A
Site J	J1_12V	Day1	2023-09-06	2023-09-07	24.8	48.5	23.7
	J1_12VX5	Day1	2023-09-06	2023-09-07	24.8	48.5	23.7
	J1_5V	Day1	2023-09-06	2023-09-07	36.5	60.4	23.9
	J1_5VX12	Day1	2023-09-06	2023-09-07	36.5	60.4	23.9
	J1_12VP	Day1	2023-09-06	2023-09-07	N/A	N/A
	J1_5VP	Day1	2023-09-06	2023-09-07	N/A	N/A
Site A	A2_12V	Day2	2023-09-07	2023-09-08	639.9	663.7	23.8
	A2_12VX5	Day2	2023-09-07	2023-09-08	639.9	663.7	23.8
	A2_5V	Day2	2023-09-07	2023-09-08	72.1	94	21.9
	A2_5VX12	Day2	2023-09-07	2023-09-08	72.1	94	21.9
	A2_12VP	Day2	2023-09-07	2023-09-08	N/A	N/A
	A2_5VP	Day2	2023-09-07	2023-09-08	N/A	N/A
Site B	B2_12V	Day2	2023-09-07	2023-09-08	683.6	707.4	23.8
	B2_12VX5	Day2	2023-09-07	2023-09-08	683.6	707.4	23.8
	B2_5V	Day2	2023-09-07	2023-09-08	64.2	88.1	23.9
	B2_5VX12	Day2	2023-09-07	2023-09-08	64.2	88.1	23.9
	B2_12VP	Day2	2023-09-07	2023-09-08	N/A	N/A
	B2_5VP	Day2	2023-09-07	2023-09-08	N/A	N/A
Site C	C2_12V	Day2	2023-09-07	2023-09-08	655.3	679.1	23.8
	C2_12VX5	Day2	2023-09-07	2023-09-08	655.3	679.1	23.8
	C2_5V	Day2	2023-09-07	2023-09-08	58.7	83.6	24.9
	C2_5VX12	Day2	2023-09-07	2023-09-08	58.7	83.6	24.9
	C2_12VP	Day2	2023-09-07	2023-09-08	N/A	N/A
	C2_5VP	Day2	2023-09-07	2023-09-08	N/A	N/A
Site D	D2_12V	Day2	2023-09-07	2023-09-08	662.8	686.7	23.9
	D2_12VX5	Day2	2023-09-07	2023-09-08	662.8	686.7	23.9
	D2_5V	Day2	2023-09-07	2023-09-08	59.7	83.5	23.8
	D2_5VX12	Day2	2023-09-07	2023-09-08	59.7	83.5	23.8
	D2_12VP	Day2	2023-09-07	2023-09-08	N/A	N/A
	D2_5VP	Day2	2023-09-07	2023-09-08	N/A	N/A
Site E	E2_12V	Day2	2023-09-07	2023-09-08	539.7	563.5	23.8
	E2_12VX5	Day2	2023-09-07	2023-09-08	539.7	563.5	23.8
	E2_5V	Day2	2023-09-07	2023-09-08	58.6	80.9	22.3
	E2_5VX12	Day2	2023-09-07	2023-09-08	58.6	80.9	22.3
	E2_12VP	Day2	2023-09-07	2023-09-08	N/A	N/A
	E2_5VP	Day2	2023-09-07	2023-09-08	N/A	N/A
Site F	F2_12V	Day2	2023-09-07	2023-09-08	687.9	711.7	23.8
	F2_12VX5	Day2	2023-09-07	2023-09-08	687.9	711.7	23.8
	F2_5V	Day2	2023-09-07	2023-09-08	64.6	88.5	23.9
	F2_5VX12	Day2	2023-09-07	2023-09-08	64.6	88.5	23.9
	F2_12VP	Day2	2023-09-07	2023-09-08	N/A	N/A
	F2_5VP	Day2	2023-09-07	2023-09-08	N/A	N/A
Site G	G2_12V	Day2	2023-09-07	2023-09-08	644.3	668.2	23.9
	G2_12VX5	Day2	2023-09-07	2023-09-08	644.3	668.2	23.9
	G2_5V	Day2	2023-09-07	2023-09-08	62.2	82	19.8
	G2_5VX12	Day2	2023-09-07	2023-09-08	62.2	82	19.8
	G2_12VP	Day2	2023-09-07	2023-09-08	N/A	N/A
	G2_5VP	Day2	2023-09-07	2023-09-08	N/A	N/A
Site H	H2_12V	Day2	2023-09-07	2023-09-08	68.4	92.3	23.9
	H2_12VX5	Day2	2023-09-07	2023-09-08	68.4	92.3	23.9
	H2_5V	Day2	2023-09-07	2023-09-08	64.2	87	22.8
	H2_5VX12	Day2	2023-09-07	2023-09-08	64.2	87	22.8
	H2_12VP	Day2	2023-09-07	2023-09-08	N/A	N/A
	H2_5VP	Day2	2023-09-07	2023-09-08	N/A	N/A
Site I	I2_12V	Day2	2023-09-07	2023-09-08	48.4	72.1	23.7
	I2_12VX5	Day2	2023-09-07	2023-09-08	48.4	72.1	23.7
	I2_5V	Day2	2023-09-07	2023-09-08	61.2	80.7	19.5
	I2_5VX12	Day2	2023-09-07	2023-09-08	61.2	80.7	19.5
	I2_12VP	Day2	2023-09-07	2023-09-08	N/A	N/A
	I2_5VP	Day2	2023-09-07	2023-09-08	N/A	N/A
Site J	J2_12V	Day2	2023-09-07	2023-09-08	48.5	72.2	23.7
	J2_12VX5	Day2	2023-09-07	2023-09-08	48.5	72.2	23.7
	J2_5V	Day2	2023-09-07	2023-09-08	60.4	83	23.8
	J2_5VX12	Day2	2023-09-07	2023-09-08	60.4	83	23.8
	J2_12VP	Day2	2023-09-07	2023-09-08	N/A	N/A
	J2_5VP	Day2	2023-09-07	2023-09-08	N/A	N/A
Site A	A3_12V	Day3	2023-09-08	2023-09-09	663.7	687.4	23.7
	A3_12VX5	Day3	2023-09-08	2023-09-09	663.7	687.4	23.7
	A3_5V	Day3	2023-09-08	2023-09-09	94	117.7	23.8
	A3_5VX12	Day3	2023-09-08	2023-09-09	94	117.7	23.8
	A3_12VP	Day3	2023-09-08	2023-09-09	N/A	N/A
	A3_5VP	Day3	2023-09-08	2023-09-09	N/A	N/A
Site B	B3_12V	Day3	2023-09-08	2023-09-09	707.4	731	23.6
	B3_12VX5	Day3	2023-09-08	2023-09-09	707.4	731	23.6
	B3_5V	Day3	2023-09-08	2023-09-09	88.1	111.8	23.8
	B3_5VX12	Day3	2023-09-08	2023-09-09	88.1	111.8	23.8
	B3_12VP	Day3	2023-09-08	2023-09-09	N/A	N/A
	B3_5VP	Day3	2023-09-08	2023-09-09	N/A	N/A
Site C	C3_12V	Day3	2023-09-08	2023-09-09	679.1	702.5	23.4
	C3_12VX5	Day3	2023-09-08	2023-09-09	679.1	702.5	23.4
	C3_5V	Day3	2023-09-08	2023-09-09	83.6	106.4	23.8
	C3_5VX12	Day3	2023-09-08	2023-09-09	83.6	106.4	23.8
	C3_12VP	Day3	2023-09-08	2023-09-09	N/A	N/A
	C3_5VP	Day3	2023-09-08	2023-09-09	N/A	N/A
Site D	D3_12V	Day3	2023-09-08	2023-09-09	686.7	710.1	23.4
	D3_12VX5	Day3	2023-09-08	2023-09-09	686.7	710.1	23.4
	D3_5V	Day3	2023-09-08	2023-09-09	83.5	107	23.8
	D3_5VX12	Day3	2023-09-08	2023-09-09	83.5	107	23.8
	D3_12VP	Day3	2023-09-08	2023-09-09	N/A	N/A
	D3_5VP	Day3	2023-09-08	2023-09-09	N/A	N/A
Site E	E3_12V	Day3	2023-09-08	2023-09-09	563.5	586.7	23.2
	E3_12VX5	Day3	2023-09-08	2023-09-09	563.5	586.7	23.2
	E3_5V	Day3	2023-09-08	2023-09-09	80.9	104.3	23.8
	E3_5VX12	Day3	2023-09-08	2023-09-09	80.9	104.3	23.8
	E3_12VP	Day3	2023-09-08	2023-09-09	N/A	N/A
	E3_5VP	Day3	2023-09-08	2023-09-09	N/A	N/A
Site F	F3_12V	Day3	2023-09-08	2023-09-09	711.7	734.8	23.1
	F3_12VX5	Day3	2023-09-08	2023-09-09	711.7	734.8	23.1
	F3_5V	Day3	2023-09-08	2023-09-09	88.5	111.7	23.8
	F3_5VX12	Day3	2023-09-08	2023-09-09	88.5	111.7	23.8
	F3_12VP	Day3	2023-09-08	2023-09-09	N/A	N/A
	F3_5VP	Day3	2023-09-08	2023-09-09	N/A	N/A
Site G	G3_12V	Day3	2023-09-08	2023-09-09	668.2	691.2	23
	G3_12VX5	Day3	2023-09-08	2023-09-09	668.2	691.2	23
	G3_5V	Day3	2023-09-08	2023-09-09	82	195.1	23.8
	G3_5VX12	Day3	2023-09-08	2023-09-09	82	195.1	23.8
	G3_12VP	Day3	2023-09-08	2023-09-09	N/A	N/A
	G3_5VP	Day3	2023-09-08	2023-09-09	N/A	N/A
Site H	H3_12V	Day3	2023-09-08	2023-09-09	92.3	115.2	22.9
	H3_12VX5	Day3	2023-09-08	2023-09-09	92.3	115.2	22.9
	H3_5V	Day3	2023-09-08	2023-09-09	87	110	23.8
	H3_5VX12	Day3	2023-09-08	2023-09-09	87	110	23.8
	H3_12VP	Day3	2023-09-08	2023-09-09	N/A	N/A
	H3_5VP	Day3	2023-09-08	2023-09-09	N/A	N/A
Site I	I3_12V	Day3	2023-09-08	2023-09-09	72.1	95.6	23.5
	I3_12VX5	Day3	2023-09-08	2023-09-09	72.1	95.6	23.5
	I3_5V	Day3	2023-09-08	2023-09-09	80.7	104.4	23.8
	I3_5VX12	Day3	2023-09-08	2023-09-09	80.7	104.4	23.8
	I3_12VP	Day3	2023-09-08	2023-09-09	N/A	N/A
	I3_5VP	Day3	2023-09-08	2023-09-09	N/A	N/A
Site J	J3_12V	Day3	2023-09-08	2023-09-09	72.2	95.7	23.5
	J3_12VX5	Day3	2023-09-08	2023-09-09	72.2	95.7	23.5
	J3_5V	Day3	2023-09-08	2023-09-09	83	106.5	23.8
	J3_5VX12	Day3	2023-09-08	2023-09-09	83	106.5	23.8
	J3_12VP	Day3	2023-09-08	2023-09-09	N/A	N/A
	J3_5VP	Day3	2023-09-08	2023-09-09	N/A	N/A

## Sheet: Site information
Sample site	Latitude	Longitude
Site A	56°50'05"N	10°15'06"E
Site B	56°50'04"N	10°15'04"E
Site C	56°50'03"N	10°15'02"E
Site D	56°50'03"N	10°15'00"E
Site E	56°50'02"N	10°14'58"E
Site F	56°50'01"N	10°14'58"E
Site G	56°50'01"N	10°14'57"E
Site H	56°50'02"N	10°14'55"E
Site I	56°50'02"N	10°14'54"E
Site J	56°50'04"N	10°14'52"E
