# Supplementary material for: Advanced airborne eDNA sampling allows robust spatiotemporal characterisation of vertebrate communities
Source: Research Square preprint supplement (doi:10.21203/rs.3.rs-5693469/v1), 2025-02-13
Supplement: Supplementary file 6 [file ddce78f9d416e0c3acaa07f8.xlsx]

## Sheet: Sheet1
Sampler Code	Sample ID	Storage method	Date	Direction	Timer start	Timer stop	Running time	Longitude	Latitude
Æ01	Æ01_D	Frozen	30/8/23-31/08/23	184 S°	378.3	402.1	23.8	55° 38,400'N	10° 09,986'E
	Æ01_W	Longmire's buffer
Æ02	Æ02_D	Frozen	30/8/23-31/08/23	182 S°	593.4	617.2	23.8	55° 38,395'N	10° 10,009'E
	Æ02_W	Longmire's buffer
Æ03	Æ03_D	Frozen	30/8/23-31/08/23	158 S°	472.1	495.8	23.7	55° 38,389'N	10° 10,017'E
	Æ03_W	Longmire's buffer
Æ04	Æ04_D	Frozen	30/8/23-31/08/23	193 S°	592.1	615.8	23.7	55° 38,380'N	10° 10,026'E
	Æ04_W	Longmire's buffer
Æ05	Æ05_D	Frozen	30/8/23-31/08/23	206 SW°	569.4	593.2	23.8	55° 38,372'N	10° 10,035'E
	Æ05_W	Longmire's buffer
Æ06	Æ06_D	Frozen	30/8/23-31/08/23	197 S°	355.1	374.1	19	55° 38,360'N	10° 10,026'E
	Æ06_W	Longmire's buffer
Æ07	Æ07_D	Frozen	30/8/23-31/08/23	274 W°	355.1	379.8	24.7	55° 38,349'N	10° 10,035'E
	Æ07_W	Longmire's buffer
Æ08	Æ08_D	Frozen	30/8/23-31/08/23	264 W°	0	20.2	20.2	55° 38,348'N	10° 10,050'E
	Æ08_W	Longmire's buffer
Æ09	Æ09_D	Frozen	30/8/23-31/08/23	171 S°	615	635.5	20.5	55° 38,336'N	10° 10,073'E
	Æ09_W	Longmire's buffer
Æ10	Æ10_D	Frozen	30/8/23-31/08/23	172 S°	450.4	471.1	20.7	55° 38,336'N	10° 10,089'E
	Æ10_W	Longmire's buffer
Æ11	Æ11_D	Frozen	30/8/23-31/08/23	313 NW°	471.2	491.6	20.4	55° 38,325'N	10° 10,097E
	Æ11_W	Longmire's buffer
Æ12	Æ12_D	Frozen	30/8/23-31/08/23	231 SW°	354	377.7	23.7	55° 38,315'N	10° 10,089'E
	Æ12_W	Longmire's buffer
Æ13	Æ13_D	Frozen	30/8/23-31/08/23	3 N°	0	20.1	20.1	55° 38,302'N	10° 10,105'E
	Æ13_W	Longmire's buffer
Æ14	Æ14_D	Frozen	30/8/23-31/08/23	175 S°	354.6	378.3	23.7	55° 38,306'N	10° 10,124'E
	Æ14_W	Longmire's buffer
Æ15	Æ15_D	Frozen	30/8/23-31/08/23	322 NW°	308.8	332.4	23.6	55° 38,295'N	10° 10,141'E
	Æ15_W	Longmire's buffer
Æ16	Æ16_D	Frozen	30/8/23-31/08/23	215 SW°	615.7	639.2	23.5	55° 38,287'N	10° 10,172'E
	Æ16_W	Longmire's buffer
Æ17	Æ17_D	Frozen	30/8/23-31/08/23	310 NW°	447.1	466.5	19.4	55° 38,267'N	10° 10.194'E
	Æ17_W	Longmire's buffer
Æ18	Æ18_D	Frozen	30/8/23-31/08/23	242 SW°	19.1	39	19.9	55° 38,261'N	10° 10,183'E
	Æ18_W	Longmire's buffer
Æ19	Æ19_D	Frozen	30/8/23-31/08/23	347 N°	615.3	638.8	23.5	55° 38,245'N	10° 10,180'E
	Æ19_W	Longmire's buffer
Æ20	Æ20_D	Frozen	30/8/23-31/08/23	222 SW°	616.3	639.7	23.4	55° 38,224'N	10° 10,181'E
	Æ20_W	Longmire's buffer
