# Supplementary material for: Advanced airborne eDNA sampling allows robust spatiotemporal characterisation of vertebrate communities
Source: Research Square preprint supplement (doi:10.21203/rs.3.rs-5693469/v1), 2025-02-13
Supplement: Supplementary file 7 [file df7b370599b99ee755caae02.xlsx]

## Sheet: qPCR_BirT
Sample	Filter_Type	Date	Ct value (average of triplicates)	qPCR_Batch	Log tranformed DNA Cncentration (ng/μl)
F1	ISO ePM10 65%	D3	31.1	Batch1	-4.76901
F10	ISO ePM10 65%	D3	30.4667	Batch1	-4.59841
F14	ISO ePM 2.5 70%	D1	33.0533	Batch1	-5.29519
F15	ISO ePM10 65%	D1	30.0367	Batch1	-4.48258
F16	ISO ePM10 65%	D3	29.9	Batch1	-4.44576
F17	ISO ePM 2.5 70%	D2	31.2833	Batch1	-4.8184
F18	ISO ePM10 65%	D3	30.3167	Batch1	-4.558
F19	ISO ePM1 65% (company 2)	D3	32.1533	Batch1	-5.05275
F2	ISO ePM10 65%	D3	29.9733	Batch1	-4.46552
F20	ISO ePM 2.5 70%	D1	31.0233	Batch1	-4.74836
F21	ISO ePM1 65% (company 1)	D2	32.7267	Batch1	-5.20719
F23	ISO ePM 2.5 70%	D3	32.5867	Batch1	-5.16948
F24	ISO ePM10 65%	D1	29.63	Batch1	-4.37303
F26	ISO ePM1 65% (company 1)	D2	31.18	Batch1	-4.79056
F27	ISO ePM1 65% (company 2)	D3	31.8767	Batch1	-4.97823
F28	ISO ePM1 65% (company 1)	D2	30.7467	Batch1	-4.67383
F29	ISO ePM1 65% (company 1)	D1	33.2267	Batch1	-5.34188
F3	ISO ePM1 65% (company 2)	D1	31.3833	Batch1	-4.84533
F30	ISO ePM1 65% (company 2)	D1	31.02	Batch1	-4.74746
F31	ISO ePM 2.5 70%	D2	29.8967	Batch2	-4.31587
F32	ISO ePM1 65% (company 2)	D1	31.0233	Batch2	-4.60178
F33	ISO ePM1 65% (company 1)	D1	32.43	Batch2	-4.95876
F34	ISO ePM1 65% (company 1)	D3	31.12	Batch2	-4.62632
F36	ISO ePM1 65% (company 2)	D3	32.09	Batch2	-4.87248
F37	ISO ePM1 65% (company 1)	D1	32.2133	Batch2	-4.90378
F39	ISO ePM 2.5 70%	D2	30.41	Batch2	-4.44614
F40	ISO ePM1 65% (company 1)	D3	32.7333	Batch2	-5.03574
F41	ISO ePM 2.5 70%	D3	31.8967	Batch2	-4.82341
F42	ISO ePM1 65% (company 2)	D2	31.0067	Batch2	-4.59756
F43	ISO ePM1 65% (company 2)	D2	30.19	Batch2	-4.39031
F44	ISO ePM 2.5 70%	D3	31.19	Batch2	-4.64408
F45	ISO ePM1 65% (company 1)	D1	30.5367	Batch2	-4.47828
F46	ISO ePM 2.5 70%	D3	31.42	Batch2	-4.70245
F47	ISO ePM10 65%	D2	28.7633	Batch2	-4.02825
F48	ISO ePM 2.5 70%	D3	31.0333	Batch2	-4.60432
F5	ISO ePM10 65%	D2	29.6833	Batch1	-4.3874
F50	ISO ePM1 65% (company 2)	D2	30.59	Batch2	-4.49182
F52	ISO ePM1 65% (company 2)	D3	30.3267	Batch2	-4.42499
F53	ISO ePM 2.5 70%	D1	30.8533	Batch2	-4.55864
F54	ISO ePM1 65% (company 1)	D2	30.49	Batch2	-4.46644
F55	ISO ePM10 65%	D1	31.2367	Batch2	-4.65592
F56	ISO ePM1 65% (company 2)	D3	30.08	Batch2	-4.36239
F57	ISO ePM1 65% (company 2)	D1	30.5933	Batch2	-4.49266
F58	ISO ePM1 65% (company 2)	D3	30.5967	Batch2	-4.49351
F59	ISO ePM 2.5 70%	D1	31.0533	Batch2	-4.6094
F60	ISO ePM 2.5 70%	D3	31.47	Batch3	-4.55466
F61	ISO ePM1 65% (company 1)	D1	33.2733	Batch3	-4.99568
F62	ISO ePM10 65%	D2	29.62	Batch3	-4.10223
F63	ISO ePM10 65%	D3	30.14	Batch3	-4.2294
F64	ISO ePM1 65% (company 1)	D3	31.42	Batch3	-4.54243
F66	ISO ePM1 65% (company 2)	D2	29.8367	Batch3	-4.15521
F68	ISO ePM1 65% (company 2)	D1	30.5767	Batch3	-4.33619
F69	ISO ePM1 65% (company 2)	D1	30.15	Batch3	-4.23184
F7	ISO ePM 2.5 70%	D1	31.3433	Batch1	-4.83456
F70	ISO ePM1 65% (company 1)	D3	32.5333	Batch3	-4.81471
F71	ISO ePM1 65% (company 1)	D3	31.9867	Batch3	-4.68101
F72	ISO ePM1 65% (company 2)	D2	29.7567	Batch3	-4.13565
F73	ISO ePM 2.5 70%	D1	30.9	Batch3	-4.41526
F74	ISO ePM 2.5 70%	D2	30.07	Batch3	-4.21228
F75	ISO ePM1 65% (company 1)	D3	32.3633	Batch3	-4.77313
F76	ISO ePM10 65%	D2	28.9733	Batch3	-3.94408
F78	ISO ePM1 65% (company 2)	D2	30.8767	Batch3	-4.40955
F79	ISO ePM10 65%	D2	29.5433	Batch3	-4.08348
F8	ISO ePM1 65% (company 1)	D2	31.56	Batch1	-4.89292
F80	ISO ePM10 65%	D2	29.6	Batch3	-4.09733
F81	ISO ePM1 65% (company 1)	D1	31.0933	Batch3	-4.46254
F82	ISO ePM10 65%	D1	28.76	Batch3	-3.89191
F83	ISO ePM 2.5 70%	D2	30.6333	Batch3	-4.35004
F84	ISO ePM10 65%	D2	29.05	Batch3	-3.96283
F9	ISO ePM1 65% (company 1)	D2	32.4933	Batch1	-5.14434
