# Supplementary material for: Advanced airborne eDNA sampling allows robust spatiotemporal characterisation of vertebrate communities
Source: Research Square preprint supplement (doi:10.21203/rs.3.rs-5693469/v1), 2025-02-13
Supplement: Supplementary file 8 [file e9246cec2a0849ab277881b7.xlsx]

## Sheet: Samples
Sampler	Sample_ID	Day	Date (filter addition)	Date (filter collection)	Filter type	Starting time (first filter instalment)	Starting time_Timer	Ending time_Timer	Running time	Seeing bird species	Comments
S1	S1_D1	Day1	2022-11-02	2022-11-03	M6	11:45 a.m.	118.2	142	22.8	Great tits were singing around, Flying mallards	Dropped
S2	S2_D1	Day1	2022-11-02	2022-11-03	F7 (FB)		119.5	143.2	22.7
S3	S3_D1	Day1	2022-11-02	2022-11-03	F7 (FB)		95.4	119.2	22.8
S4	S4_D1	Day1	2022-11-02	2022-11-03	F7 (LF)		355.4	379.1	22.7
S5	S5_D1	Day1	2022-11-02	2022-11-03	M6		355.7	379.3	22.6
S6	S6_D1	Day1	2022-11-02	2022-11-03	F7 (LF)		95.4	119	22.6
S7	S7_D1	Day1	2022-11-02	2022-11-03	F8		123	146.6	22.6
S8	S8_D1	Day1	2022-11-02	2022-11-03	F8		118.8	142.4	22.6
S9	S9_D1	Day1	2022-11-02	2022-11-03	F8		142.2	165.7	22.5
S10	S10_D1	Day1	2022-11-02	2022-11-03	F8		378.4	401.9	22.5
S11	S11_D1	Day1	2022-11-02	2022-11-03	M6		380.8	404.3	22.5
S12	S12_D1	Day1	2022-11-02	2022-11-03	F8		378.8	404.2	24.4
S13	S13_D1	Day1	2022-11-02	2022-11-03	M6		373.3	396.7	22.4
S14	S14_D1	Day1	2022-11-02	2022-11-03	F7 (FB)		380.7	404.1	22.4
S15	S15_D1	Day1	2022-11-02	2022-11-03	M6		380.1	403.4	22.3
S16	S16_D1	Day1	2022-11-02	2022-11-03	F7 (LF)		380.6	403.9	22.3
S17	S17_D1	Day1	2022-11-02	2022-11-03	F7 (LF)		379.9	403.1	22.2
S18	S18_D1	Day1	2022-11-02	2022-11-03	M6		379.6	404.3	23.7
S19	S19_D1	Day1	2022-11-02	2022-11-03	F8		380.6	403.9	22.3
S20	S20_D1	Day1	2022-11-02	2022-11-03	F7 (LF)		381.2	404.4	22.2
S21	S21_D1	Day1	2022-11-02	2022-11-03	F7 (FB)		235.7	258.9	22.2	Snipe flew away near the sampler
S22	S22_D1	Day1	2022-11-02	2022-11-03	F7 (LF)		380.7	403.9	22.2
S23	S23_D1	Day1	2022-11-02	2022-11-03	F7 (FB)		380.2	403.4	22.2		Dropped
S24	S24_D1	Day1	2022-11-02	2022-11-03	F8		230.5	253.6	22.1
S25	S25_D1	Day1	2022-11-02	2022-11-03	F7 (LF)		379.9	403	22.1
S26	S26_D1	Day1	2022-11-02	2022-11-03	F7 (FB)		260.2	283.3	22.1
S27	S27_D1	Day1	2022-11-02	2022-11-03	F7 (FB)		119.2	142.3	22.1
S28	S28_D1	Day1	2022-11-02	2022-11-03	M6		238.6	261.7	22.1
S1	S1_D2	Day2	2022-11-03	2022-11-04	F7 (FB)	12:30 p.m.	142	165.3	22.3	Great tits were singing around, a flowck of starlings (around 50), Crows, Jackadow
S2	S2_D2	Day2	2022-11-03	2022-11-04	F7 (LF)		143.2	166.6	22.4		Rain cover was blown away/ Dropped
S3	S3_D2	Day2	2022-11-03	2022-11-04	M6		119.2	142.4	22.2		Rain cover was blown away/ Dropped
S4	S4_D2	Day2	2022-11-03	2022-11-04	M6		379.1	402.3	22.2
S5	S5_D2	Day2	2022-11-03	2022-11-04	F7 (FB)		379.3	402.6	22.3
S6	S6_D2	Day2	2022-11-03	2022-11-04	F7 (FB)		119	142.2	22.2
S7	S7_D2	Day2	2022-11-03	2022-11-04	F8		146.6	169.8	22.2
S8	S8_D2	Day2	2022-11-03	2022-11-04	F8		142.4	165.5	22.1
S9	S9_D2	Day2	2022-11-03	2022-11-04	M6		165.7	188.8	22.1
S10	S10_D2	Day2	2022-11-03	2022-11-04	F7 (FB)		401.9	424.9	22
S11	S11_D2	Day2	2022-11-03	2022-11-04	F7 (LF)		404.3	427.3	22
S12	S12_D2	Day2	2022-11-03	2022-11-04	F7 (FB)		404.2	425.2	20
S13	S13_D2	Day2	2022-11-03	2022-11-04	M6		396.7	419.7	22
S14	S14_D2	Day2	2022-11-03	2022-11-04	F8		404.1	427.1	22
S15	S15_D2	Day2	2022-11-03	2022-11-04	F8		403.4	426.3	21.9
S16	S16_D2	Day2	2022-11-03	2022-11-04	M6		403.9	426.8	21.9
S17	S17_D2	Day2	2022-11-03	2022-11-04	F7 (LF)		403.1	426	21.9
S18	S18_D2	Day2	2022-11-03	2022-11-04	F7 (LF)		404.3	425.8	20.5
S19	S19_D2	Day2	2022-11-03	2022-11-04	M6		403.9	426.8	21.9
S20	S20_D2	Day2	2022-11-03	2022-11-04	F7 (FB)		404.4	427.3	21.9
S21	S21_D2	Day2	2022-11-03	2022-11-04	F7 (LF)		258.9	281.7	21.8
S22	S22_D2	Day2	2022-11-03	2022-11-04	F8		403.9	426.7	21.8
S23	S23_D2	Day2	2022-11-03	2022-11-04	F7 (LF)		403.4	403.4	0		Forgot to plug the batteries, so didnt run :(
S24	S24_D2	Day2	2022-11-03	2022-11-04	M6		253.6	276.1	21.5
S25	S25_D2	Day2	2022-11-03	2022-11-04	F8		403	425.7	21.7
S26	S26_D2	Day2	2022-11-03	2022-11-04	F8		283.3	306	21.7
S27	S27_D2	Day2	2022-11-03	2022-11-04	F7 (LF)		142.3	165	21.7
S28	S28_D2	Day2	2022-11-03	2022-11-04	F7 (FB)		261.7	284.4	21.7
S1	S1_D3	Day3	2022-11-04	2022-11-05	F8	12:55 p.m.	165.3	188.2	21.9	Great tits, Barnacle geese, Crows, Mallards, Heron
S2	S2_D3	Day3	2022-11-04	2022-11-05	F8		166.6	189.4	21.8
S3	S3_D3	Day3	2022-11-04	2022-11-05	M6		142.4	165.2	21.8
S4	S4_D3	Day3	2022-11-04	2022-11-05	F8		402.3	421.1	17.8
S5	S5_D3	Day3	2022-11-04	2022-11-05	F7 (FB)		402.6	425.3	21.7
S6	S6_D3	Day3	2022-11-04	2022-11-05	F8		142.2	164.9	21.7
S7	S7_D3	Day3	2022-11-04	2022-11-05	F7 (LF)		169.8	192.5	21.7
S8	S8_D3	Day3	2022-11-04	2022-11-05	F7 (FB)		165.5	188.1	21.6
S9	S9_D3	Day3	2022-11-04	2022-11-05	F7 (LF)		188.8	211.4	21.6
S10	S10_D3	Day3	2022-11-04	2022-11-05	F8		424.9	447.6	21.7
S11	S11_D3	Day3	2022-11-04	2022-11-05	F7 (FB)		427.3	449.9	21.6
S12	S12_D3	Day3	2022-11-04	2022-11-05	F7 (LF)		425.2	447.8	21.6
S13	S13_D3	Day3	2022-11-04	2022-11-05	F7 (LF)		419.7	442.3	21.6
S14	S14_D3	Day3	2022-11-04	2022-11-05	M6		427.1	449.7	21.6
S15	S15_D3	Day3	2022-11-04	2022-11-05	F7 (LF)		426.3	448.9	21.6
S16	S16_D3	Day3	2022-11-04	2022-11-05	M6		426.8	449.4	21.6
S17	S17_D3	Day3	2022-11-04	2022-11-05	F8		426	448.4	21.4
S18	S18_D3	Day3	2022-11-04	2022-11-05	M6		425.8	449.3	22.5
S19	S19_D3	Day3	2022-11-04	2022-11-05	F7 (FB)		426.8	448.4	20.6
S20	S20_D3	Day3	2022-11-04	2022-11-05	F7 (FB)		427.3	449.8	21.5
S21	S21_D3	Day3	2022-11-04	2022-11-05	M6		281.7	304.2	21.5
S22	S22_D3	Day3	2022-11-04	2022-11-05	M6		426.7	449.2	21.5
S23	S23_D3	Day3	2022-11-04	2022-11-05	F8		403.4	425.9	21.5
S24	S24_D3	Day3	2022-11-04	2022-11-05	F7 (FB)		276.1	298.6	21.5
S25	S25_D3	Day3	2022-11-04	2022-11-05	F7 (LF)		425.7	448.1	21.4
S26	S26_D3	Day3	2022-11-04	2022-11-05	F7 (FB)		306	328.4	21.4
S27	S27_D3	Day3	2022-11-04	2022-11-05	M6		165	187.3	21.3
S28	S28_D3	Day3	2022-11-04	2022-11-05	F7 (LF)		284.4	306.7	21.3

## Sheet: Meta info
Sampler	Height from the ground	Direction facing	Coordinates
			Latitude	Longitude
S1	110	191 S	N 55° 35.2957'	E 12° 32.2455'
S2	119	166 S	N 55° 35.2929'	E 12° 32.2514'
S3	104	103 E	N 55° 35.2937'	E 12° 32.2556'
S4	122	191 S	N 55° 35.2928'	E 12° 32.2595'
S5	114	206 SW	N 55° 35.2907'	E 12° 32.2637'
S6	115	188 S	N 55° 35.2906'	E 12° 32.2684'
S7	116	176 S	N 55° 35.2889'	E 12° 32.2722'
S8	130	297 NW	N 55° 35.2879'	E 12° 32.2756'
S9	122	199 S	N 55° 35.2868'	E 12° 32.2791'
S10	110	159 S	N 55° 35.2865'	E 12° 32.2823'
S11	110	161 S	N 55° 35.2854'	E 12° 32.2874'
S12	132	140 SE	N 55° 35.2846'	E 12° 32.2914'
S13	112	188 S	N 55° 35.2853'	E 12° 32.2942'
S14	112	136 SE	N 55° 35.2849'	E 12° 32.2972'
S15	109	213 SW	N 55° 35.2853'	E 12° 32.3011'
S16	97	204 SW	N 55° 35.2844'	E 12° 32.3054'
S17	92	214 SW	N 55° 35.2832'	E 12° 32.3069'
S18	102	163 S	N 55° 35.2832'	E 12° 32.3110'
S19	118	167 S	N 55° 35.2822'	E 12° 32.3159'
S20	122	192 S	N 55° 35.2799'	E 12° 32.3233'
S21	121	242 SW	N 55° 35.2778'	E 12° 32.3328'
S22	118	177 S	N 55° 35.2771'	E 12° 32.3368'
S23	114	180 S	N 55° 35.2766'	E 12° 32.3390'
S24	96	212 SW	N 55° 35.2757'	E 12° 32.3460'
S25	120	213 SW	N 55° 35.2743'	E 12° 32.3479'
S26	98	218 SW	N 55° 35.2736'	E 12° 32.3528'
S27	82	180 S	N 55° 35.2723'	E 12° 32.3624'
S28	89	193 S	N 55° 35.2696'	E 12° 32.3737'
