# Supplementary material for: Advanced airborne eDNA sampling allows robust spatiotemporal characterisation of vertebrate communities
Source: Research Square preprint supplement (doi:10.21203/rs.3.rs-5693469/v1), 2025-02-13
Supplement: Supplementary file 9 [file ed6729314976f6ec39c9f34b.xlsx]

## Sheet: Overall taxonomy table
						Number of samples in which they were detected			IUCN information		Danish information
Class	Order	Family	Genus	Species (Scientific name)	Species (Common name)	Kalvebodefællede	Æbelø	Tofte Forest	IUCN status	Population status	Resident or Migratory	Active time of the year	Habitat use	Notes
Aves	Accipitriformes	Accipitridae	Accipiter	Accipiter_nisus	Eurasian Sparrowhawk	1		2	Least Concern	Stable	Resident	Year around	Forest, Savanna, Shrubland, Artificial/Terrestrial
Aves	Accipitriformes	Accipitridae	Buteo	Buteo_buteo	Eurasian Buzzard	2	14	1	Least Concern	Increasing	Resident	Year around	Forest, Savanna, Shrubland, Grassland, Wetlands (inland), Artificial/Terrestrial
Aves	Accipitriformes	Accipitridae	Haliaeetus	Haliaeetus_albicilla	White-tailed Sea-eagle		4		Least Concern	Increasing	Resident	Year around	Forest, Grassland, Wetlands (inland), Marine Neritic, Marine Intertidal, Marine Coastal/Supratidal, Artificial/Aquatic & Marine
Aves	Anseriformes	Anatidae	Anas	Anas_crecca	Common Teal	41			Least Concern	Unknown	Resident	Year around	Forest, Shrubland, Wetlands (inland), Marine Intertidal, Marine Coastal/Supratidal, Artificial/Terrestrial, Artificial/Aquatic & Marine
Aves	Anseriformes	Anatidae	Anas	Anas_platyrhynchos	Mallard	29	9	4	Least Concern	Increasing	Resident	Year around	Wetlands (inland), Artificial/Aquatic & Marine
Aves	Anseriformes	Anatidae	Anser	Anser_anser	Greylag Goose		21	5	Least Concern	Increasing	Resident	Year around	Grassland, Wetlands (inland), Artificial/Terrestrial
Aves	Anseriformes	Anatidae	Aythya	Aythya_sp.		3
Aves	Anseriformes	Anatidae	Branta	Branta_sp. (Possibly Branta_leucopsis)	Barnacle Goose	63			Least Concern	Increasing	Resident	Year around	Grassland, Marine Intertidal, Artificial/Terrestrial
Aves	Anseriformes	Anatidae	Melanitta	Melanitta_deglandi (Possibly Melanitta fusca two species were recently split)	Velvet Scoter			21	Vulnerable	Decreasing	Winter migrant	September to March	Forest, Grassland, Wetlands (inland), Marine Neritic
Aves	Anseriformes	Anatidae	Melanitta	Melanitta_sp.		2		105
Aves	Anseriformes	Anatidae	Somateria	Somateria_mollissima	Common Eider		27		Near Threatened	Unknown	Resident	Year around	Marine Neritic, Marine Intertidal, Marine Coastal/Supratidal
Aves	Anseriformes	Anatidae	Somateria	Somateria_spp.				2
Aves	Charadriiformes	Charadriidae	Pluvialis	Pluvialis_apricaria	Eurasian Golden Plover	31	3		Least Concern	Increasing	Passage migrant	August–November and April–May	Shrubland, Grassland, Wetlands (inland), Marine Neritic, Artificial/Terrestrial
Aves	Charadriiformes	Charadriidae	Vanellus	Vanellus_vanellus	Northern Lapwing	1			Near Threatened	Decreasing	Summer migrant	March-November	Shrubland, Grassland, Marine Intertidal, Artificial/Terrestrial
Aves	Charadriiformes	Laridae	Chroicocephalus	Chroicocephalus_ridibundus	Black-headed Gull	6	12		Least Concern	Unknown	Resident	Year around	Grassland, Wetlands (inland), Marine Neritic, Marine Intertidal, Marine Coastal/Supratidal, Artificial/Terrestrial, Artificial/Aquatic & Marine
Aves	Charadriiformes	Laridae	Larus	Larus_sp.		24		11
Aves	Charadriiformes	Scolopacidae	Gallinago	Gallinago_gallinago	Common Snipe	2			Least Concern	Decreasing	Summer migrant	March-November	Forest, Grassland, Wetlands (inland), Marine Neritic, Artificial/Aquatic & Marine
Aves	Charadriiformes	Scolopacidae	Numenius	Numenius_sp.		1
Aves	Columbiformes	Columbidae	Columba	Columba_livia	Rock Dove	4		1	Least Concern	Decreasing	Resident (Introduced)	Year around	Rocky areas (eg. inland cliffs, mountain peaks), Caves and Subterranean Habitats (non-aquatic), Artificial/Terrestrial
Aves	Columbiformes	Columbidae	Columba	Columba_oenas	Stock Dove		5		Least Concern	Increasing	Passage migrant	March-April and August-October	Forest, Shrubland, Rocky areas (eg. inland cliffs, mountain peaks), Caves and Subterranean Habitats (non-aquatic), Artificial/Terrestrial
Aves	Columbiformes	Columbidae	Columba	Columba_palumbus	Common Woodpigeon	23	13	12	Least Concern	Increasing	Resident	Year around	Forest, Shrubland, Artificial/Terrestrial
Aves	Columbiformes	Columbidae	Streptopelia	Streptopelia_decaocto	Eurasian Collared-dove	2			Least Concern	Increasing	Resident	Year around	Shrubland, Artificial/Terrestrial
Aves	Galliformes	Phasianidae	Phasianus	Phasianus_colchicus	Common Pheasant	33	23	7	Least Concern	Decreasing	Resident (Introduced)	Year around	Forest, Shrubland, Artificial/Terrestrial
Aves	Gruiformes	Gruidae	Grus	Grus_grus	Common Crane	8			Least Concern	Increasing	Passage migrant	March-April and August-October	Savanna, Grassland, Wetlands (inland), Marine Intertidal, Artificial/Terrestrial, Artificial/Aquatic & Marine
Aves	Gruiformes	Ralidae	Rallus	Rallus sp. (Potentially Rallus aquaticus)	Western Water Rail		2		Least Concern	Decreasing	Resident	Year around	Grassland, Wetlands (inland), Artificial/Aquatic & Marine
Aves	Passeriformes	Alaudidae	Alauda	Alauda_gulgula (potentially Alauda arvensis)	Eurasian Skylark			16	Least Concern	Decreasing	Resident	Year around	Shrubland, Grassland, Wetlands (inland), Marine Intertidal, Marine Coastal/Supratidal, Artificial/Terrestrial
Aves	Passeriformes	Certhidae	Certhia	Certhia_brachydactyla	Short-toed Treecreeper		1	10	Least Concern	Increasing	Resident	Year around	Forest, Shrubland, Artificial/Terrestrial	Not found near Kalvebodefællede
Aves	Passeriformes	Corvidae	Corvus	Corvus_sp.		3	9	8
Aves	Passeriformes	Corvidae	Garrulus	Garrulus_glandarius	Eurasian Jay		1		Least Concern	Stable	Resident	Year around	Forest, Artificial/Terrestrial
Aves	Passeriformes	Corvidae	Pica	Pica_pica	Eurasian Magpie		3		Least Concern	Stable	Resident	Year around	Forest, Shrubland, Grassland, Rocky areas (eg. inland cliffs, mountain peaks), Artificial/Terrestrial
Aves	Passeriformes	Emberizidae	Emberiza	Emberiza_schoeniclus	Reed Bunting		7		Least Concern	Decreasing	Summer migrant	April-October	Wetlands (inland), Artificial/Terrestrial
Aves	Passeriformes	Fringillidae	Chloris	Chloris_chloris	European Greenfinch	2	1		Least Concern	Stable	Resident	Year around	Forest, Shrubland, Artificial/Terrestrial
Aves	Passeriformes	Fringillidae	Fringilla	Fringilla_coelebs	Common Chaffinch	4	5	8	Least Concern	Increasing	Resident	Year around	Forest, Shrubland, Artificial/Terrestrial
Aves	Passeriformes	Fringillidae	N/A	N/A		3
Aves	Passeriformes	Fringillidae	Pyrrhula	Pyrrhula_pyrrhula	Eurasian Bullfinch			21	Least Concern	Decreasing	Resident	Year around	Forest, Shrubland, Artificial/Terrestrial
Aves	Passeriformes	Hirundinidae	Delichon	Delichon_urbicum	Northern House Martin			1	Least Concern	Decreasing	Summer migrant	April-October	Forest, Savanna, Grassland, Rocky areas (eg. inland cliffs, mountain peaks), Artificial/Terrestrial
Aves	Passeriformes	Hirundinidae	Hirundo	Hirundo_rustica	Barn Swallow		2		Least Concern	Decreasing	Summer migrant	April-October	Savanna, Shrubland, Grassland, Wetlands (inland), Artificial/Terrestrial, Artificial/Aquatic & Marine
Aves	Passeriformes	Muscicapidae	Erithacus	Erithacus_rubecula	European Robin		8	22	Least Concern	Increasing	Resident	Year around	Forest, Shrubland, Grassland, Artificial/Terrestrial
Aves	Passeriformes	Muscicapidae	Muscicapa	Muscicapa_striata	Spotted Flycatcher		1		Least Concern	Decreasing	Summer migrant	May-September	Forest, Savanna, Shrubland, Artificial/Terrestrial
Aves	Passeriformes	Panuridae	Panurus	Panurus_biarmicus	Bearded Reedling	2			Least Concern	Unknown	Resident	Year around	Wetlands (inland)
Aves	Passeriformes	Paridae	Cyanistes	Cyanistes_spp.				19
Aves	Passeriformes	Paridae	Parus	Parus_major	Great Tit	5	20	40	Least Concern	Increasing	Resident	Year around	Forest, Shrubland, Grassland, Desert, Artificial/Terrestrial
Aves	Passeriformes	Paridae	Poecile	Poecile_sp.		1		1
Aves	Passeriformes	Passeridae	Passer	Passer_montanus	Eurasian Tree Sparrow		12	14	Least Concern	Decreasing	Resident	Year around	Forest, Shrubland, Artificial/Terrestrial
Aves	Passeriformes	Passeridae	Passer	Passer_sp.		5
Aves	Passeriformes	Phylloscopidae	Phylloscopus	Phylloscopus_collybita	Common Chiffchaff		5	29	Least Concern	Increasing	Summer migrant	March-October	Forest, Savanna, Shrubland, Wetlands (inland), Artificial/Terrestrial
Aves	Passeriformes	Prunellidae	Prunella	Prunella_modularis	Dunnock		1	2	Least Concern	Decreasing	Resident	Year around	Forest, Shrubland, Artificial/Terrestrial
Aves	Passeriformes	Prunellidae	Prunella	Prunella_sp.			1
Aves	Passeriformes	Regulidae	Regulus	Regulus_regulus	Goldcrest			5	Least Concern	Decreasing	Resident	Year around	Forest, Artificial/Terrestrial
Aves	Passeriformes	Sittidae	Sitta	Sitta_europaea	Eurasian Nuthatch	1		8	Least Concern	Stable	Resident	Year around	Forest
Aves	Passeriformes	Sturnidae	Sturnus	Sturnus_vulgaris	Common Starling		2	2	Least Concern	Decreasing	Summer migrant	March-November	Forest, Shrubland, Grassland, Marine Intertidal, Artificial/Terrestrial, Artificial/Aquatic & Marine
Aves	Passeriformes	Sylviidae	Sylvia	Sylvia_atricapilla	Eurasian Blackcap		4	3	Least Concern	Increasing	Summer migrant	April-October	Forest, Savanna, Shrubland, Artificial/Terrestrial
Aves	Passeriformes	Sylviidae	Sylvia	Sylvia_borin	Garden Warbler		1		Least Concern	Decreasing	Summer migrant	May-September	Forest, Savanna, Shrubland, Artificial/Terrestrial
Aves	Passeriformes	Sylviidae	Sylvia	Sylvia_spp.			3	1	Least Concern	Increasing	Resident	Year around	Forest, Shrubland, Artificial/Terrestrial
Aves	Passeriformes	Troglodytidae	Troglodytes	Troglodytes troglodytes	Northern Wren		21	45
Aves	Passeriformes	Troglodytidae	Troglodytes	Troglodytes_spp.				0
Aves	Passeriformes	Turdidae	Turdus	Turdus_merula	Eurasian Blackbird	7	25	26	Least Concern	Increasing	Resident	Year around	Forest, Shrubland, Grassland, Artificial/Terrestrial
Aves	Passeriformes	Turdidae	Turdus	Turdus_philomelos	Song Thrush	3			Least Concern	Increasing	Summer migrant	March-September	Forest, Shrubland, Artificial/Terrestrial
Aves	Pelecaniformes	Ardeidae	Ardea	Ardea_cinerea	Grey Heron	11	24	3	Least Concern	Unknown	Resident	Year around	Forest, Grassland, Wetlands (inland), Marine Neritic, Marine Intertidal, Artificial/Aquatic & Marine
Aves	Piciformes	Picidae	Dendrocopos	Dendrocopos_major	Great Spotted Woodpecker			12	Least Concern	Increasing	Resident	Year around	Forest, Artificial/Terrestrial
Aves	Piciformes	Picidae	Picus	Picus_viridis	Eurasian Green Woodpecker			2	Least Concern	Increasing	Resident	Year around	Forest, Shrubland, Artificial/Terrestrial
Aves	Strigiformes	Strigidae	Asio	Asio_otus	Northern Long-eared Owl		3		Least Concern	Decreasing	Resident	Year around	Forest, Shrubland, Grassland, Wetlands (inland), Artificial/Terrestrial
Aves	Strigiformes	Strigidae	Strix	Strix_aluco	Tawny Owl			8	Least Concern	Stable	Resident	Year around	Forest, Shrubland, Artificial/Terrestrial
Aves	Suliformes	Phalacrocoracidae	Phalacrocorax	Phalacrocorax_carbo	Great Cormorant	37	24	27	Least Concern	Increasing	Resident	Year around	Forest, Wetlands (inland), Marine Neritic, Marine Coastal/Supratidal
Aves	Suliformes	Sulidae	Morus	Morus_spp.				1
Mammalia	Artiodactyla	Bovidae	Bison	Bison_bonasus	European Bison			4	Near Threatened	Increasing	Resident (Introduced)	Year around	Forest, Shrubland, Grassland, Artificial/Terrestrial
Mammalia	Artiodactyla	Bovidae	Ovis	Ovis_sp.	Potentially Muflon		5
Mammalia	Artiodactyla	Cervidae	Capreolus	Capreolus_capreolus	European Roe Deer	1			Least Concern	Increasing	Resident	Year around	Forest, Shrubland, Grassland, Wetlands (inland), Artificial/Terrestrial
Mammalia	Artiodactyla	Cervidae	Cervus	Cervus_elaphus	Red Deer	2		12	Least Concern	Increasing	Resident	Year around	Forest, Shrubland, Grassland, Rocky areas (eg. inland cliffs, mountain peaks), Artificial/Terrestrial
Mammalia	Artiodactyla	Cervidae	Dama	Dama_dama	Common Fallow Deer		5		Least Concern	Increasing	Resident (Introduced)	Year around	Forest, Shrubland, Grassland, Artificial/Terrestrial
Mammalia	Carnivora	Canidae	Vulpes	Vulpes_vulpes	Red Fox	5	1		Least Concern	Stable	Resident	Year around	Forest, Shrubland, Grassland, Wetlands (inland), Desert, Artificial/Terrestrial
Mammalia	Chiroptera	Vespertilionidae	Pipistrellus	Pipistrellus_pygmaeus	Soprano Pipistrelle		2	2	Least Concern	Unknown	Resident	Summer active	Forest, Wetlands (inland), Artificial/Terrestrial	Only in western part of Denmark
Mammalia	Eulipotyphla	Erinaceidae	Erinaceus	Erinaceus_europaeus	Western European Hedgehog		3	2	Least Concern	Stable	Resident	April-October	Forest, Grassland, Artificial/Terrestrial
Mammalia	Eulipotyphla	Soricidae	Sorex	Sorex_araneus	Common shrew			1	Least Concern	Stable	Resident	Year around	Forest, Shrubland, Wetlands (inland), Marine Coastal/Supratidal, Artificial/Terrestrial
Mammalia	Lagomorpha	Leporidae	Lepus	Lepus_europaeus	European Hare	2	1		Least Concern	Decreasing	Resident	Year around	Shrubland, Grassland, Artificial/Terrestrial
Mammalia	Lagomorpha	Leporidae	Oryctolagus	Oryctolagus_cuniculus	European Rabbit	1			Endangered	Decreasing	Resident (Introduced)	Year around	Forest, Savanna, Shrubland, Grassland, Artificial/Terrestrial
Mammalia	Rodentia	Cricetidae	Microtus	Microtus_agrestis	Short-tailed field vole	9	13	5	Least Concern	Stable	Resident	Year around	Forest, Shrubland, Grassland, Wetlands (inland), Artificial/Terrestrial
Mammalia	Rodentia	Cricetidae	Microtus	Microtus_arvalis	Common Vole			1	Least Concern	Stable	Resident	Year around	Forest, Shrubland, Grassland, Artificial/Terrestrial
Mammalia	Rodentia	Cricetidae	Myodes	Myodes_glareolus	Bank Vole	4	4	26	Least Concern	Stable	Resident	Year around	Forest, Shrubland
Mammalia	Rodentia	Muridae	Apodemus	Apodemus_flavicollis	Yellow-necked Field Mouse	1	1	5	Least Concern	Stable	Resident	Year around	Forest, Shrubland
Mammalia	Rodentia	Muridae	Apodemus	Apodemus_sylvaticus	Long-tailed Field Mouse	4		1	Least Concern	Stable	Resident	Year around	Forest, Shrubland, Grassland, Marine Coastal/Supratidal, Artificial/Terrestrial
Mammalia	Rodentia	Muridae	Micromys	Micromys_minutus	Eurasian Harvest Mouse	1			Least Concern	Stable	Resident	Year around	Forest, Shrubland, Grassland, Wetlands (inland), Artificial/Terrestrial, Artificial/Aquatic & Marine
Mammalia	Rodentia	Muridae	Mus	Mus_musculus	House Mouse		29		Least Concern	Stable	Resident	Year around	Shrubland, Grassland, Wetlands (inland), Marine Coastal/Supratidal, Artificial/Terrestrial
Mammalia	Rodentia	Muridae	Mus	Mus_spp.				1
Mammalia	Rodentia	Muridae	Rattus	Rattus_norvegicus	Brown Rat		1		Least Concern	Stable	Resident	Year around	Artificial/Terrestrial
Mammalia	Rodentia	Muridae	Rattus	Rattus_sp.		2
Mammalia	Rodentia	Muridae	Rattus	Rattus_sp.		2
Mammalia	Rodentia	Sciuridae	Sciurus	Sciurus_sp.			2
Mammalia	Rodentia	Sciuridae	Sciurus	Sciurus_vulgaris	Eurasian Red Squirrel	11		4	Least Concern	Unknown	Resident	Year around	Forest, Artificial/Terrestrial
Amphibia	Anura	Bufonidae	Bufo	Bufo_bufo	Common Toad		16	21	Least Concern	Decreasing	Resident	Spring to Autumn	Forest, Shrubland, Grassland, Wetlands (inland), Artificial/Terrestrial, Artificial/Aquatic & Marine

## Sheet: Kalvebodefællede taxa (Exp1)
					Extraction ID	F15	F24	F55	F77	F79	F82	F47	F5	F62	F76	F80	F84	F1	F10	F16	F18	F2	F63	F14	F20	F53	F59	F7	F73	F17	F31	F39	F74	F83	F23	F41	F44	F46	F48	F60	F3	F30	F32	F57	F68	F69	F42	F43	F50
					Filter_Type	M6																		F7_LF																	F7_FB
					Date	D1						D2						D3						D1						D2					D3						D1						D2
Taxa	Class	Order	Family	Genus	Species	S11_D1	S15_D1	S13_D1	S1_D1	S28_D1	S5_D1	S24_D2	S9_D2	S16_D2	S13_D2	S19_D2	S4_D2	S22_D3	S27_D3	S21_D3	S18_D3	S16_D3	S3_D3	S25_D1	S16_D1	S4_D1	S6_D1	S22_D1	S20_D1	S21_D2	S2_D2	S18_D2	S11_D2	S27_D2	S12_D3	S13_D3	S25_D3	S15_D3	S7_D3	S9_D3	S26_D1	S14_D1	S23_D1	S27_D1	S21_D1	S3_D1	S20_D2	S6_D2	S12_D2
Taxa5	Aves	Galliformes	Phasianidae	Phasianus	Phasianus_colchicus	1	1	0	1	1	1	0	0	1	0	0	1	1	1	1	1	1	1	1	0	1	1	0	0	0	0	0	0	0	1	0	1	1	0	1	1	0	1	0	1	0	0	0	0
Taxa6	Aves	Anseriformes	Anatidae	Anas	Anas_crecca	1	1	1	1	1	1	1	1	1	1	1	1	1	1	1	1	1	1	0	0	0	1	1	0	0	1	1	1	0	0	0	0	0	0	0	1	1	0	1	1	1	1	1	1
Taxa13	Aves	Anseriformes	Anatidae	Anas	Anas_platyrhynchos	1	0	1	1	1	1	1	1	1	1	1	1	1	1	1	1	0	0	0	0	0	1	0	0	0	0	1	1	0	0	0	0	0	0	0	0	1	0	0	0	1	1	1	1
Taxa2	Aves	Anseriformes	Anatidae	Branta	Branta_sp. (Possibly Branta_leucopsis)	1	1	1	1	1	1	1	1	1	1	1	1	1	1	1	1	1	1	1	1	1	1	1	1	1	1	1	1	1	1	0	0	1	1	1	1	1	1	1	1	1	1	1	1
Taxa31	Aves	Anseriformes	Anatidae	Aythya	Aythya_sp.	0	0	0	0	0	0	0	0	1	1	0	0	0	0	0	0	0	0	0	0	0	0	0	0	0	0	0	0	0	0	0	0	0	0	0	0	0	0	0	0	0	0	0	0
Taxa33	Aves	Anseriformes	Anatidae	Melanitta	Melanitta_sp.	0	0	0	0	0	0	0	0	1	0	0	0	0	0	1	0	0	0	0	0	0	0	0	0	0	0	0	0	0	0	0	0	0	0	0	0	0	0	0	0	0	0	0	0
Taxa34	Aves	Charadriiformes	Scolopacidae	Gallinago	Gallinago_gallinago	0	0	0	0	0	1	0	0	0	1	0	0	0	0	0	0	0	0	0	0	0	0	0	0	0	0	0	0	0	0	0	0	0	0	0	0	0	0	0	0	0	0	0	0
Taxa29	Aves	Charadriiformes	Scolopacidae	Numenius	Numenius_sp.	0	0	0	0	0	0	0	0	0	0	0	0	0	0	0	0	0	0	0	0	0	0	0	0	0	0	0	0	0	0	0	0	0	0	0	0	0	0	0	0	0	0	0	0
Taxa4	Aves	Charadriiformes	Charadriidae	Pluvialis	Pluvialis_apricaria	1	1	0	1	1	1	0	0	0	0	0	0	1	1	1	1	1	1	0	1	1	1	1	0	0	0	0	0	0	1	1	0	1	0	0	0	1	1	0	0	1	0	0	0
Taxa36	Aves	Charadriiformes	Charadriidae	Vanellus	Vanellus_vanellus	0	0	0	0	0	0	0	0	0	0	0	0	0	0	0	0	0	0	0	0	0	0	0	0	0	0	0	0	0	0	0	0	0	0	1	0	0	0	0	0	0	0	0	0
Taxa12	Aves	Charadriiformes	Laridae	Larus	Larus_sp.	1	1	1	0	0	1	1	1	1	1	1	1	1	1	0	0	1	0	0	0	0	0	0	0	0	1	1	1	1	0	0	0	0	0	0	0	0	0	0	1	0	1	0	1
Taxa21	Aves	Charadriiformes	Laridae	Chroicocephalus	Chroicocephalus_ridibundus	0	1	0	0	0	1	0	0	0	0	0	0	1	1	0	0	1	0	0	0	0	0	0	0	0	0	0	0	0	0	0	0	0	0	0	0	0	0	0	0	0	0	0	0
Taxa19	Aves	Gruiformes	Gruidae	Grus	Grus_grus	0	0	0	0	0	0	1	0	1	1	0	1	0	0	0	0	0	0	0	0	0	0	0	0	0	1	0	0	0	0	0	0	0	0	0	0	0	0	0	0	0	0	0	0
Taxa16	Aves	Pelecaniformes	Ardeidae	Ardea	Ardea_cinerea	0	0	0	1	0	0	1	0	0	0	0	1	0	0	1	0	0	0	0	0	0	0	0	1	0	0	0	0	0	0	1	0	0	0	0	0	0	1	1	1	0	0	0	1
Taxa9	Aves	Suliformes	Phalacrocoracidae	Phalacrocorax	Phalacrocorax_carbo	1	1	1	1	0	1	1	1	1	1	0	0	1	1	1	1	1	1	1	1	0	0	0	0	0	1	1	0	0	1	1	1	1	1	1	0	0	0	1	0	0	0	0	0
Taxa22	Aves	Columbiformes	Columbidae	Columba	Columba_livia	0	0	0	0	0	0	0	1	0	0	0	1	0	0	0	0	0	0	0	0	0	0	0	0	0	1	0	0	0	0	0	0	0	0	0	0	0	0	0	0	0	0	0	0
Taxa11	Aves	Columbiformes	Columbidae	Columba	Columba_palumbus	1	1	0	1	1	1	0	0	0	0	0	1	1	1	1	1	0	0	0	0	0	0	0	0	0	0	0	0	0	1	1	1	0	1	0	1	0	0	0	0	1	0	0	0
Taxa28	Aves	Columbiformes	Columbidae	Streptopelia	Streptopelia_decaocto	0	0	0	0	0	0	0	0	0	0	0	0	0	0	0	0	0	0	0	0	0	0	0	0	0	0	0	0	0	0	0	0	0	0	0	0	0	0	0	0	0	1	0	0
Taxa24	Aves	Accipitriformes	Accipitridae	Accipiter	Accipiter_nisus	0	0	0	0	0	0	0	0	0	0	0	0	0	0	0	0	0	0	0	0	0	0	0	0	0	0	0	0	0	0	0	0	0	0	0	0	0	0	0	0	0	0	0	0
Taxa44	Aves	Accipitriformes	Accipitridae	Buteo	Buteo_buteo	0	0	0	0	1	1	0	0	0	0	0	0	0	0	0	0	0	0	0	0	0	0	0	0	0	0	0	0	0	0	0	0	0	0	0	0	0	0	0	0	0	0	0	0
Taxa35	Aves	Passeriformes	Corvidae	Corvus	Corvus_sp.	0	0	0	0	0	0	0	0	0	0	0	0	0	0	0	0	0	0	0	0	0	0	0	0	0	0	0	0	0	0	0	0	0	0	0	0	0	0	0	0	0	1	0	0
Taxa45	Aves	Passeriformes	Corvidae	Corvus	Corvus_sp.	0	0	0	0	0	0	0	0	0	0	0	0	0	0	0	0	0	0	0	0	0	0	0	0	0	0	0	0	0	0	0	0	0	0	0	0	0	0	0	0	0	1	0	0
Taxa35	Aves	Passeriformes	Fringillidae	Chloris	Chloris_chloris	0	0	0	0	0	0	0	0	0	0	0	0	0	1	0	0	0	0	0	0	0	0	0	0	0	0	0	0	0	0	0	0	0	0	0	0	0	0	0	0	0	0	0	0
Taxa20	Aves	Passeriformes	Fringillidae	Fringilla	Fringilla_coelebs	1	0	0	0	1	1	0	0	0	0	0	0	0	1	0	0	0	0	0	0	0	0	0	0	0	0	0	0	0	0	0	0	0	0	0	0	0	0	0	0	0	0	0	0
Taxa23	Aves	Passeriformes	Fringillidae	N/A	N/A	0	1	0	0	0	0	0	0	0	0	0	0	0	1	0	0	0	0	0	0	0	0	0	0	0	0	0	0	0	0	0	0	0	0	0	0	0	0	0	0	0	0	0	0
Taxa15	Aves	Passeriformes	Paridae	Parus	Parus_major	0	1	0	0	0	0	1	0	0	0	0	0	1	0	0	0	0	0	0	0	0	0	0	1	0	0	0	0	0	0	0	0	0	0	0	0	0	0	0	0	0	1	0	0
Taxa39	Aves	Passeriformes	Paridae	Poecile	Poecile_sp.	0	0	0	0	0	0	1	0	0	0	0	0	0	0	0	0	0	0	0	0	0	0	0	0	0	0	0	0	0	0	0	0	0	0	0	0	0	0	0	0	0	0	0	0
Taxa43	Aves	Passeriformes	Sittidae	Sitta	Sitta_europaea	0	0	0	0	0	0	0	0	0	1	0	0	0	0	0	0	0	0	0	0	0	0	0	0	0	0	0	0	0	0	0	0	0	0	0	0	0	0	0	0	0	0	0	0
Taxa14	Aves	Passeriformes	Turdidae	Turdus	Turdus_merula	0	1	0	0	0	0	0	0	0	1	0	0	0	0	0	0	1	0	0	0	0	0	0	0	0	1	0	0	0	0	0	0	0	0	0	0	0	0	0	0	0	0	0	0
Taxa25	Aves	Passeriformes	Turdidae	Turdus	Turdus_philomelos	0	0	0	0	0	0	0	0	0	1	0	0	0	0	0	0	1	0	0	0	0	0	0	0	0	0	0	0	0	0	0	0	0	0	0	0	0	0	0	0	0	0	0	0
Taxa27	Aves	Passeriformes	Panuridae	Panurus	Panurus_biarmicus	0	0	0	0	0	0	0	0	0	0	0	0	0	0	0	0	0	0	0	0	0	1	0	0	0	0	0	0	0	0	0	0	0	0	0	0	0	0	0	0	0	0	0	0
Taxa17	Aves	Passeriformes	Passeridae	Passer	Passer_sp.	0	0	0	1	0	0	0	0	0	0	0	0	0	0	0	0	0	0	0	0	0	0	0	0	0	0	0	0	0	0	0	0	0	0	0	0	0	0	1	0	0	1	0	0
Taxa20	Mammalia	Rodentia	Muridae	Apodemus	Apodemus_flavicollis	0	0	0	0	0	0	0	0	0			0		0	1		0	0					0			0		0		0	0	0			0
Taxa14	Mammalia	Rodentia	Muridae	Apodemus	Apodemus_sylvaticus	0	0	0	0	0	0	1	0	0			0		1	1		0	0					0			0		0		0	0	0			0
Taxa15	Mammalia	Rodentia	Muridae	Micromys	Micromys_minutus	0	0	0	1	0	0	0	0	0			0		0	0		0	0					0			0		0		0	0	0			0
Taxa23	Mammalia	Rodentia	Muridae	Rattus	Rattus_sp.	1	1	0	0	0	0	0	0	0			0		0	0		0	0					0			0		0		0	0	0			0
Taxa24	Mammalia	Rodentia	Muridae	Rattus	Rattus_sp.	1	1	0	0	0	0	0	0	0			0		0	0		0	0					0			0		0		0	0	0			0
Taxa6	Mammalia	Rodentia	Cricetidae	Microtus	Microtus_agrestis	0	0	0	0	0	1	1	0	1			0		0	1		0	1					0			0		0		0	0	1			0
Taxa8	Mammalia	Rodentia	Cricetidae	Microtus	Microtus_arvalis	1	0	1	0	1	0	0	1	0			0		0	0		0	0					0			1		0		0	1	0			0
Taxa12	Mammalia	Rodentia	Cricetidae	Myodes	Myodes_glareolus	0	0	0	0	0	0	1	0	0			0		0	0		0	0					0			0		1		1	0	0			1
Taxa9	Mammalia	Rodentia	Sciuridae	Sciurus	Sciurus_vulgaris	0	0	0	0	0	1	1	1	1			0		0	1		0	1					0			0		0		0	0	1			0
Taxa35	Mammalia	Lagomorpha	Leporidae	Oryctolagus	Oryctolagus_cuniculus	0	0	0	0	0	0	0	0	0			0		0	0		0	0					1			0		0		0	0	0			0
Taxa16	Mammalia	Lagomorpha	Leporidae	Lepus	Lepus_europaeus	0	0	0	0	0	0	0	0	0			0		0	0		1	0					0			0		0		0	0	0			0
Taxa18	Mammalia	Artiodactyla	Cervidae	Capreolus	Capreolus_capreolus	0	0	0	0	0	0	0	0	0			0		0	0		0	0					0			0		0		0	0	0			0
Taxa26	Mammalia	Artiodactyla	Cervidae	Cervus	Cervus_elaphus	0	0	0	0	0	0	0	0	0			0		0	1		0	0					0			0		0		0	0	0			0
Taxa35	Mammalia	Carnivora	Canidae	Vulpes	Vulpes_vulpes	0	0	1	0	0	0	0	0	0			1		0	0		0	0					0			0		0		0	0	0			0
[truncated: 26 more columns]

## Sheet: Æbelø taxa (Exp2)
					Location	A1			A2			A3			A4			A5			A6			A7			A8			A9			A10			A11			A12			A13			A14			A15
					Sample type	Frozen	LB	Buffer	Frozen	LB	Buffer	Frozen	LB	Buffer	Frozen	LB	Buffer	Frozen	LB	Buffer	Frozen	LB	Buffer	Frozen	LB	Buffer	Frozen	LB	Buffer	Frozen	LB	Buffer	Frozen	LB	Buffer	Frozen	LB	Buffer	Frozen	LB	Buffer	Frozen	LB	Buffer	Frozen	LB	Buffer	Frozen	LB
OTU	Class	Order	Family	Genus	Species	A1_D	A1_W	A1_B	A2_D	A2_W	A2_B	A3_D	A3_W	A3_B	A4_D	A4_W	A4_B	A5_D	A5_W	A5_B	A6_D	A6_W	A6_B	A7_D	A7_W	A7_B	A8_D	A8_W	A8_B	A9_D	A9_W	A9_B	A10_D	A10_W	A10_B	A11_D	A11_W	A11_B	A12_D	A12_W	A12_B	A13_D	A13_W	A13_B	A14_D	A14_W	A14_B	A15_D	A15_W
Taxa7	Aves	Galliformes	Phasianidae	Phasianus	Phasianus_colchicus	1	1	0	1	0		0	0		1	1	0	1	0	0	0	0		1	0	0	1	1	1	1	0		1		0	1	0		1	1		1	0		1	1		1	0
Taxa20	Aves	Anseriformes	Anatidae	Anas	Anas_platyrhynchos	1	0	0	1	0		0	0		1	1	0	0	0	0	0	1		0	0	0	0	0	0	1	0		0		0	0	0		0	0		1	0		0	0		0	0
Taxa9	Aves	Anseriformes	Anatidae	Somateria	Somateria_mollissima	1	0	0	1	1		1	1		1	1	0	1	0	0	1	0		1	0	0	1	0	0	1	0		1		1	1	0		1	1		1	1		1	1		1	1
Taxa11	Aves	Anseriformes	Anatidae	Anser	Anser_anser	1	0	0	1	1		1	0		1	0	0	1	0	0	0	0		1	0	0	1	0	0	0	1		1		0	1	0		0	0		1	0		1	1		1	1
Taxa19	Aves	Charadriiformes	Laridae	Chroicocephalus	Chroicocephalus_ridibundus	0	0	0	1	0		1	1		1	1	0	1	0	0	0	0		1	0	0	1	0	0	0	0		0		0	0	0		0	0		0	0		1	1		0	1
Taxa27	Aves	Charadriiformes	Charadriidae	Pluvialis	Pluvialis_apricaria	0	0	0	0	0		0	0		0	0	0	0	0	0	1	0		0	1	0	0	0	0	0	0		0		0	0	0		0	0		0	0		1	0		0	0
Taxa31	Aves	Gruiformes	Ralidae	Rallus	Rallus sp. (Potentially Rallus aquaticus)	0	1	0	0	0		1	0		0	0	0	0	0	0	0	0		0	0	0	0	0	0	0	0		0		0	0	0		0	0		0	0		0	0		0	0
Taxa10	Aves	Pelecaniformes	Ardeidae	Ardea	Ardea_cinerea	1	0	1	1	0		1	1		1	1	0	1	1	0	1	0		0	1	1	0	0	0	0	0		0		0	0	0		1	1		1	1		1	0		1	1
Taxa4	Aves	Suliformes	Phalacrocoracidae	Phalacrocorax	Phalacrocorax_carbo	1	1	1	1	1		1	1		1	1	1	1	1	1	0	1		1	1	0	0	0	0	1	0		0		0	0	0		0	0		0	0		1	0		1	0
Taxa21	Aves	Columbiformes	Columbidae	Columba	Columba_oenas	1	0	0	0	0		0	0		0	0	0	1	0	0	0	0		0	0	0	0	1	0	0	0		0		0	0	0		0	0		0	0		0	0		0	0
Taxa2	Aves	Columbiformes	Columbidae	Columba	Columba_palumbus	0	1	0	1	0		0	1		0	0	0	0	0	0	0	0		1	0	0	0	0	0	0	0		1		0	0	0		1	1		0	0		1	0		0	0
Taxa13	Aves	Accipitriformes	Accipitridae	Buteo	Buteo_buteo	1	0	0	1	1		1	1		0	0	0	1	0	0	0	0		1	0	0	0	1	0	0	0		1		0	1	1		0	0		0	0		0	0		1	0
Taxa29	Aves	Accipitriformes	Accipitridae	Haliaeetus	Haliaeetus_albicilla	0	0	0	0	0		0	0		0	0	0	0	0	0	0	0		0	0	0	0	0	0	0	0		0		0	0	0		0	0		0	0		0	0		1	0
Taxa26	Aves	Strigiformes	Strigidae	Asio	Asio_otus	1	1	0	0	0		0	0		0	0	0	0	0	0	0	0		0	0	0	0	0	0	0	0		0		0	0	0		0	0		0	0		0	0		0	0
Taxa34	Aves	Passeriformes	Hirundinidae	Hirundo	Hirundo_rustica	1	0	0	0	0		0	0		1	0	0	0	0	0	0	0		0	0	0	0	0	0	0	0		0		0	0	0		0	0		0	0		0	0		0	0
Taxa16	Aves	Passeriformes	Corvidae	Corvus	Corvus_sp.	0	1	0	1	0		1	0		1	0	0	0	0	0	0	0		1	0	0	1	0	0	0	0		0		0	0	0		0	0		0	0		0	0		1	0
Taxa5	Aves	Passeriformes	Corvidae	Pica	Pica_pica	0	0	0	0	0		0	0		0	1	1	0	0	0	0	0		1	0	0	0	0	0	0	0		0		0	0	0		0	0		0	0		0	0		0	0
Taxa38	Aves	Passeriformes	Corvidae	Garrulus	Garrulus_glandarius	1	0	0	0	0		0	0		0	0	0	0	0	0	0	0		0	0	0	0	0	0	0	0		0		0	0	0		0	0		0	0		0	0		0	0
Taxa22	Aves	Passeriformes	Muscicapidae	Erithacus	Erithacus_rubecula	1	0	0	1	1		1	0		1	0	0	0	1	0	0	0		0	0	0	0	0	0	0	0		0		0	0	0		0	0		1	0		1	0		0	0
Taxa36	Aves	Passeriformes	Muscicapidae	Muscicapa	Muscicapa_striata	0	0	0	0	0		0	0		0	0	0	0	0	0	0	0		0	0	0	0	0	0	0	0		0		0	0	0		0	0		1	0		0	0		0	0
Taxa23	Aves	Passeriformes	Sylviidae	Sylvia	Sylvia_atricapilla	1	0	0	0	1		0	0		0	0	0	0	1	0	0	0		0	0	0	0	0	0	0	0		0		0	0	0		0	0		0	0		0	0		1	0
Taxa25	Aves	Passeriformes	Sylviidae	Sylvia	Sylvia_borin	0	0	0	1	0		0	0		0	0	0	0	0	0	0	0		0	0	0	0	0	0	0	0		0		0	0	0		0	0		0	0		0	0		0	0
Taxa32	Aves	Passeriformes	Sylviidae	Sylvia	Sylvia_spp.	0	0	0	0	0		1	1		0	0	0	0	0	0	0	0		0	0	0	0	0	0	0	0		1		0	0	0		0	0		0	0		0	0		0	0
Taxa15	Aves	Passeriformes	Phylloscopidae	Phylloscopus	Phylloscopus_collybita	0	0	0	0	0		0	0		0	0	0	0	0	0	0	1		1	0	0	0	0	0	1	0		0		0	0	0		1	0		0	0		1	0		0	0
Taxa37	Aves	Passeriformes	Certhidae	Certhia	Certhia_brachydactyla	0	0	0	0	0		0	0		0	0	0	0	0	0	0	0		0	0	0	0	0	0	0	0		0		0	0	0		0	0		0	0		0	0		0	0
Taxa30	Aves	Passeriformes	Prunellidae	Prunella	Prunella_modularis	0	0	0	0	0		0	1		0	0	0	0	0	0	0	0		0	0	0	0	0	0	0	0		0		0	0	0		0	0		0	0		0	0		0	0
Taxa42	Aves	Passeriformes	Prunellidae	Prunella	Prunella_sp.	0	0	0	0	0		0	1		0	0	0	0	0	0	0	0		0	0	0	0	0	0	0	0		0		0	0	0		0	0		0	0		0	0		0	0
Taxa35	Aves	Passeriformes	Sturnidae	Sturnus	Sturnus_vulgaris	0	0	0	0	0		0	1		0	0	0	0	0	0	0	0		0	0	0	0	0	0	0	0		0		0	0	0		0	0		0	0		0	0		0	0
Taxa8	Aves	Passeriformes	Troglodytidae	Troglodytes	Troglodytes troglodytes	1	0	0	1	1		0	0		1	0	0	1	0	0	0	0		1	1	0	0	0	0	1	0		0		0	1	1		1	0		1	1		1	0		1	1
Taxa6	Aves	Passeriformes	Turdidae	Turdus	Turdus_merula	1	1	0	1	0		0	0		1	1	1	1	1	0	0	0		1	0	0	1	0	1	1	1		1		0	1	1		1	1		1	0		1	0		0	0
Taxa12	Aves	Passeriformes	Paridae	Parus	Parus_major	1	1	0	1	0		1	0		1	1	0	0	1	0	0	1		1	0	0	0	0	0	1	0		1		0	0	0		1	0		1	0		1	0		1	0
Taxa40	Aves	Passeriformes	Fringillidae	Chloris	Chloris_chloris	0	0	0	0	0		0	0		0	0	0	0	0	0	0	0		0	0	0	0	0	0	0	0		0		0	0	0		0	0		0	0		1	0		0	0
Taxa14	Aves	Passeriformes	Fringillidae	Fringilla	Fringilla_coelebs	1	0	0	0	1		0	0		0	0	0	1	0	0	0	0		0	0	0	0	0	1	0	0		0		0	0	0		0	0		0	0		0	0		0	0
Taxa17	Aves	Passeriformes	Emberizidae	Emberiza	Emberiza_schoeniclus	0	0	0	0	0		0	0		1	0	0	1	0	0	0	0		0	0	0	1	0	0	0	0		0		0	0	0		0	0		0	0		0	0		1	0
Taxa24	Aves	Passeriformes	Passeridae	Passer	Passer_montanus	1	0	1	0	0		0	0		1	1	0	1	0	0	1	0		0	1	0	1	0	0	1	0		1		0	0	0		0	0		0	0		0	0		0	0
Taxa25	Mammalia	Rodentia	Muridae	Apodemus	Apodemus_flavicollis	0	0	0	0	0	0	0	0		0	0	0	0	0	0	1	0		0	0			0		0	0	0		0	0	0	0		0	0	0	0	0		0	0		0	0
Taxa3	Mammalia	Rodentia	Muridae	Mus	Mus_musculus	0	1	1	0	1	1	0	1		0	1	1	0	1	1	0	1		0	1			1		0	1	0		1	1	0	1		0	1	0	0	1		0	1		0	1
Taxa23	Mammalia	Rodentia	Muridae	Rattus	Rattus_norvegicus	0	0	0	0	0	0	0	0		0	0	0	0	0	0	0	0		0	0			0		0	0	0		0	0	0	0		1	0	0	0	0		0	0		0	0
Taxa11	Mammalia	Rodentia	Cricetidae	Myodes	Myodes_glareolus	1	0	0	0	1	0	1	0		0	0	0	0	0	0	0	0		0	0			0		0	0	0		0	0	0	0		0	0	0	0	0		0	0		0	0
Taxa7	Mammalia	Rodentia	Cricetidae	Microtus	Microtus_agrestis	1	0	0	1	1	0	0	0		0	0	0	1	0	0	0	0		0	0			0		0	0	0		0	0	0	0		1	0	0	1	0		0	0		1	1
Taxa21	Mammalia	Rodentia	Sciuridae	Sciurus	Sciurus_sp.	0	0	0	0	0	0	0	0		0	0	0	0	0	0	0	0		1	0			0		0	0	0		0	0	0	0		0	0	0	0	0		0	0		0	0
Taxa19	Mammalia	Chiroptera	Vespertilionidae	Eptesicus	Eptesicus_sp.	0	0	0	0	0	0	0	0		0	0	0	1	0	0	0	0		0	0			0		0	0	0		0	0	0	0		0	0	0	0	0		0	0		0	0
Taxa15	Mammalia	Chiroptera	Vespertilionidae	Pipistrellus	Pipistrellus_pygmaeus	0	0	0	0	0	0	0	0		1	0	0	0	0	0	0	0		1	0			0		0	0	0		0	0	0	0		0	0	0	0	0		0	0		0	0
Taxa20	Mammalia	Lagomorpha	Leporidae	Lepus	Lepus_europaeus	0	0	0	0	0	0	0	0		0	0	0	0	0	0	1	0		0	0			0		0	0	0		0	0	0	0		0	0	0	0	0		0	0		0	0
Taxa12	Mammalia	Eulipotyphla	Erinaceidae	Erinaceus	Erinaceus_europaeus	0	0	0	0	1	0	0	0		0	0	0	0	0	0	0	1		0	1			0		0	0	0		0	0	0	0		0	0	0	0	0		0	0		0	0
Taxa24	Mammalia	Artiodactyla	Cervidae	Dama	Dama_dama	0	0	0	0	0	0	0	0		0	0	0	0	0	0	0	0		0	0			1		0	1	1		0	0	0	0		0	0	0	0	0		0	0		0	0
Taxa8	Mammalia	Artiodactyla	Bovidae	Ovis	Ovis_sp.	0	0	0	0	1	0	0	0		1	0	0	0	0	0	0	0		0	0			0		1	0	0		0	0	1	0		0	0	0	0	0		0	1		0	0
Taxa18	Mammalia	Carnivora	Canidae	Vulpes	Vulpes_vulpes	0	0	0	0	0	0	0	0		0	0	0	0	0	0	0	0		0	0			0		0	0	0		0	0	0	0		0	0	0	1	0		0	0		0	0
Taxa9	Amphibia	Anura	Bufonidae	Bufo	Bufo_bufo	1	0	0	1	0	0	0	0		1	0	1	1	1	0	0	0		1	0			0		0	0	0		0	0	0	0		1	0	1	0	0		1	0		1	0
[truncated: 16 more columns]

## Sheet: Tofte Forest taxa (Exp3)
					SampleSite	A												B												C												D
					SampleType	12v			12v_5			5v			5v_12			12v			12v_5			5v			5v_12			12v			12v_5			5v			5v_12			12v			12v_5			5v
					Date	Day1	Day2	Day3	Day1	Day2	Day3	Day1	Day2	Day3	Day1	Day2	Day3	Day1	Day2	Day3	Day1	Day2	Day3	Day1	Day2	Day3	Day1	Day2	Day3	Day1	Day2	Day3	Day1	Day2	Day3	Day1	Day2	Day3	Day1	Day2	Day3	Day1	Day2	Day3	Day1	Day2	Day3	Day1	Day2
Taxa	Class	Order	Family	Genus	Species	AF31	AF137	AF48	AF51	AF43	AF81	AF120	AF111		AF144	AF87		AF151	AF130	AF2	AF78	AF62	AF95	AF135	AF21	AF79	AF15	AF76	AF92	AF49	AF181	AF166	AF27	AF124	AF104	AF174		AF29	AF156	AF34	AF73	AF20	AF143	AF90	AF177	AF14	AF82		AF179
Taxa22	Aves	Galliformes	Phasianidae	Phasianus	Phasianus_colchicus	0	1	0	0	0	0	0	0		0	0		0	0	0	0	0	0	0	0	0	0	0	0	0	0	0	0	0	0			0	0	0	0	0	0	0	0		0		0
Taxa21	Aves	Anseriformes	Anatidae	Melanitta	Melanitta_deglandi (Possibly Melanitta fusca two species were recently split)	1	0	0	0	0	0	0	0		0	0		0	0	1	0	0	0	0	1	0	0	0	1	1	0	0	0	0	0			0	0	1	0	0	1	1	0		0		0
Taxa2	Aves	Anseriformes	Anatidae	Melanitta	Melanitta_spp.	1	1	1	1	1	1	1	1		1	1		1	1	1	1	1	1	1	1	1	0	1	1	1	1	1	1	1	1			1	1	1	1	1	1	1	1		1		1
Taxa33	Aves	Anseriformes	Anatidae	Somateria	Somateria_spp.	0	0	0	0	0	0	0	0		0	0		0	0	0	0	0	0	0	0	0	0	0	0	0	0	0	1	0	0			0	0	0	0	0	0	0	0		0		0
Taxa27	Aves	Anseriformes	Anatidae	Anser	Anser_anser	0	0	0	0	0	0	0	0		0	0		0	0	0	0	0	0	0	0	0	0	0	0	0	0	0	0	0	0			0	0	0	0	0	0	0	0		0		0
Taxa29	Aves	Anseriformes	Anatidae	Anas	Anas_platyrhynchos	0	0	0	0	0	0	0	0		0	0		0	0	0	0	1	1	0	0	0	0	0	0	0	0	0	0	0	0			0	0	0	0	0	0	0	0		0		0
Taxa16	Aves	Charadriiformes	Laridae	Larus	Larus_spp.	0	0	0	0	0	0	0	0		0	1		0	0	0	0	0	0	0	0	0	0	1	0	1	0	0	0	0	1			0	0	0	0	0	0	1	1		0		0
Taxa28	Aves	Pelecaniformes	Ardeidae	Ardea	Ardea_cinerea	0	0	0	0	0	0	0	0		0	0		1	0	0	0	0	0	0	0	0	0	0	0	0	0	0	0	0	0			0	0	0	0	0	0	0	0		0		0
Taxa15	Aves	Suliformes	Sulidae	Phalacrocorax	Phalacrocorax_carbo	0	0	0	0	0	0	0	0		0	0		1	0	0	0	0	0	0	0	0	0	0	0	1	0	1	0	0	0			0	0	1	0	0	0	1	0		1		0
Taxa40	Aves	Suliformes	Sulidae	Morus	Morus_spp.	0	0	0	0	0	0	0	1		0	0		0	0	0	0	0	0	0	0	0	0	0	0	0	0	0	0	0	0			0	0	0	0	0	0	0	0		0		0
Taxa7	Aves	Columbiformes	Columbidae	Columba	Columba_palumbus	0	0	0	0	0	0	0	0		0	0		1	0	0	0	0	0	0	0	0	0	0	0	0	0	0	0	0	0			0	0	1	0	1	1	0	0		0		0
Taxa32	Aves	Columbiformes	Columbidae	Columba	Columba_livia	0	0	0	0	0	0	0	0		0	0		0	0	1	0	0	0	0	0	0	0	0	0	0	0	0	0	0	0			0	0	0	0	0	0	0	0		0		0
Taxa44	Aves	Columbiformes	Columbidae	Columba	Columba_spp.	0	0	0	0	0	0	0	0		0	0		0	0	0	0	0	0	0	0	0	0	0	0	0	0	0	0	0	0			0	0	0	0	0	0	0	0		0		0
Taxa35	Aves	Accipitriformes	Accipitridae	Buteo	Buteo_buteo	0	0	0	0	0	0	0	0		0	0		0	0	0	0	0	0	0	0	0	0	0	0	0	0	0	0	0	0			0	0	0	0	0	0	1	0		0		0
Taxa37	Aves	Accipitriformes	Accipitridae	Accipiter	Accipiter_nisus	0	0	0	0	0	0	0	0		0	0		0	0	0	0	0	0	0	0	0	0	0	0	0	0	0	0	0	0			0	0	0	0	0	0	0	0		0		0
Taxa26	Aves	Strigiformes	Strigidae	Strix	Strix_aluco	0	1	0	0	0	0	0	0		0	0		0	0	0	0	0	0	0	0	0	0	0	0	0	0	0	0	0	0			0	0	0	0	0	0	0	0		0		0
Taxa19	Aves	Piciformes	Picidae	Dendrocopos	Dendrocopos_major	0	0	0	0	0	1	0	0		0	0		0	0	0	0	0	0	0	0	0	1	0	0	0	0	0	0	0	0			0	0	0	1	0	0	0	0		0		0
Taxa43	Aves	Piciformes	Picidae	Picus	Picus_viridis	0	0	1	0	0	0	0	0		0	0		0	0	0	0	0	0	0	0	0	0	0	0	0	0	0	0	0	0			0	0	0	0	0	0	0	0		0		0
Taxa23	Aves	Passeriformes	Corvidae	Corvus	Corvus_spp.	0	0	1	0	0	0	0	0		1	1		0	1	1	0	0	1	0	0	0	0	0	0	0	0	0	0	0	0			0	0	0	0	0	0	0	0		0		0
Taxa11	Aves	Passeriformes	Alaudidae	Alauda	Alauda_gulgula (potentially Alauda arvensis)	1	1	0	1	1	0	1	0		0	0		0	0	0	0	0	0	0	0	0	0	0	0	1	0	0	0	1	0			0	0	0	0	0	0	0	1		1		0
Taxa34	Aves	Passeriformes	Hirundinidae	Delichon	Delichon_urbicum	0	0	0	0	0	0	0	0		0	0		0	0	0	0	0	0	0	0	0	0	0	0	0	0	0	0	0	0			0	0	0	0	0	0	0	0		0		0
Taxa6	Aves	Passeriformes	Muscicapidae	Erithacus	Erithacus_rubecula	0	0	1	0	0	0	0	0		0	0		0	0	1	0	0	1	0	0	0	0	0	1	0	0	0	0	0	1			0	0	0	0	0	0	1	0		0		0
Taxa24	Aves	Passeriformes	Sylviidae	Sylvia	Sylvia_atricapilla	0	0	0	0	0	0	0	0		0	0		0	1	0	0	0	0	0	0	0	0	0	0	0	0	0	0	0	0			0	0	0	0	0	0	0	0		0		0
Taxa36	Aves	Passeriformes	Sylviidae	Sylvia	Sylvia_spp.	0	0	0	0	0	0	0	0		0	0		0	0	0	0	0	0	0	0	0	0	0	0	1	0	0	0	0	0			0	0	0	0	0	0	0	0		0		0
Taxa10	Aves	Passeriformes	Phylloscopidae	Phylloscopus	Phylloscopus_collybita	0	0	0	0	0	1	0	0		0	0		0	0	0	1	0	1	1	0	0	1	0	1	1	0	0	0	0	1			0	0	1	1	0	0	1	0		0		0
Taxa14	Aves	Passeriformes	Certhiidae	Certhia	Certhia_brachydactyla	0	0	1	0	0	0	0	0		0	0		0	0	1	0	0	1	0	0	0	0	0	0	0	0	1	0	0	0			0	0	0	0	0	0	0	0		0		0
Taxa30	Aves	Passeriformes	Prunellidae	Prunella	Prunella_modularis	0	0	0	0	0	0	0	0		0	0		0	0	0	0	0	0	0	0	0	0	0	0	0	0	0	0	0	0			0	0	0	0	0	0	0	0		0		0
Taxa17	Aves	Passeriformes	Sittidae	Sitta	Sitta_europaea	0	0	0	0	0	0	0	0		0	0		0	0	1	0	0	0	0	0	0	0	0	0	0	0	1	0	0	0			0	0	0	0	0	0	0	0		0		0
Taxa38	Aves	Passeriformes	Sturnidae	Sturnus	Sturnus_vulgaris	1	0	0	0	0	0	0	0		0	0		0	0	0	0	0	0	0	0	0	0	0	0	0	0	0	0	0	0			0	0	0	0	0	0	0	0		0		0
Taxa31	Aves	Passeriformes	Regulidae	Regulus	Regulus_regulus	0	0	0	0	0	0	0	0		0	0		0	1	0	0	0	0	0	0	0	0	0	0	0	0	0	0	0	0			0	0	0	0	0	0	0	0		0		0
Taxa3	Aves	Passeriformes	Troglodytidae	Troglodytes	Troglodytes_troglodytes	0	0	1	0	0	0	0	0		0	0		0	0	1	0	0	1	1	0	0	0	0	1	0	0	1	0	0	1			0	0	0	1	0	0	1	0		1		0
Taxa45	Aves	Passeriformes	Troglodytidae	Troglodytes	Troglodytes_spp.	0	0	0	0	0	0	0	0		0	0		0	0	0	0	0	0	0	0	0	0	0	0	0	0	0	0	0	0			0	0	0	0	0	0	0	0		0		0
Taxa9	Aves	Passeriformes	Turdidae	Turdus	Turdus_merula	0	0	1	0	0	0	0	0		0	0		0	0	1	0	0	1	0	0	0	0	0	1	0	1	1	0	0	0			0	0	0	1	0	0	0	0		0		0
Taxa8	Aves	Passeriformes	Paridae	Parus	Parus_major	0	0	0	0	0	0	0	0		0	0		0	1	1	0	0	1	0	0	0	0	0	1	1	0	0	1	1	0			0	0	1	0	0	1	0	1		0		0
Taxa20	Aves	Passeriformes	Paridae	Cyanistes	Cyanistes_spp.	0	0	0	0	0	0	0	0		0	0		0	1	1	0	0	1	0	0	0	0	0	1	0	0	0	0	1	0			0	0	0	0	0	0	0	1		0		0
Taxa41	Aves	Passeriformes	Paridae	Poecile	Poecile_spp.	0	0	0	0	0	0	0	0		0	0		0	0	0	0	0	0	0	0	0	0	0	0	0	0	0	0	0	0			0	0	0	0	0	0	0	0		0		0
Taxa5	Aves	Passeriformes	Fringillidae	Fringilla	Fringilla_coelebs	0	0	0	0	0	0	0	0		1	0		0	0	0	0	0	0	0	0	0	0	0	0	0	0	0	0	0	0			0	0	0	0	0	0	0	0		1		0
Taxa12	Aves	Passeriformes	Fringillidae	Pyrrhula	Pyrrhula_pyrrhula	0	0	1	0	0	1	0	0		1	0		1	0	1	0	0	1	0	0	0	0	0	1	1	1	1	1	0	0			0	0	0	1	0	0	0	0		0		0
Taxa18	Aves	Passeriformes	Passeridae	Passer	Passer_montanus	0	0	0	0	0	0	1	1		0	0		0	0	0	0	0	1	0	0	0	0	0	0	0	0	0	0	0	0			0	0	0	0	0	0	0	0		0		0
Taxa9	Mammalia	Rodentia	Muridae	Apodemus	Apodemus_flavicollis	0	0			0						0		0	0	0			0		0	0	0		0	0					0	0				0		0	0	0	0	0
Taxa19	Mammalia	Rodentia	Muridae	Apodemus	Apodemus_sylvaticus	0	0			0						0		0	0	0			0		0	0	0		0	0					0	0				0		1	0	0	0	0
Taxa10	Mammalia	Rodentia	Muridae	Mus	Mus_spp.	0	0			0						0		0	0	0			0		0	0	0		0	0					0	0				0		0	0	0	0	0
Taxa5	Mammalia	Rodentia	Cricetidae	Myodes	Myodes_glareolus	0	0			0						1		0	0	0			0		0	0	0		0	0					1	0				0		0	1	1	0	0
Taxa13	Mammalia	Rodentia	Cricetidae	Microtus	Microtus_agrestis	0	0			0						0		0	0	0			0		0	0	0		0	0					0	0				0		0	0	0	0	0
Taxa23	Mammalia	Rodentia	Cricetidae	Microtus	Microtus_arvalis	0	1			0						0		0	0	0			0		0	0	0		0	0					0	0				0		0	0	0	0	0
Taxa17	Mammalia	Rodentia	Sciuridae	Sciurus	Sciurus_vulgaris	0	1			0						0		1	0	0			0		0	1	0		0	0					0	0				0		0	0	0	0	0
Taxa15	Mammalia	Chiroptera	Vespertilionidae	Pipistrellus	Pipistrellus_pygmaeus	0	0			0						0		0	0	0			0		0	0	0		0	0					0	0				1		0	0	0	0	0
Taxa20	Mammalia	Chiroptera	Vespertilionidae	Myotis	Myotis_spp.	0	0			0						0		0	0	0			0		0	0	0		0	0					0	0				0		0	0	0	0	1
Taxa18	Mammalia	Eulipotyphla	Erinaceidae	Erinaceus	Erinaceus_europaeus	0	0			0						0		0	0	0			0		0	0	0		0	0					0	0				0		0	0	0	0	0
Taxa24	Mammalia	Eulipotyphla	Soricidae	Sorex	Sorex_araneus	0	0			0						0		0	0	0			1		0	0	0		0	0					0	0				0		0	0	0	0	0
Taxa7	Mammalia	Artiodactyla	Cervidae	Cervus	Cervus_elaphus	0	1			0						1		0	1	1			1		1	0	0		1	1					0	1				0		0	0	0	0	0
Taxa11	Mammalia	Artiodactyla	Bovidae	Bison	Bison_bonasus	0	1			0						0		0	0	0			0		0	0	0		0	0					0	0				0		0	0	0	0	0
Taxa22	Mammalia	Carnivora	Canidae	Vulpes	Vulpes_vulpes	0	0			0						0		0	0	0			0		0	0	0		0	0					0	0				0		0	0	0	0	0
Taxa12	Amphibia	Anura	Bufonidae	Bufo	Bufo_bufo	1	1			1						0		0	0	0			0		0	0	1		0	0					0	0				0		0	0	0	1	0
[truncated: 76 more columns]
